# Supplementary material for: Exploitation of sugar ring flipping for a hinge-type tether assisting a [2 + 2] cycloaddition
Source: Royal Society of Chemistry journal article supplement (doi:10.1039/b609115f), 2006-01-01
Supplement: b609115f.pdf [file b609115f.pdf]

## Supplementary Information

# Exploitation of Sugar Ring Flipping for a Hinge-Type Tether Assisting a [2+2] Cycloaddition

*Hideya Yuasa,\* Masatoshi Nakatani, and Hironobu Hashimoto*

### Table of contents

|                                                                      |     |
|----------------------------------------------------------------------|-----|
| Figure S1. <sup>1</sup> H NMR of compound <b>2</b> .                 | S3  |
| Figure S2. <sup>13</sup> C NMR of compound <b>2</b> .                | S4  |
| Figure S3. <sup>1</sup> H NMR of compound <b>3-1</b> .               | S5  |
| Figure S4. <sup>1</sup> H NMR of compound <b>3-2</b> .               | S6  |
| Figure S5. <sup>13</sup> C NMR of compound <b>3-1</b> .              | S7  |
| Figure S6. <sup>13</sup> C NMR of compound <b>3-2</b> .              | S8  |
| Figure S7. <sup>1</sup> H NMR of compound <b>4</b> .                 | S9  |
| Figure S8. <sup>13</sup> C NMR of compound <b>4</b> .                | S10 |
| Figure S9. <sup>1</sup> H NMR of compound <b>5</b> .                 | S11 |
| Figure S10. <sup>13</sup> C NMR of compound <b>5</b> .               | S12 |
| Figure S11. <sup>1</sup> H NMR of compound <b>3d<sub>7</sub></b> .   | S13 |
| Figure S12. <sup>13</sup> C NMR of compound <b>3d<sub>7</sub></b> .  | S14 |
| Figure S13. <sup>1</sup> H NMR of compound <b>4d<sub>14</sub></b> .  | S15 |
| Figure S14. <sup>13</sup> C NMR of compound <b>4d<sub>14</sub></b> . | S16 |
| Figure S15. <sup>1</sup> H NMR of compound <b>6</b> .                | S17 |
| Figure S16. <sup>13</sup> C NMR of compound <b>6</b> .               | S18 |
| Figure S17. <sup>1</sup> H NMR of compound <b>5d<sub>14</sub></b> .  | S19 |
| Figure S18. <sup>13</sup> C NMR of compound <b>5d<sub>14</sub></b> . | S20 |
| Figure S19. <sup>1</sup> H NMR of compound <b>3Br</b> .              | S21 |
| Figure S20. <sup>13</sup> C NMR of compound <b>3Br</b> .             | S22 |
| Figure S21. <sup>1</sup> H NMR of compound <b>4Br</b> .              | S23 |

|                                                                                                                                                           |     |
|-----------------------------------------------------------------------------------------------------------------------------------------------------------|-----|
| Figure S22. $^{13}\text{C}$ NMR of compound <b>4Br</b> .                                                                                                  | S24 |
| Figure S23. $^1\text{H}$ NMR of compound <b>5Br</b> .                                                                                                     | S25 |
| Figure S24. $^{13}\text{C}$ NMR of compound <b>5Br</b> .                                                                                                  | S26 |
| Figure S25. $^1\text{H}$ NMR for the mixture of <b>5<sub>trans-cis</sub></b> , <b>5<sub>trans-cis</sub></b> , and <b>5<sub>trans-cis</sub> (Fr2)</b> .    | S27 |
| Figure S26. $^{13}\text{C}$ NMR for the mixture of <b>5<sub>trans-cis</sub></b> , <b>5<sub>trans-cis</sub></b> , and <b>5<sub>trans-cis</sub> (Fr2)</b> . | S28 |
| Figure S27. $^1\text{H}$ NMR of compound <b>7A</b> .                                                                                                      | S29 |
| Figure S28. $^{13}\text{C}$ NMR of compound <b>7A</b> .                                                                                                   | S30 |
| Figure S29. $^1\text{H}$ NMR of compound <b>7B</b> .                                                                                                      | S31 |
| Figure S30. HMQC of compound <b>7B</b> .                                                                                                                  | S32 |
| Figure S31. $^1\text{H}$ NMR for the mixture of <b>7A</b> , <b>7C</b> , and <b>7D (Fr4)</b> .                                                             | S33 |
| Figure S32. $^{13}\text{C}$ NMR for the mixture of <b>7A</b> , <b>7C</b> , and <b>7D (Fr4)</b> .                                                          | S34 |
| Figure S33. $^1\text{H}$ NMR of compound <b>8<math>\beta</math></b> .                                                                                     | S35 |
| Figure S34. $^{13}\text{C}$ NMR of compound <b>8<math>\beta</math></b> .                                                                                  | S36 |
| Figure S35. $^1\text{H}$ NMR for the mixture of <b>8<math>\beta</math></b> , <b>8<math>\delta</math></b> , and <b>8<math>\xi</math> (Fr4)</b> .           | S37 |
| Figure S36. $^{13}\text{C}$ NMR for the mixture of <b>8<math>\beta</math></b> , <b>8<math>\delta</math></b> , and <b>8<math>\xi</math> (Fr4)</b> .        | S38 |
| Figure S37. $^1\text{H}$ NMR of compound <b>7d<sub>14A</sub></b> .                                                                                        | S39 |
| Figure S38. HMQC of compound <b>7d<sub>14A</sub></b> .                                                                                                    | S40 |
| Figure S39. $^1\text{H}$ NMR of compound <b>7d<sub>14B</sub></b> .                                                                                        | S41 |
| Figure S40. HMBC of compound <b>7d<sub>14B</sub></b> .                                                                                                    | S42 |
| Figure S41. $^1\text{H}$ NMR for the mixture of <b>7d<sub>14A</sub></b> , <b>7d<sub>14C</sub></b> , and <b>7d<sub>14D</sub> (Fr3)</b> .                   | S43 |
| Figure S42. HMBC for the mixture of <b>7d<sub>14A</sub></b> , <b>7d<sub>14C</sub></b> , and <b>7d<sub>14D</sub> (Fr3)</b> .                               | S44 |
| Figure S43. $^1\text{H}$ NMR of compound <b>7BrA</b> .                                                                                                    | S45 |
| Figure S44. $^{13}\text{C}$ NMR of compound <b>7BrA</b> .                                                                                                 | S46 |
| Figure S45. $^1\text{H}$ NMR for the mixture of <b>7BrA</b> and <b>7BrB (Fr1)</b> .                                                                       | S47 |
| Figure S46. $^{13}\text{C}$ NMR for the mixture of <b>7BrA</b> and <b>7BrB (Fr1)</b> .                                                                    | S48 |
| Figure S47. $^1\text{H}$ NMR of compound <b>8Br<math>\beta</math></b> .                                                                                   | S49 |
| Figure S48. $^{13}\text{C}$ NMR of compound <b>8Br<math>\beta</math></b> .                                                                                | S50 |

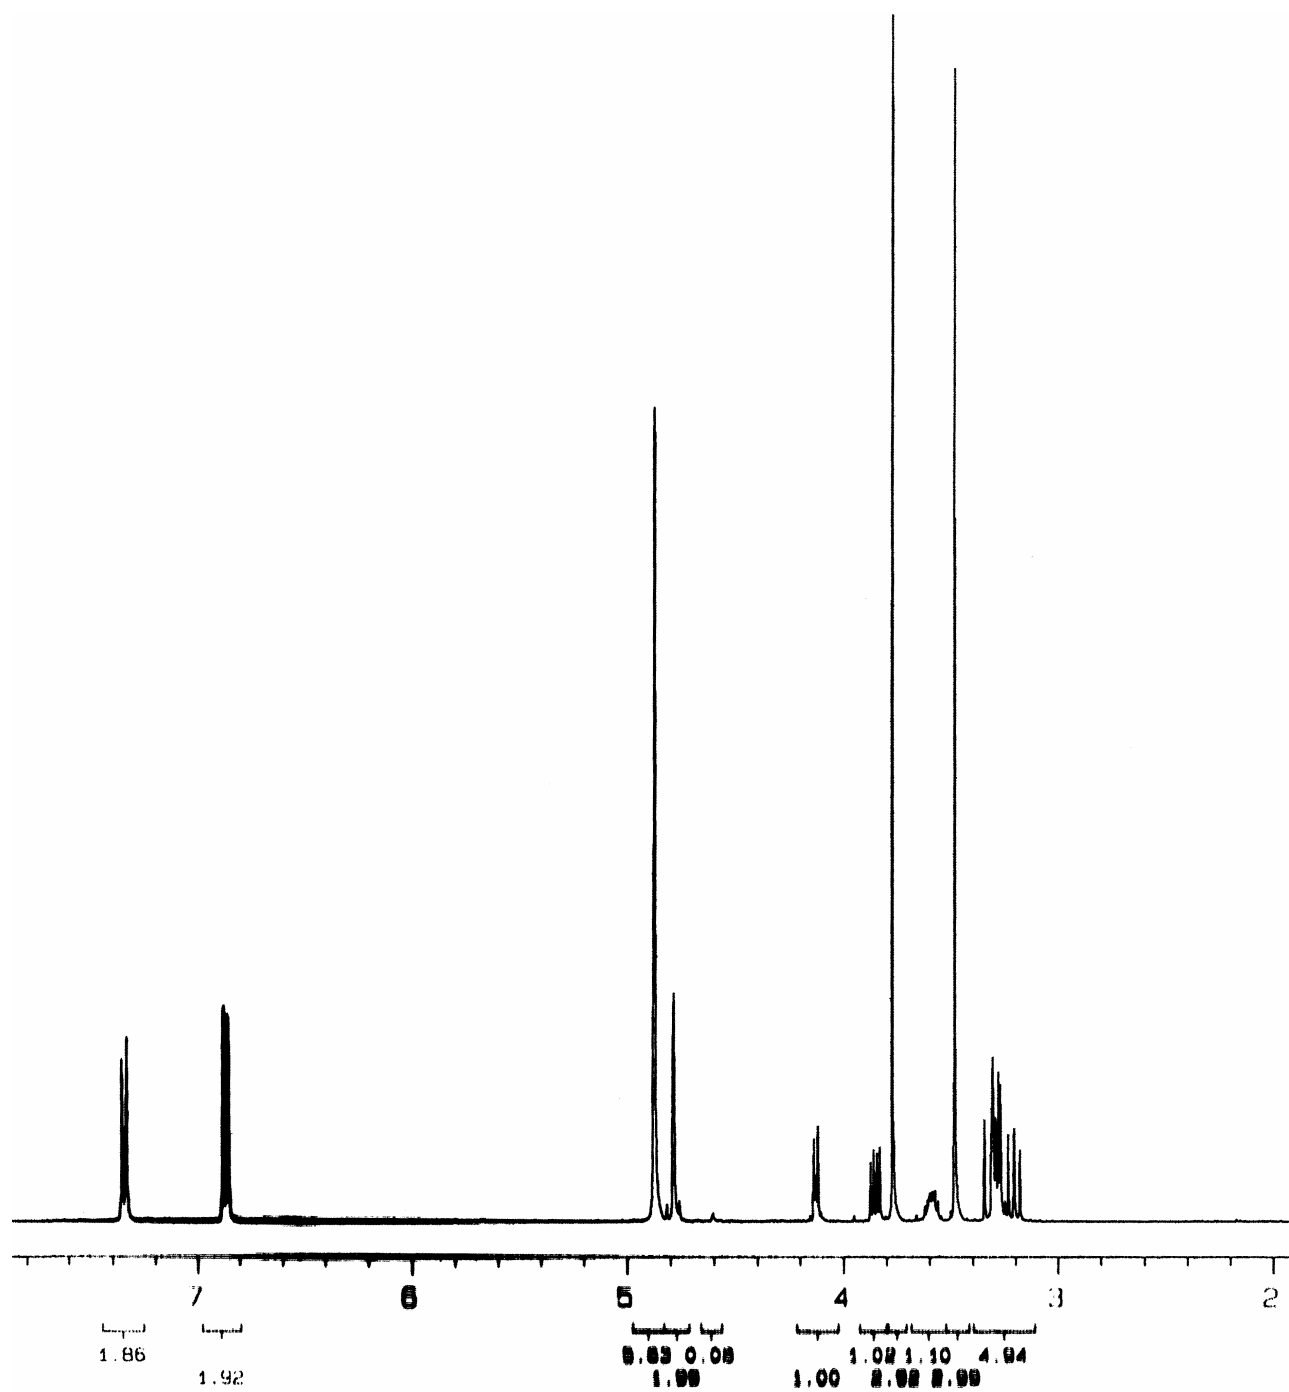

Figure S1. <sup>1</sup>H NMR of methyl 3-*O*-*p*-methoxybenzyl-β-*D*-xylopyranoside (**2**).

C:\WINNMR\98\COMMON\DATA\Nakatani\MN251\\*Auto1\BCM\_E1.ALS  
MN251.01

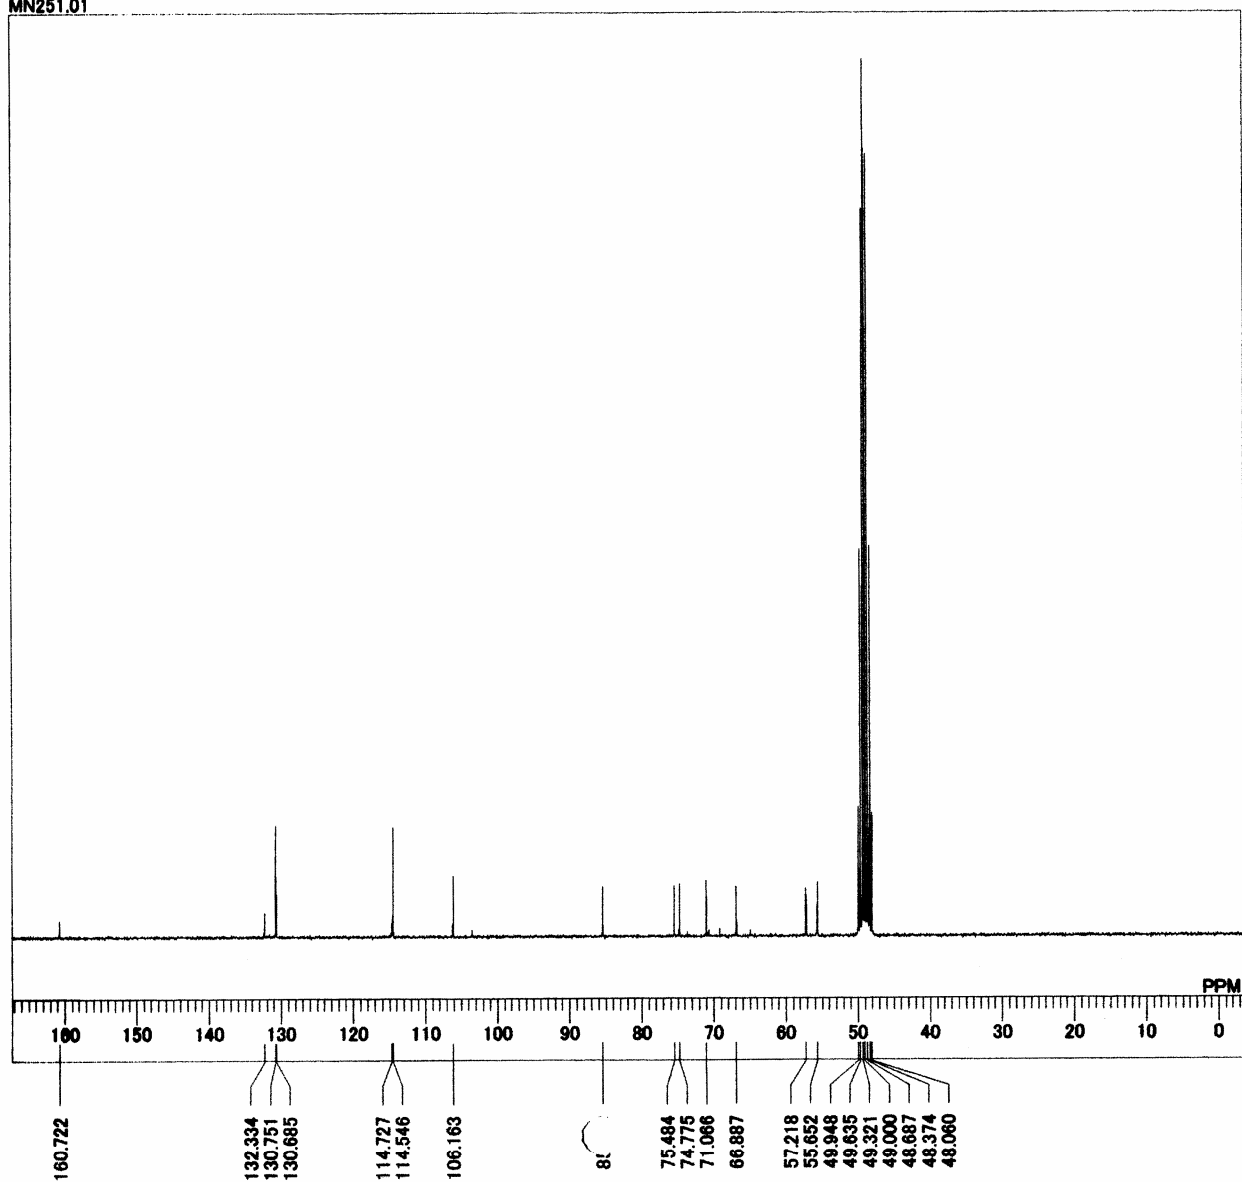

Figure S2.  $^{13}\text{C}$  NMR of methyl 3-*O*-*p*-methoxybenzyl- $\beta$ -D-xylopyranoside (**2**).

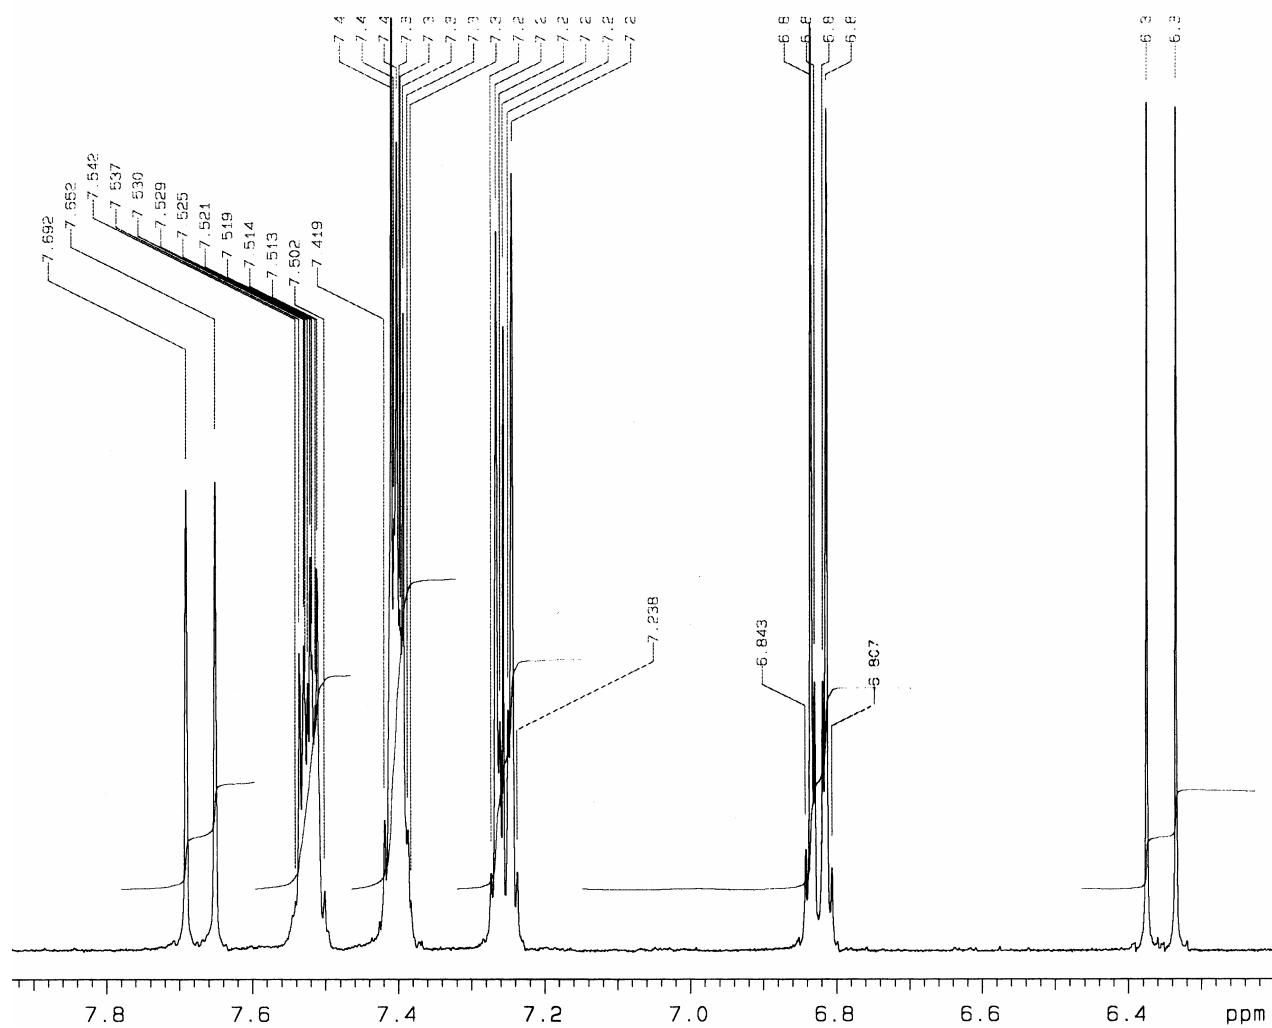

Figure S3.  ${}^1\text{H}$  NMR of methyl 4-*O*-(*E*)-cinnamoyl-3-*O*-*p*-methoxybenzyl- $\beta$ -D-xylopyranoside (**3**)-1.

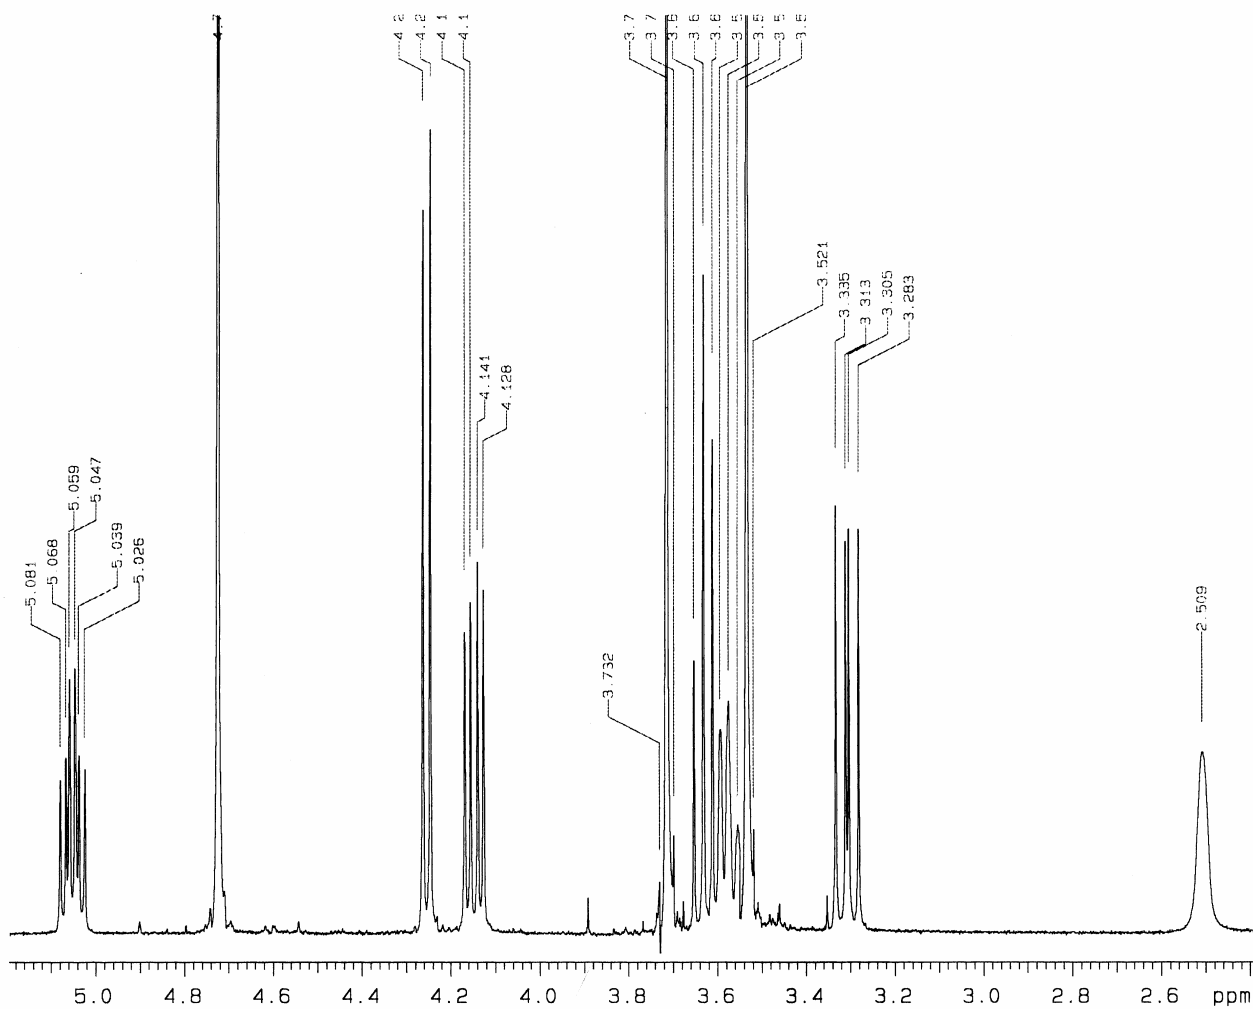

Figure S4. <sup>1</sup>H NMR of methyl 4-*O*-(*E*)-cinnamoyl-3-*O*-*p*-methoxybenzyl-β-*D*-xylopyranoside (**3**)-2.

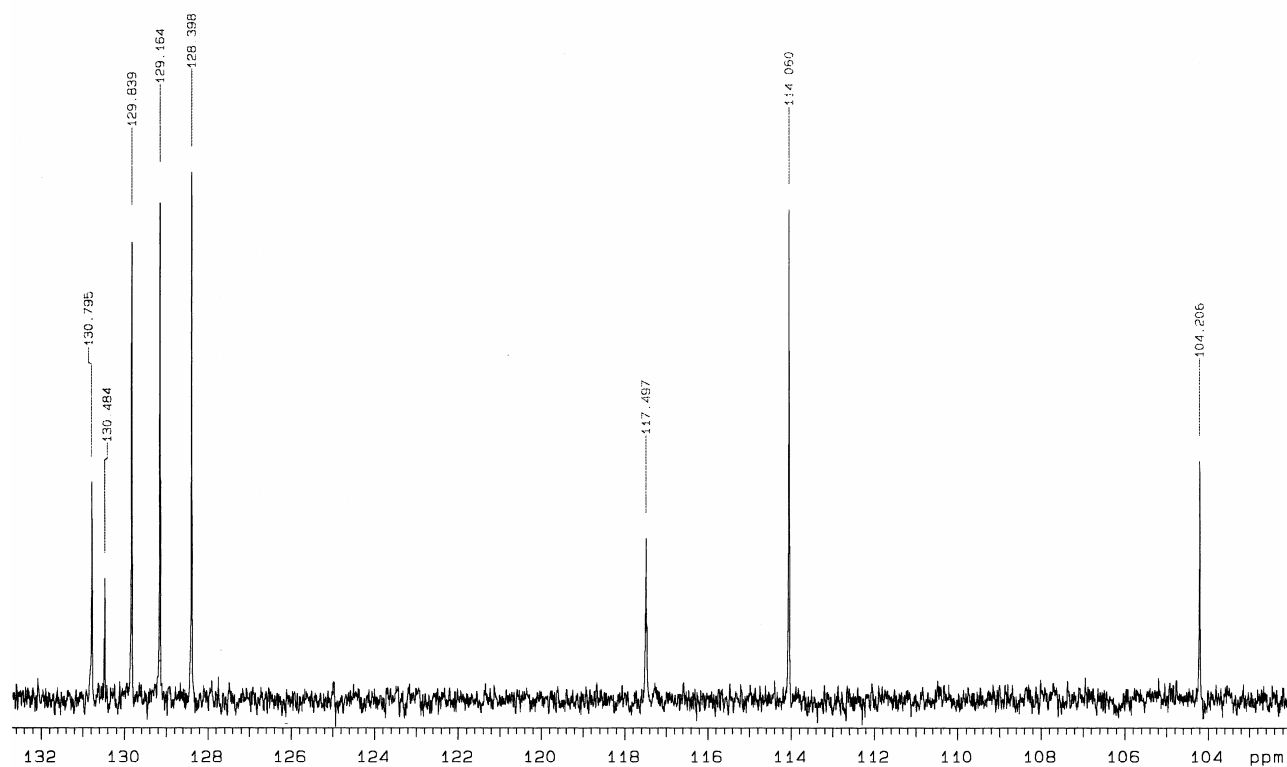

Figure S5.  $^{13}\text{C}$  NMR of methyl 4-*O*-(*E*)-cinnamoyl-3-*O*-*p*-methoxybenzyl- $\beta$ -D-xylopyranoside (**3**)-1.

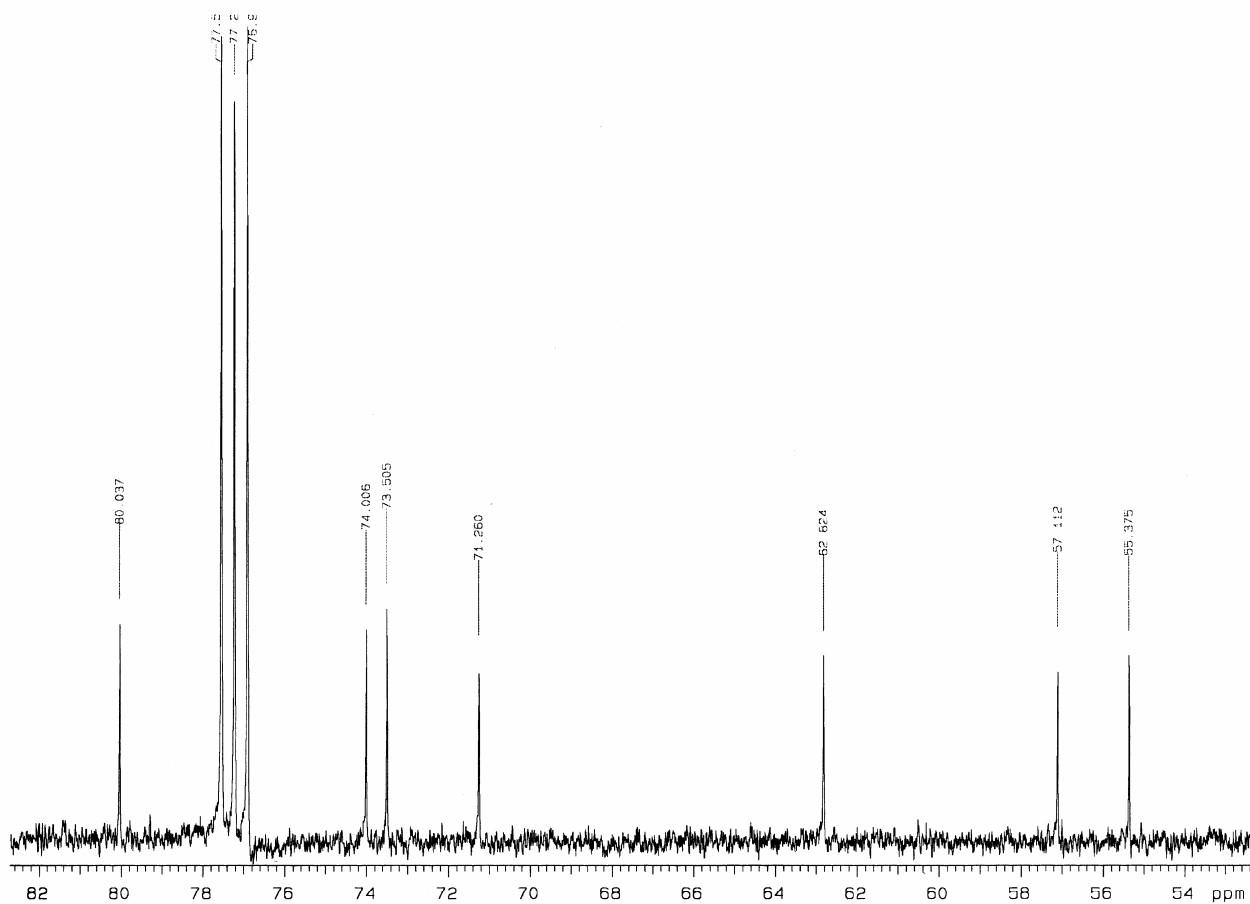

Figure S6.  $^{13}\text{C}$  NMR of methyl 4-*O*-(*E*)-cinnamoyl-3-*O*-*p*-methoxybenzyl- $\beta$ -D-xylopyranoside (**3**)-2.



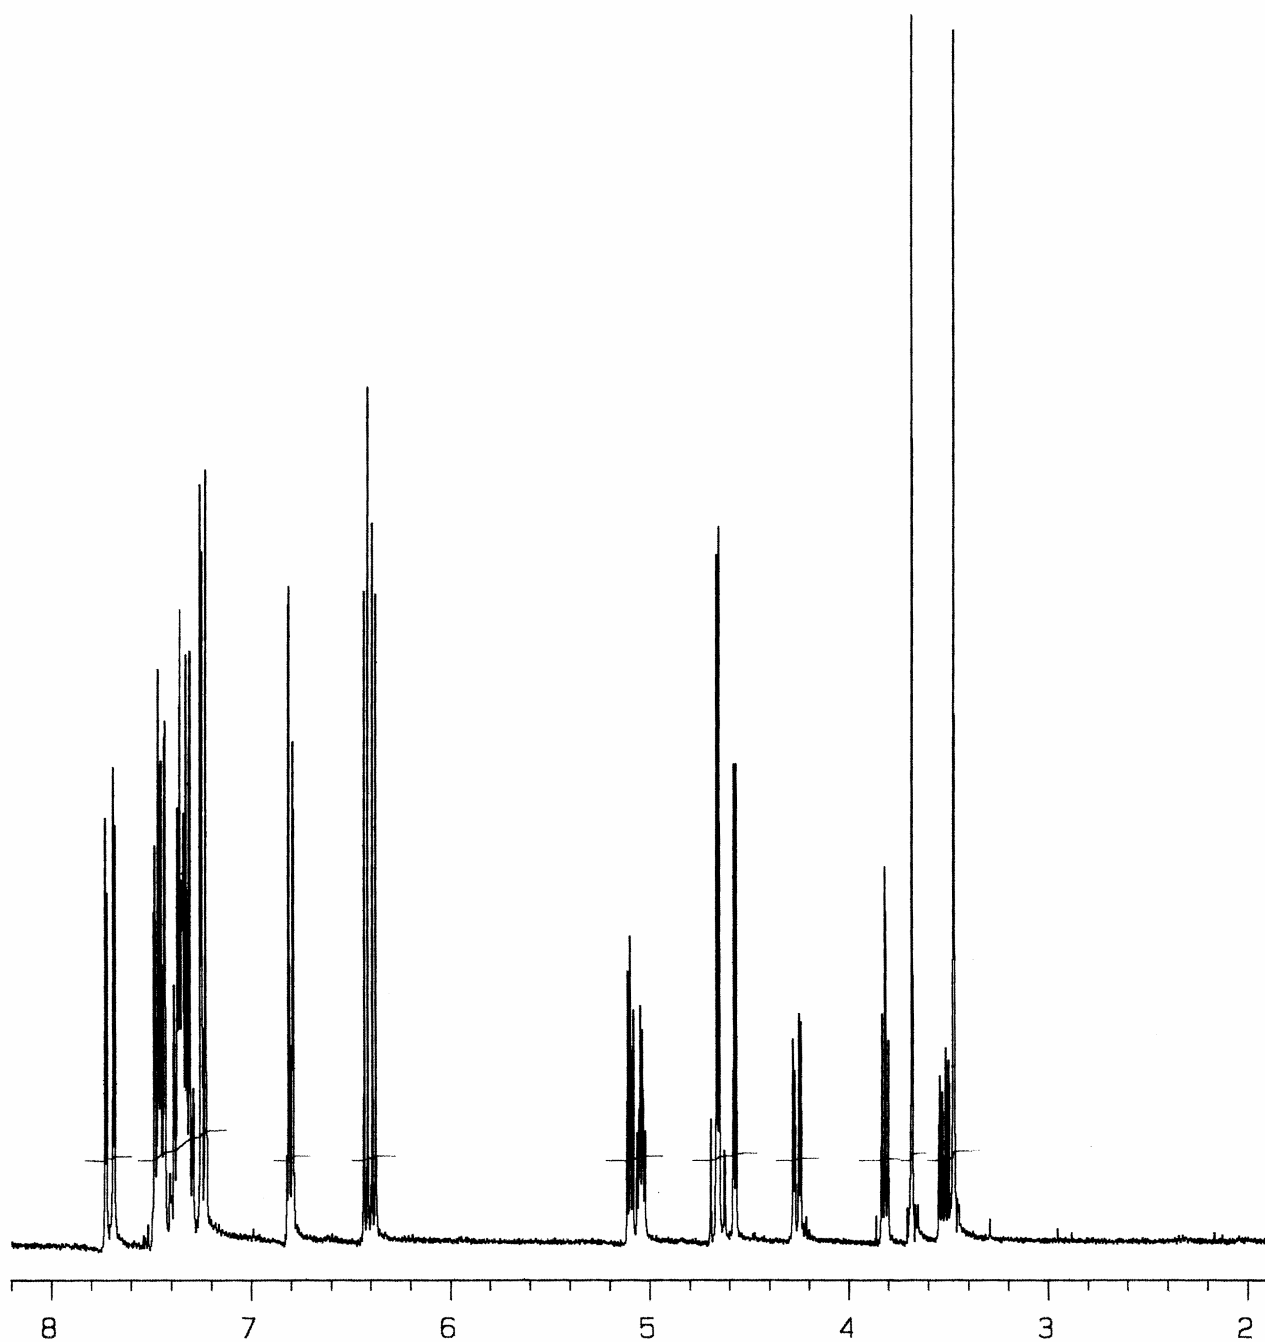

Figure S7.  $^1\text{H}$  NMR of methyl 2,4-di-*O*-(*E*)-cinnamoyl-3-*O*-*p*-methoxybenzyl- $\beta$ -D-xylopyranoside (**4**).

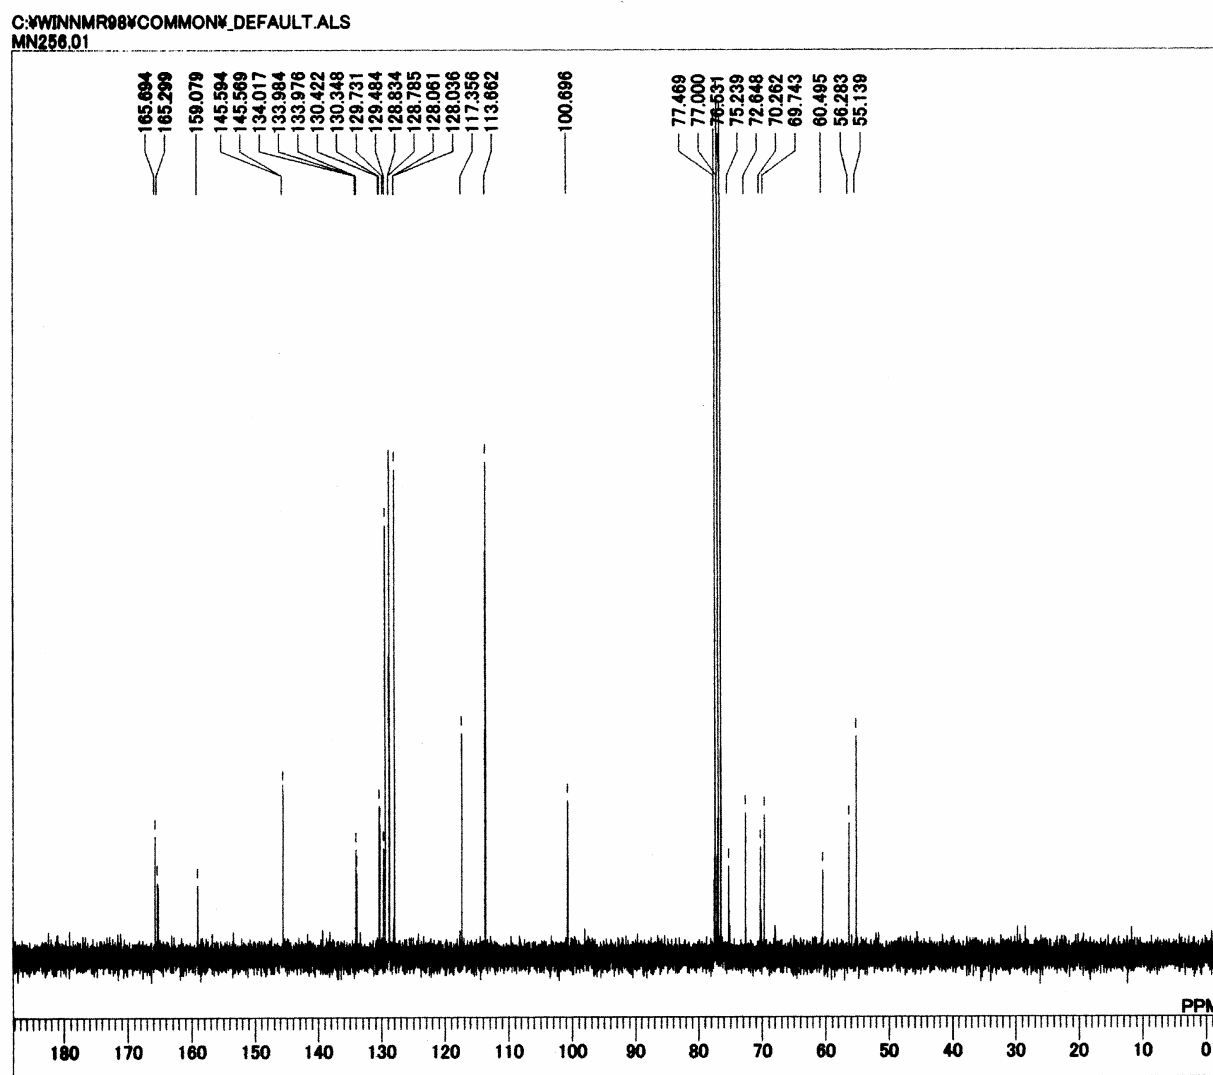

Figure S8.  $^{13}\text{C}$  NMR of methyl 2,4-di-*O*-(*E*)-cinnamoyl-3-*O*-*p*-methoxybenzyl- $\beta$ -D-xylopyranoside (**4**).

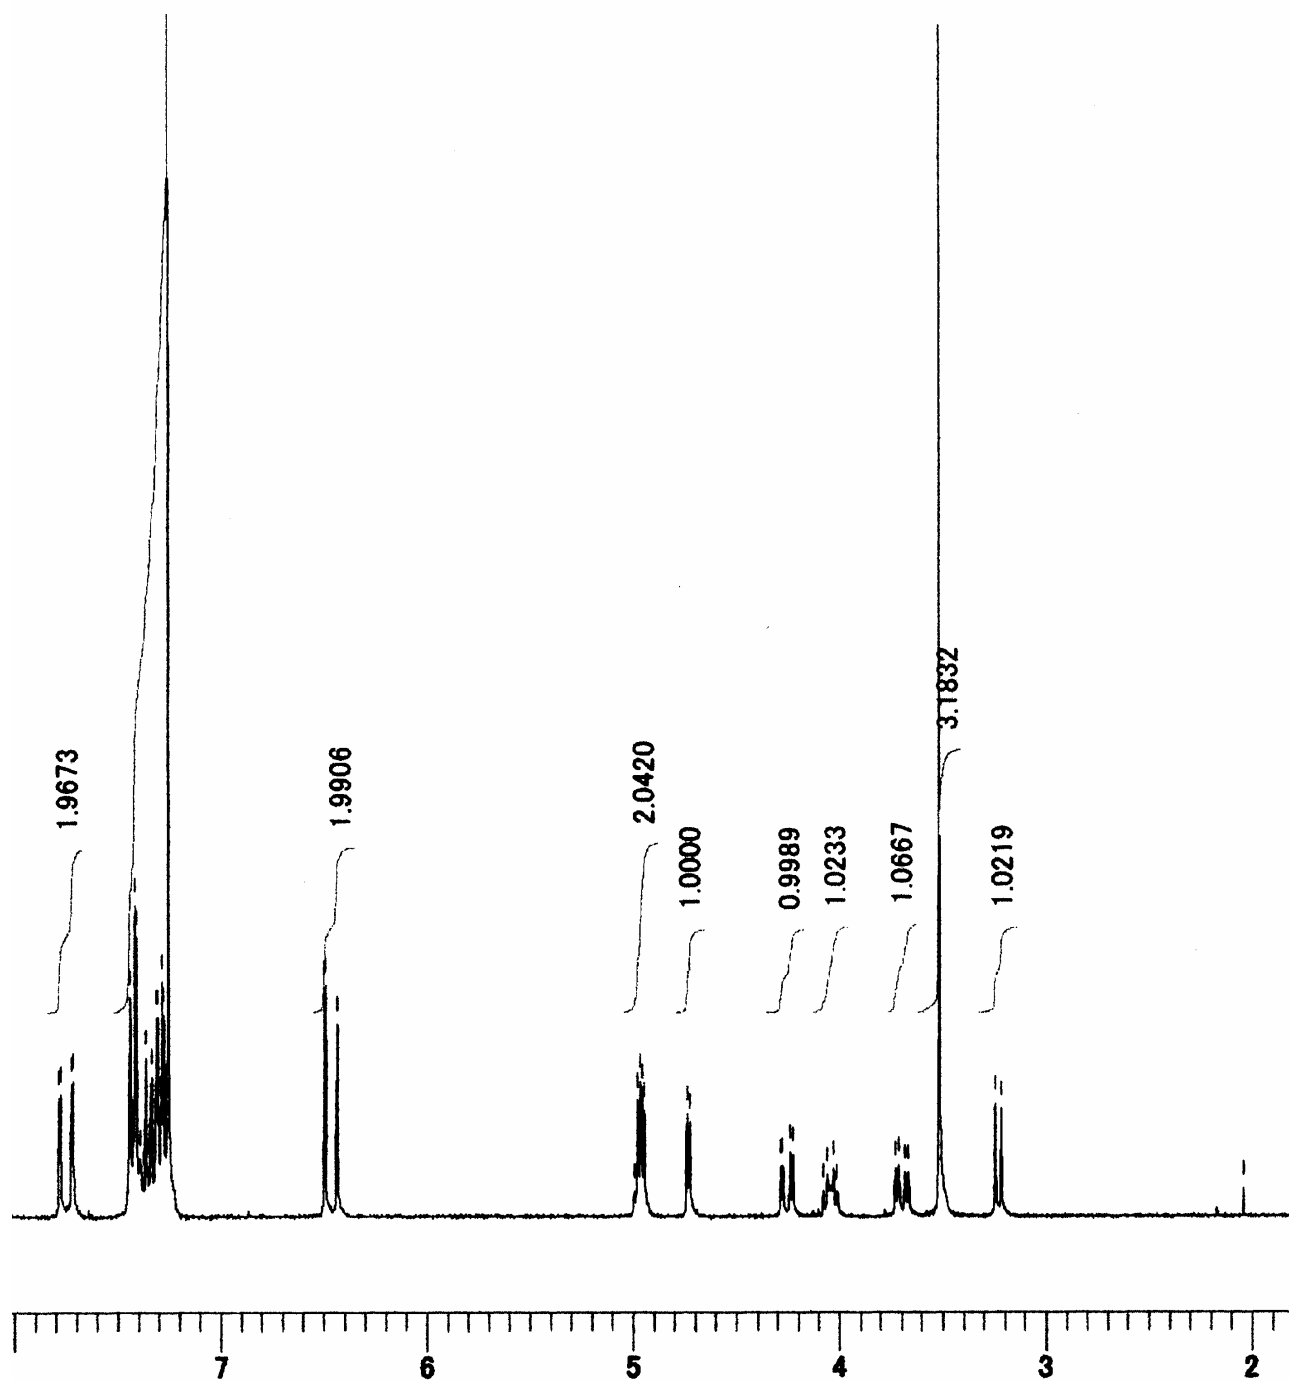

Figure S9. <sup>1</sup>H NMR of methyl 2,4-di-*O*-(*E*)-cinnamoyl-β-D-xylopyranoside (**5**).

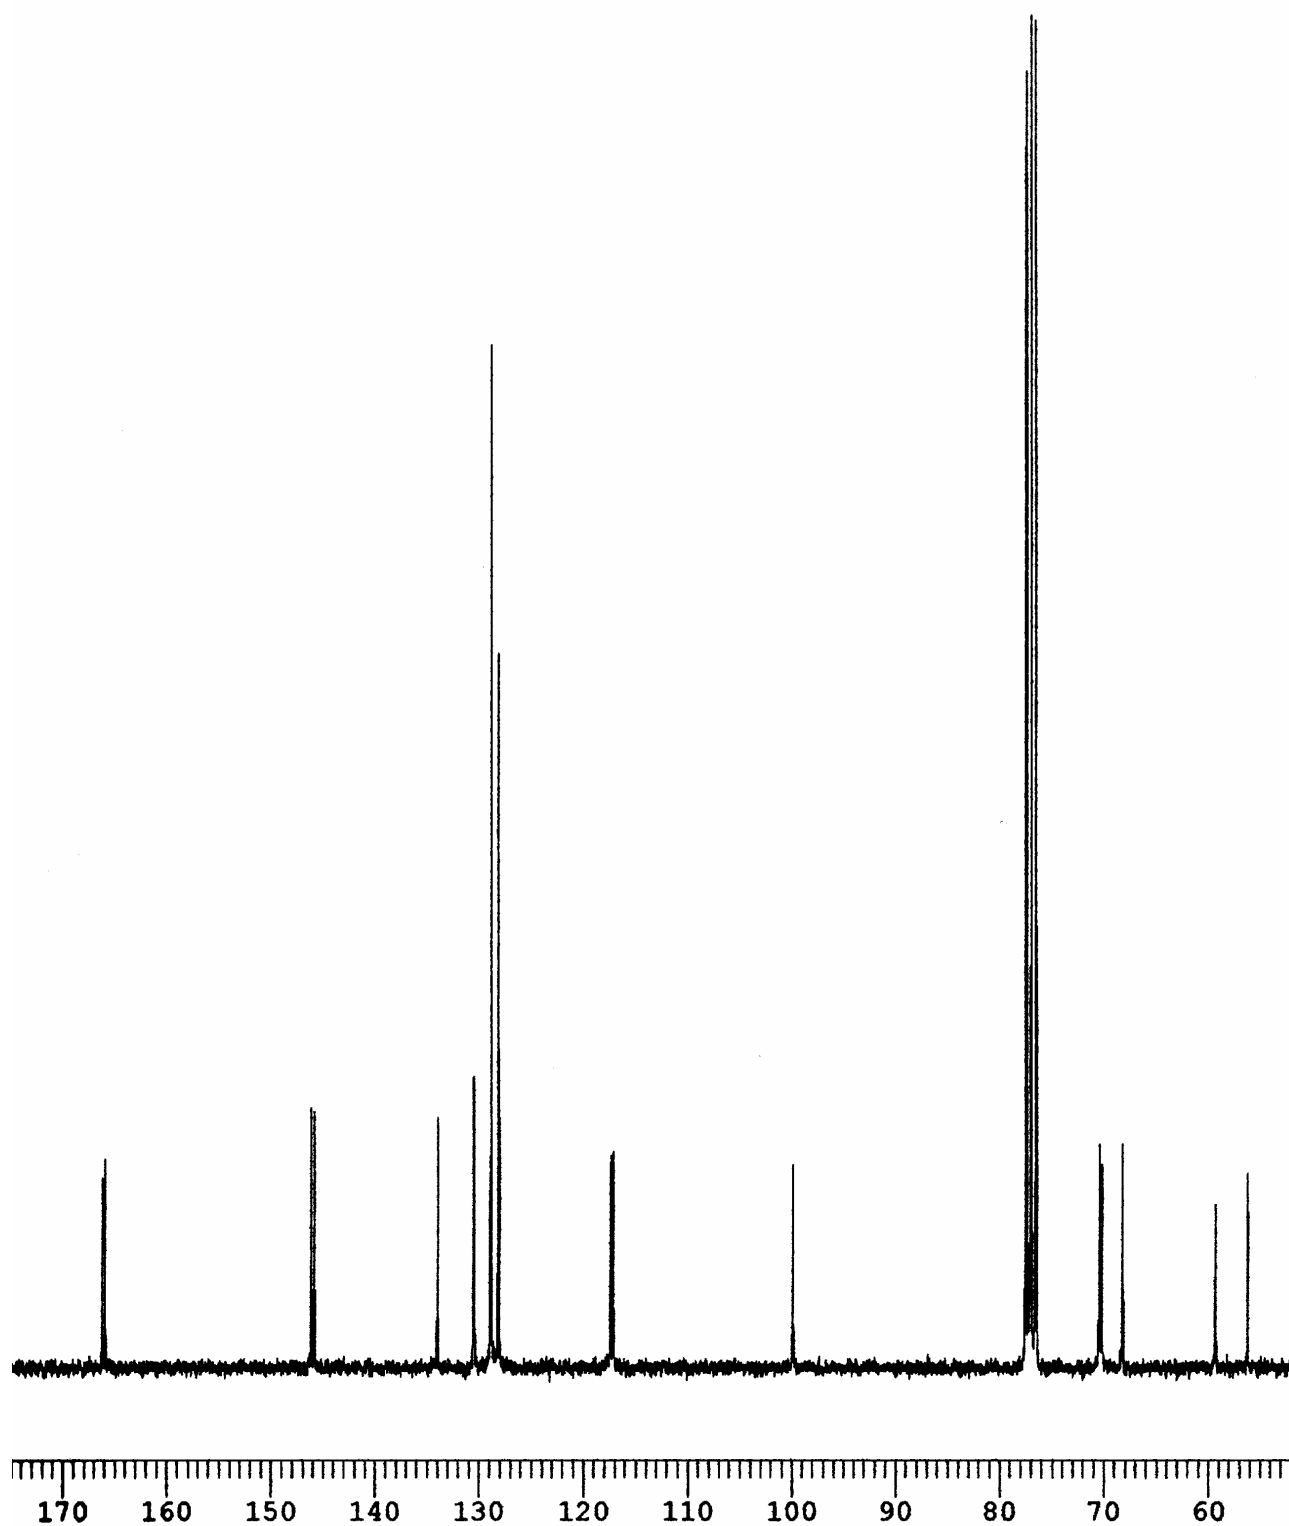

Figure S10.  $^{13}\text{C}$  NMR of methyl 2,4-di-*O*-(*E*)-cinnamoyl- $\beta$ -D-xylopyranoside (**5**).

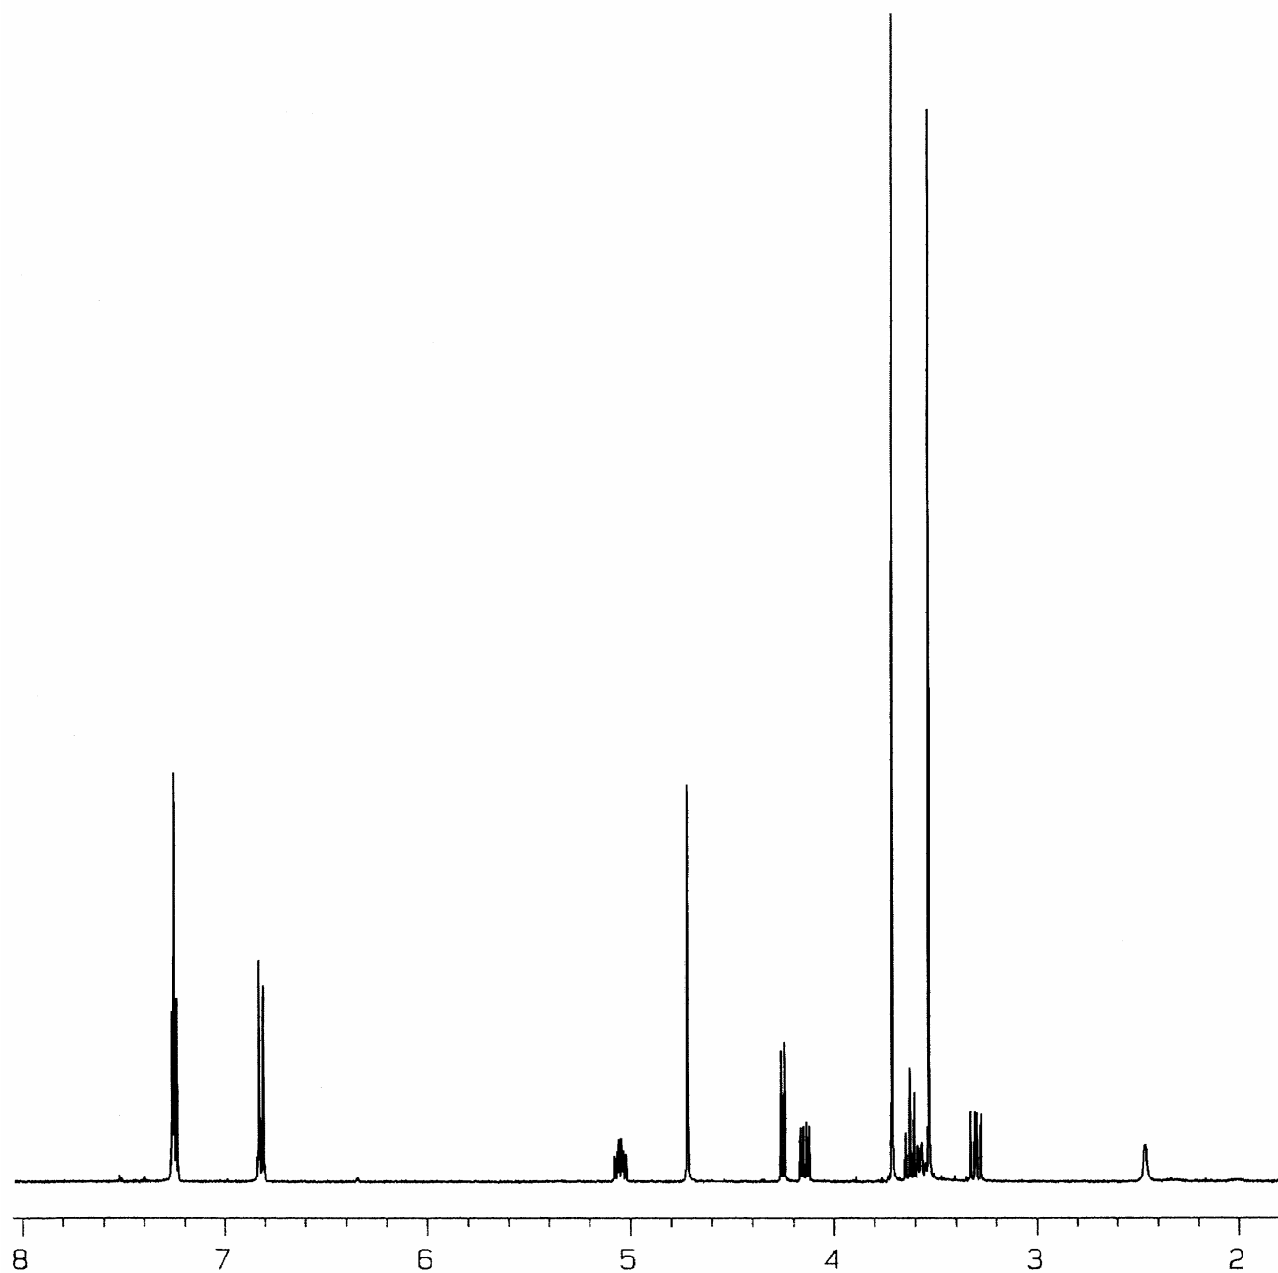

Figure S11.  $^1\text{H}$  NMR of methyl 4-*O*-(*E*)-cinnamoyl-*d*<sub>7</sub>-3-*O*-*p*-methoxybenzyl- $\beta$ -*D*-xylopyranoside (**3d<sub>7</sub>**).

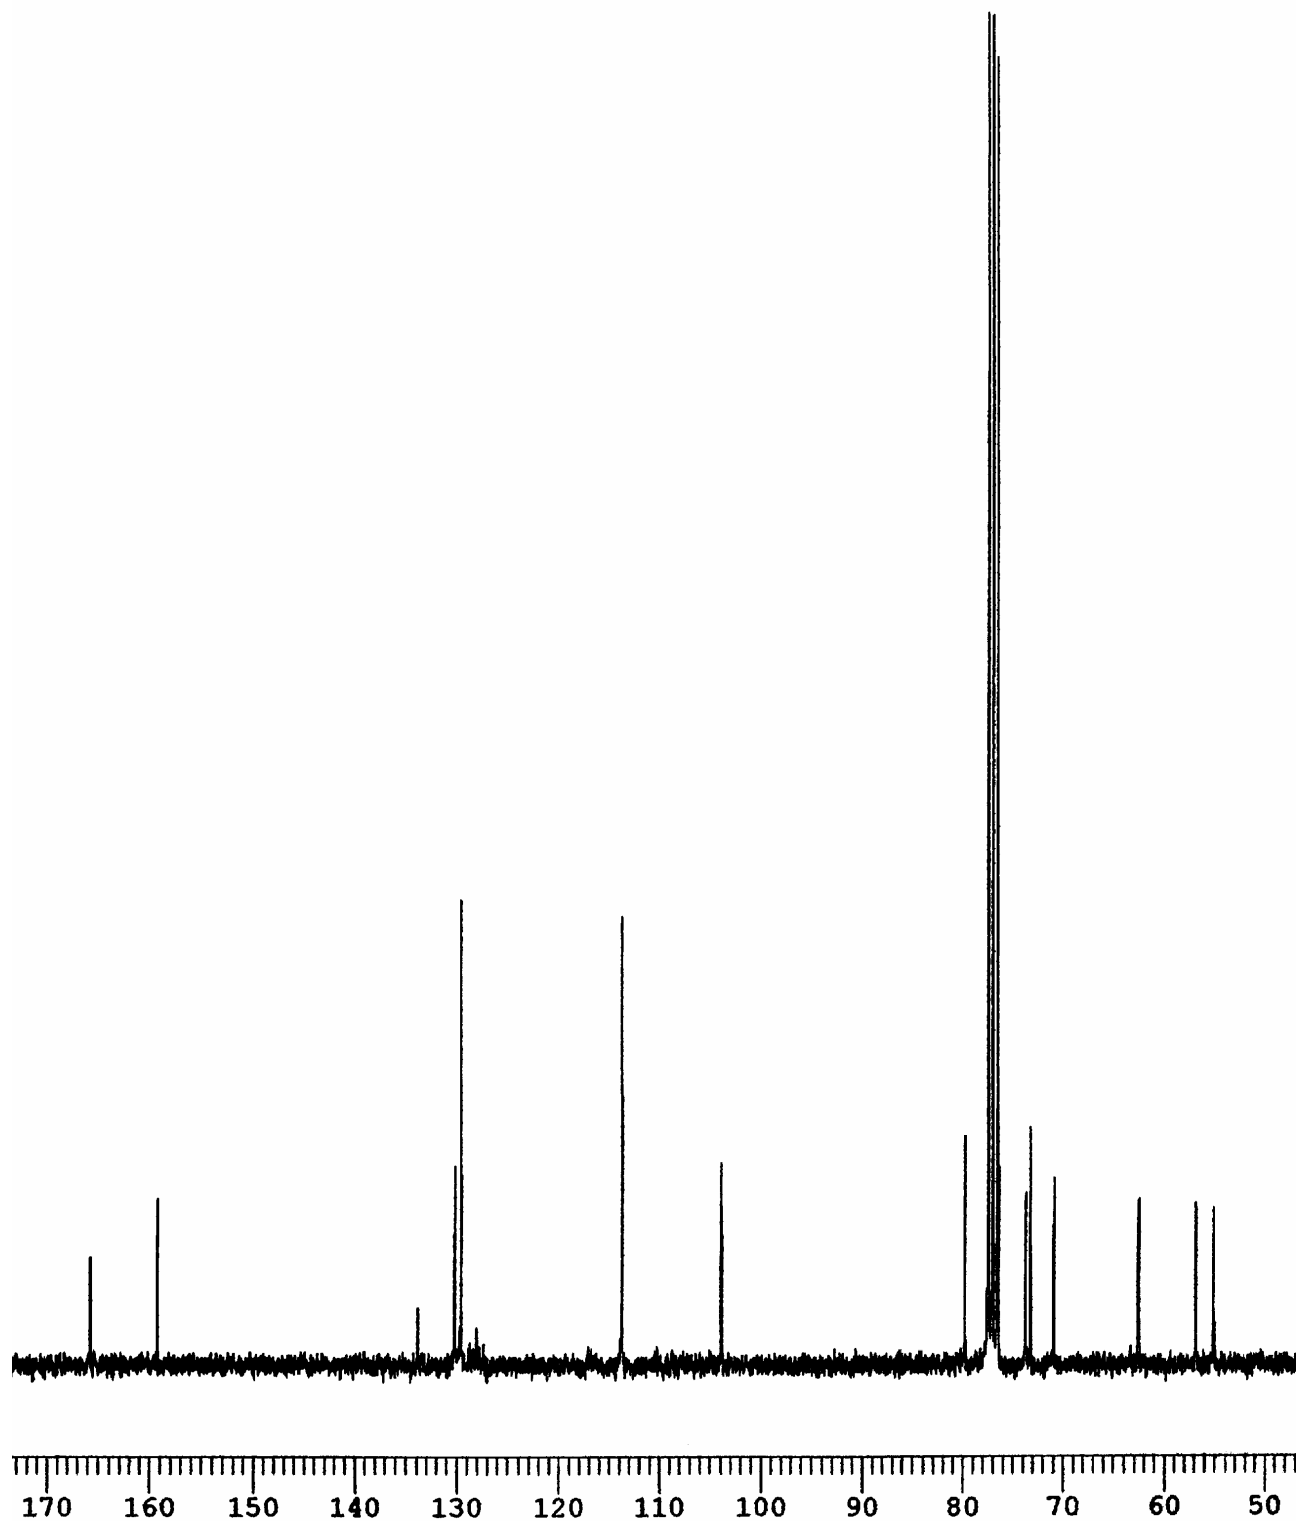

Figure S12.  $^{13}\text{C}$  NMR of methyl 4-*O*-(*E*)-cinnamoyl-*d*<sub>7</sub>-3-*O*-*p*-methoxybenzyl- $\beta$ -*D*-xylopyranoside (**3d<sub>7</sub>**).

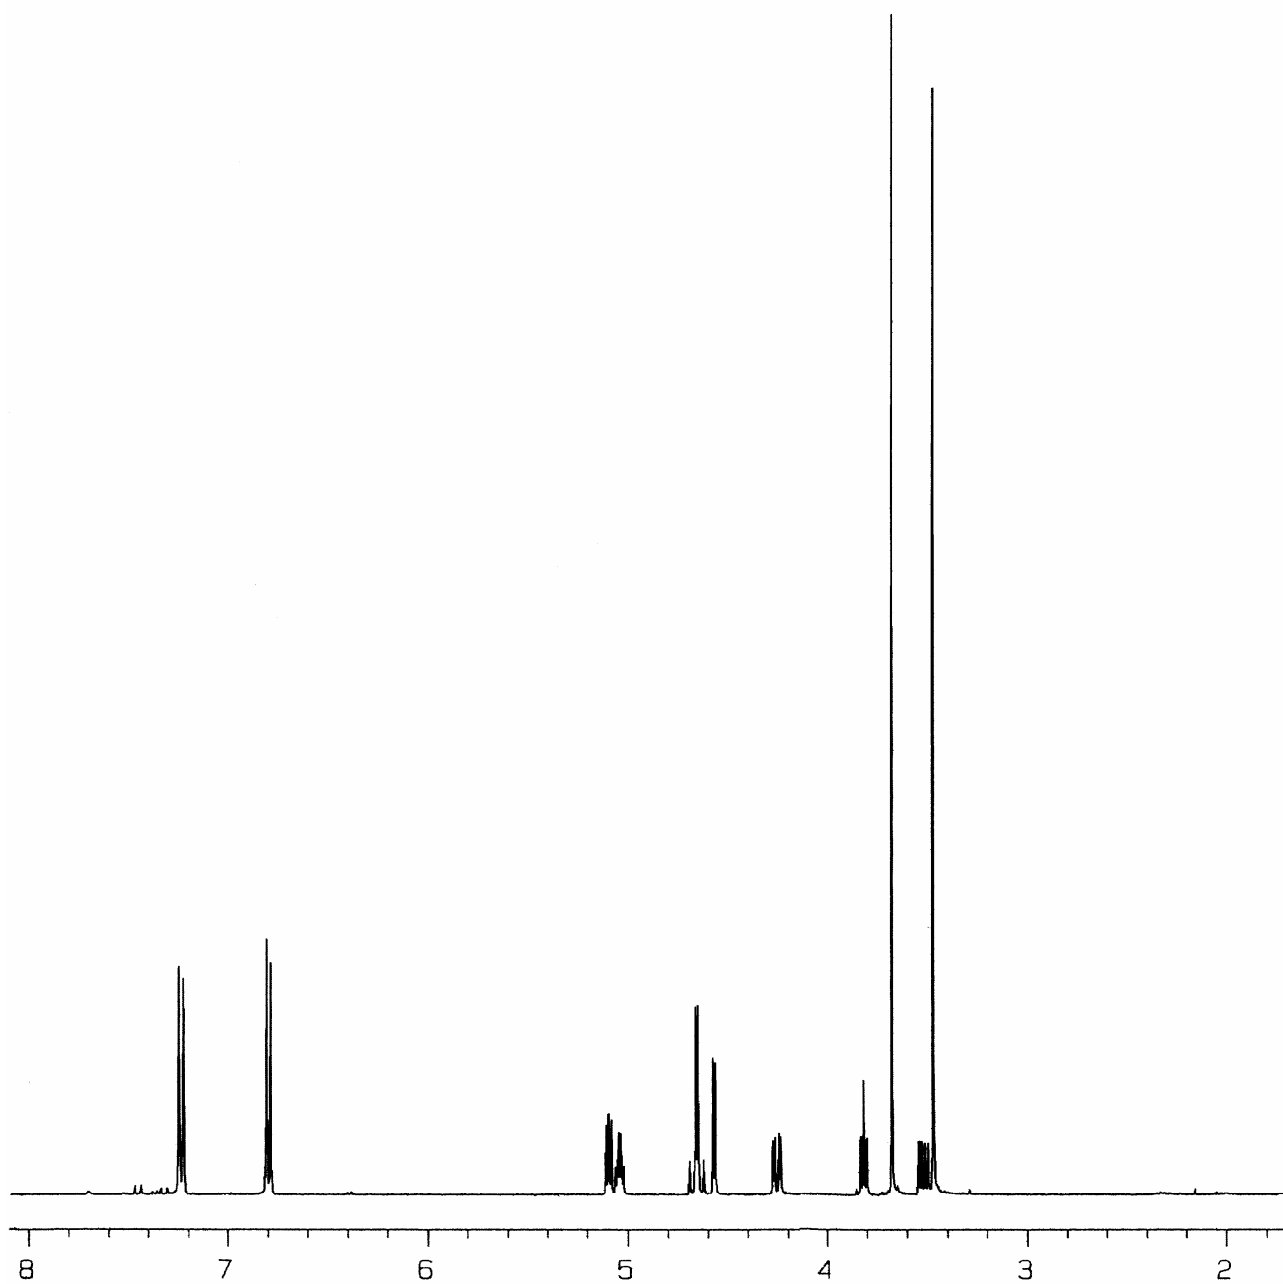

Figure S13.  $^1\text{H}$  NMR of methyl 2,4-di-*O*-(*E*)-cinnamoyl-*d*<sub>7</sub>-3-*O*-*p*-methoxybenzyl- $\beta$ -D-xylopyranoside (**4d<sub>14</sub>**).

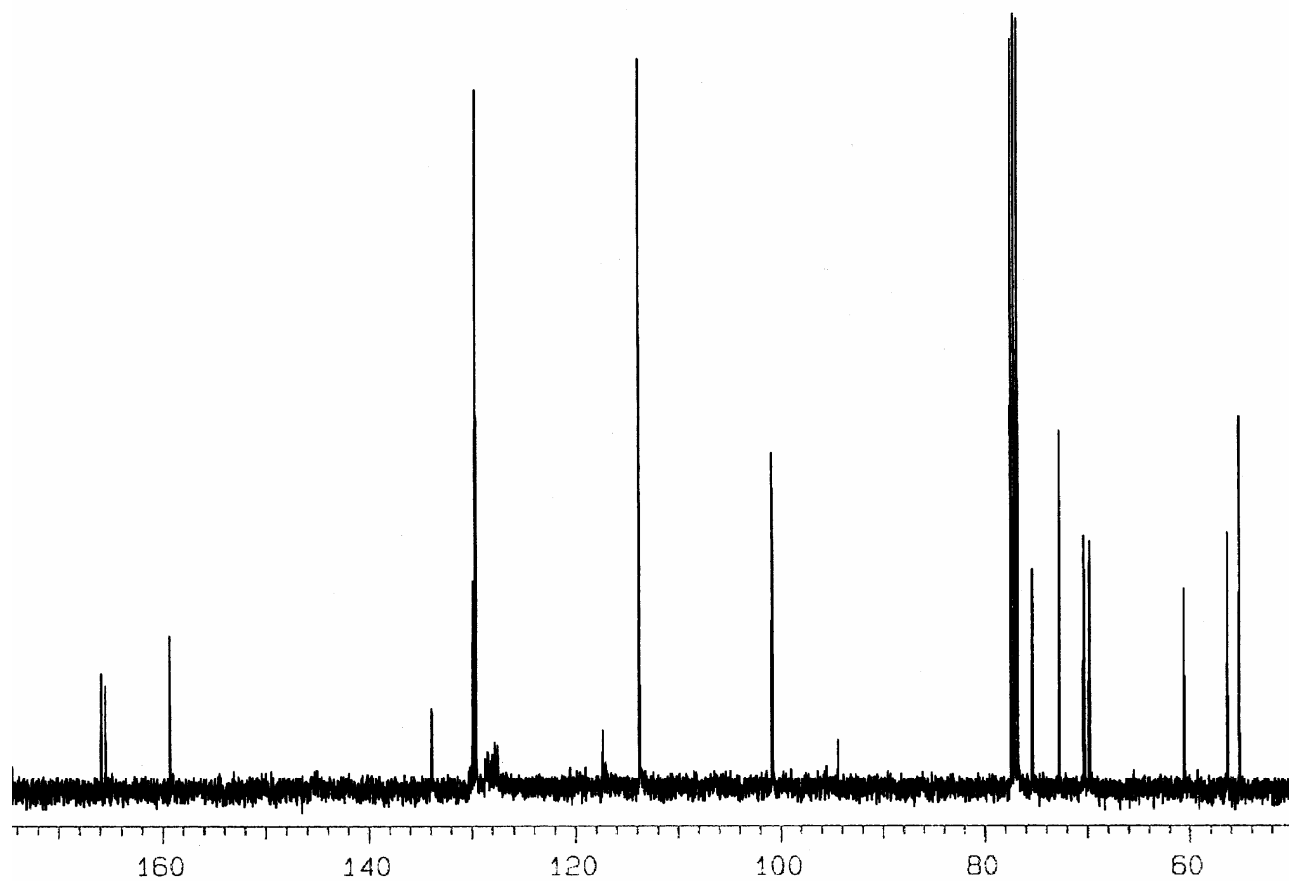

Figure S14.  $^{13}\text{C}$  NMR of methyl 2,4-di-*O*-(*E*)-cinnamoyl-*d*<sub>7</sub>-3-*O*-*p*-methoxybenzyl- $\beta$ -D-xylopyranoside (**4d<sub>14</sub>**).



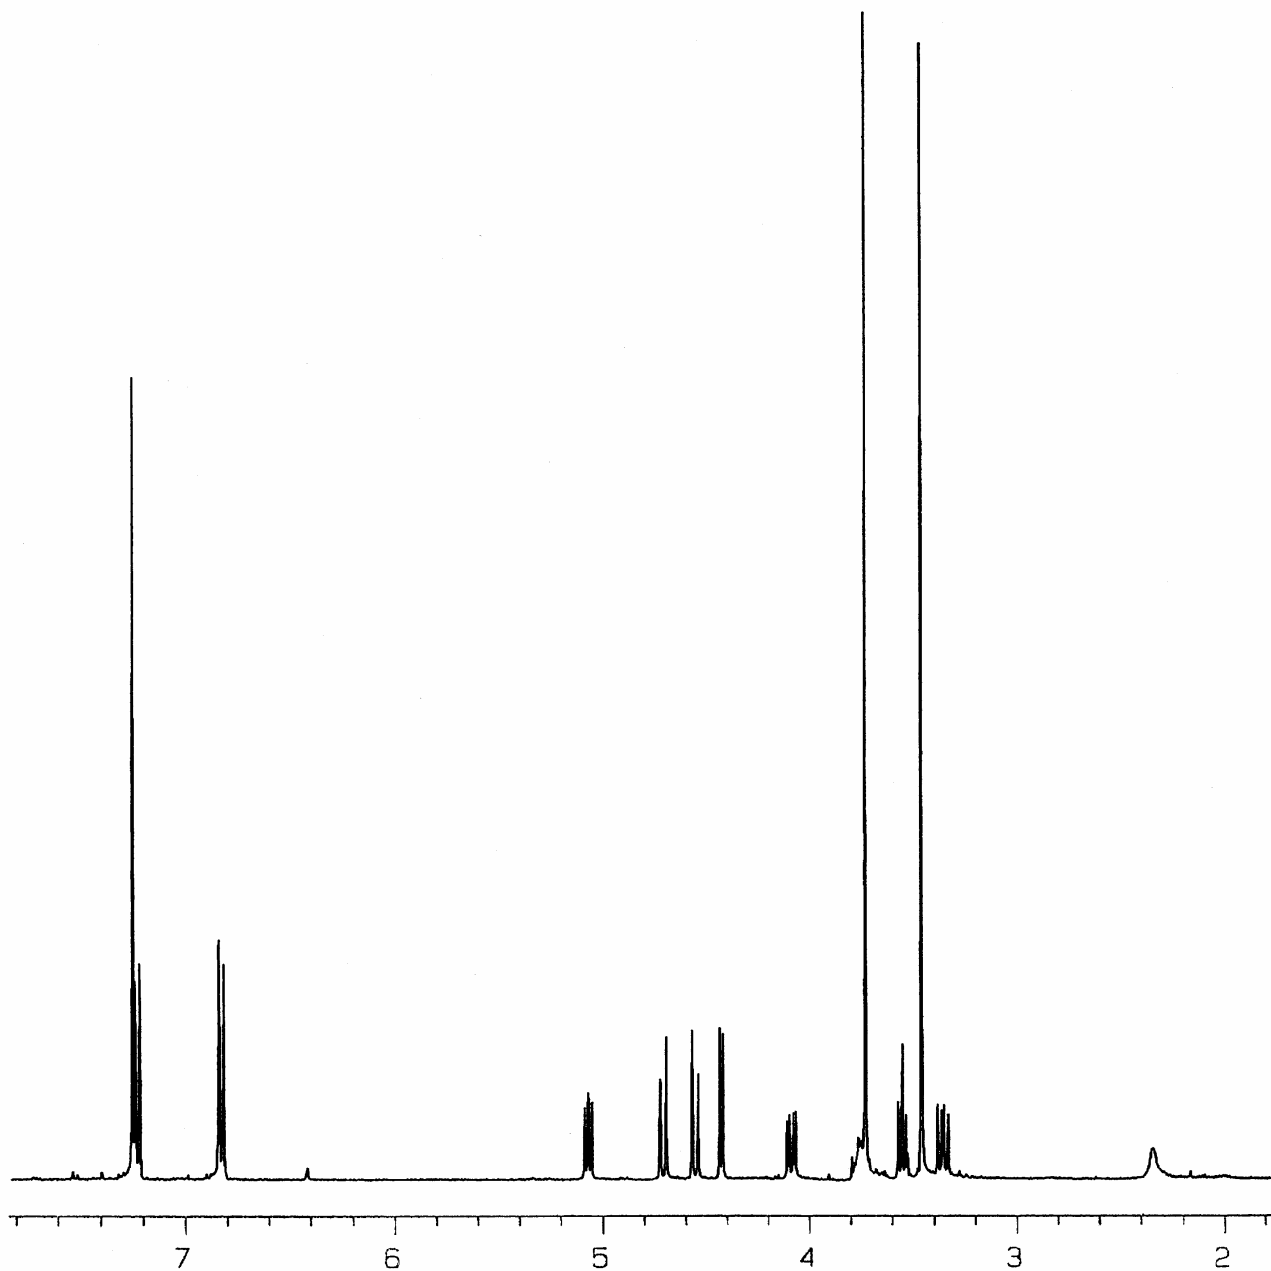

Figure S15.  $^1\text{H}$  NMR of methyl 2-*O*-(*E*)-cinnamoyl-*d*<sub>7</sub>-3-*O*-*p*-methoxybenzyl- $\beta$ -D-xylopyranoside (**6**).

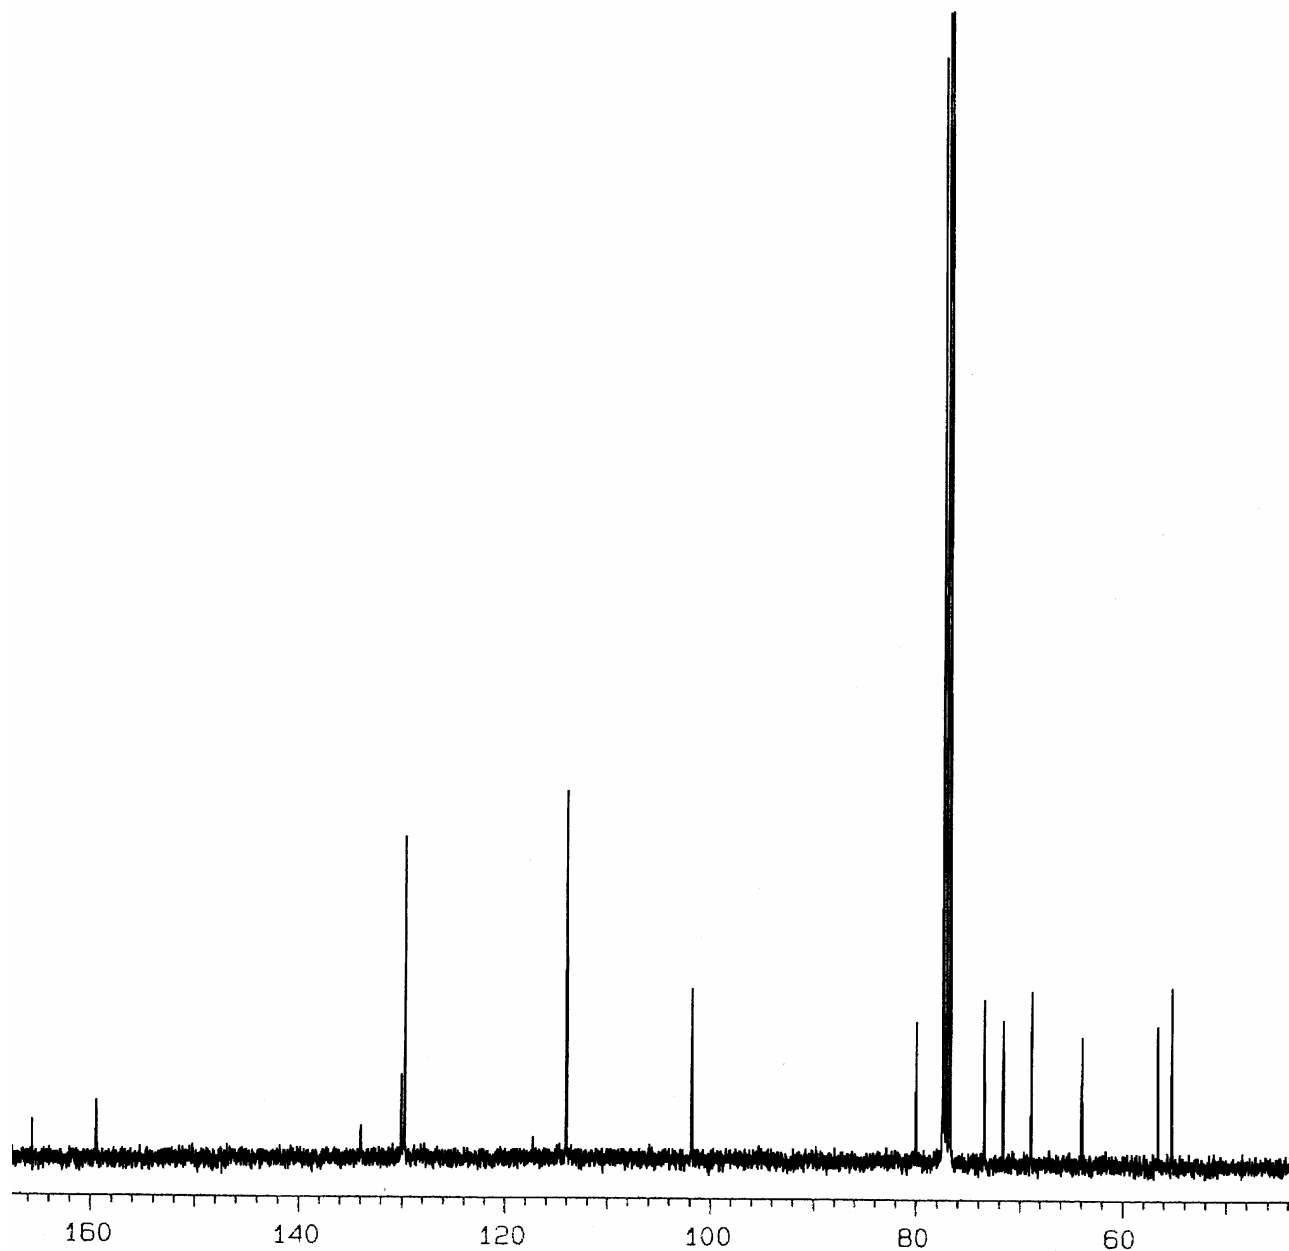

Figure S16.  $^{13}\text{C}$  NMR of methyl 2-*O*-(*E*)-cinnamoyl-*d*-7-3-*O*-*p*-methoxybenzyl- $\beta$ -D-xylopyranoside (**6**).

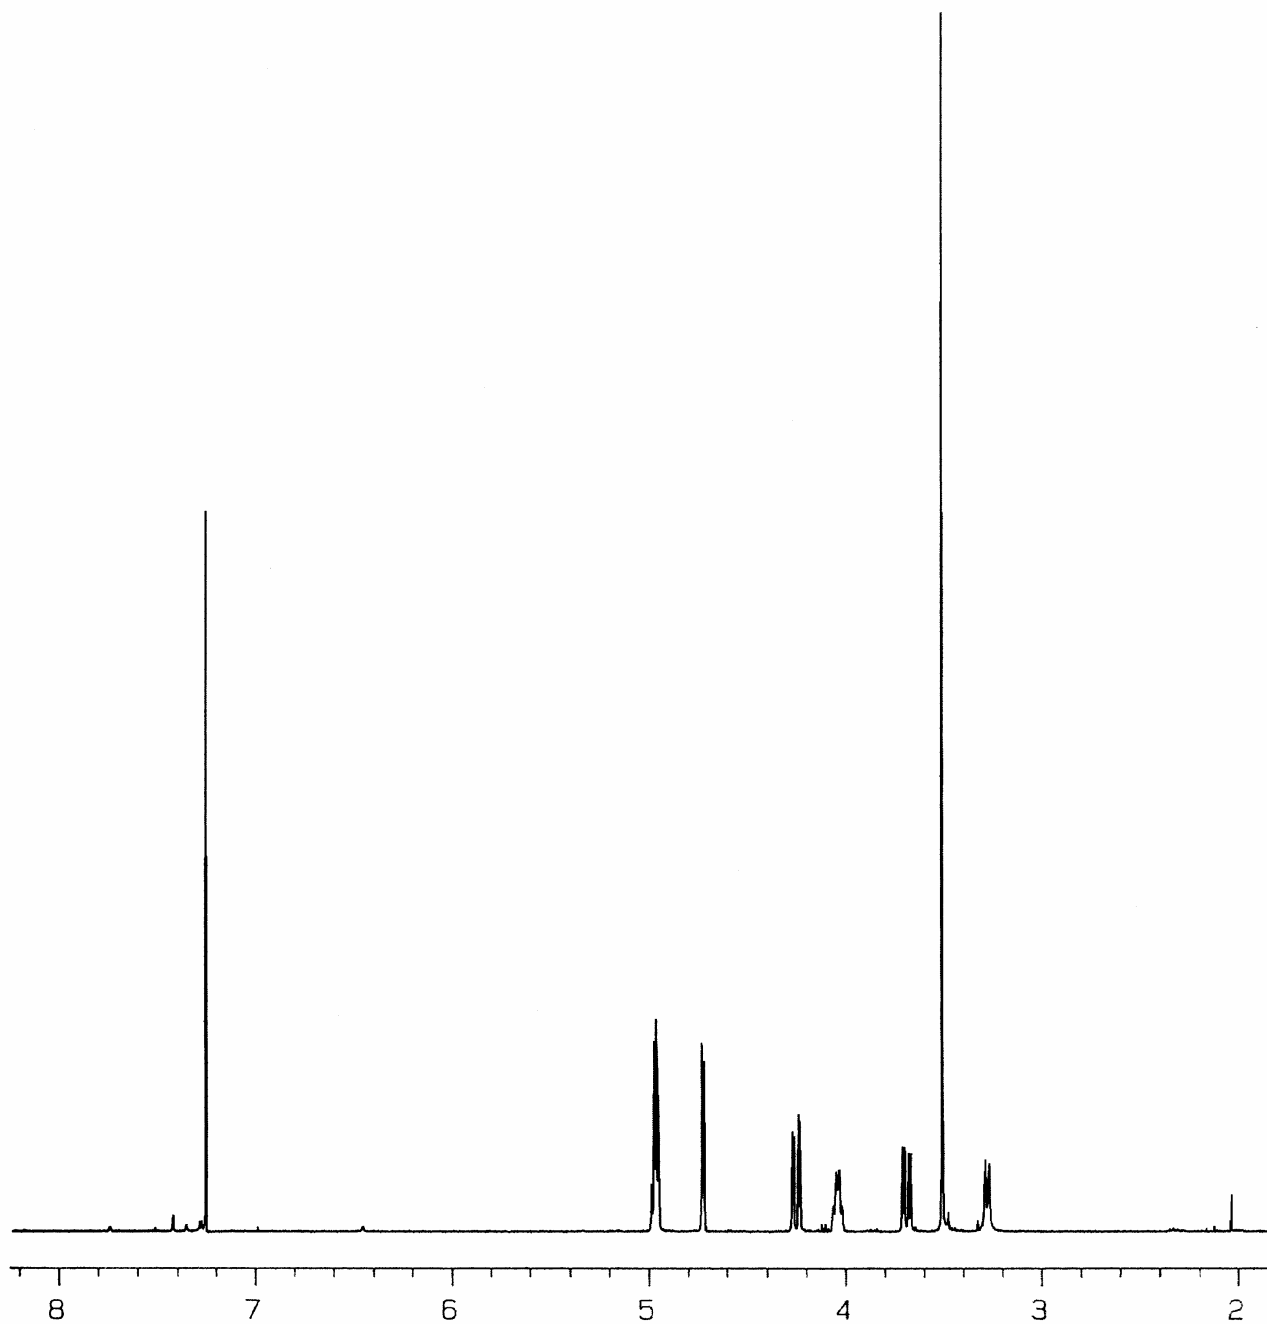

Figure S17. <sup>1</sup>H NMR of methyl 2,4-di-*O*-(*E*)-cinnamoyl-*d*<sub>7</sub>-β-D-xylopyranoside (**5d<sub>14</sub>**).

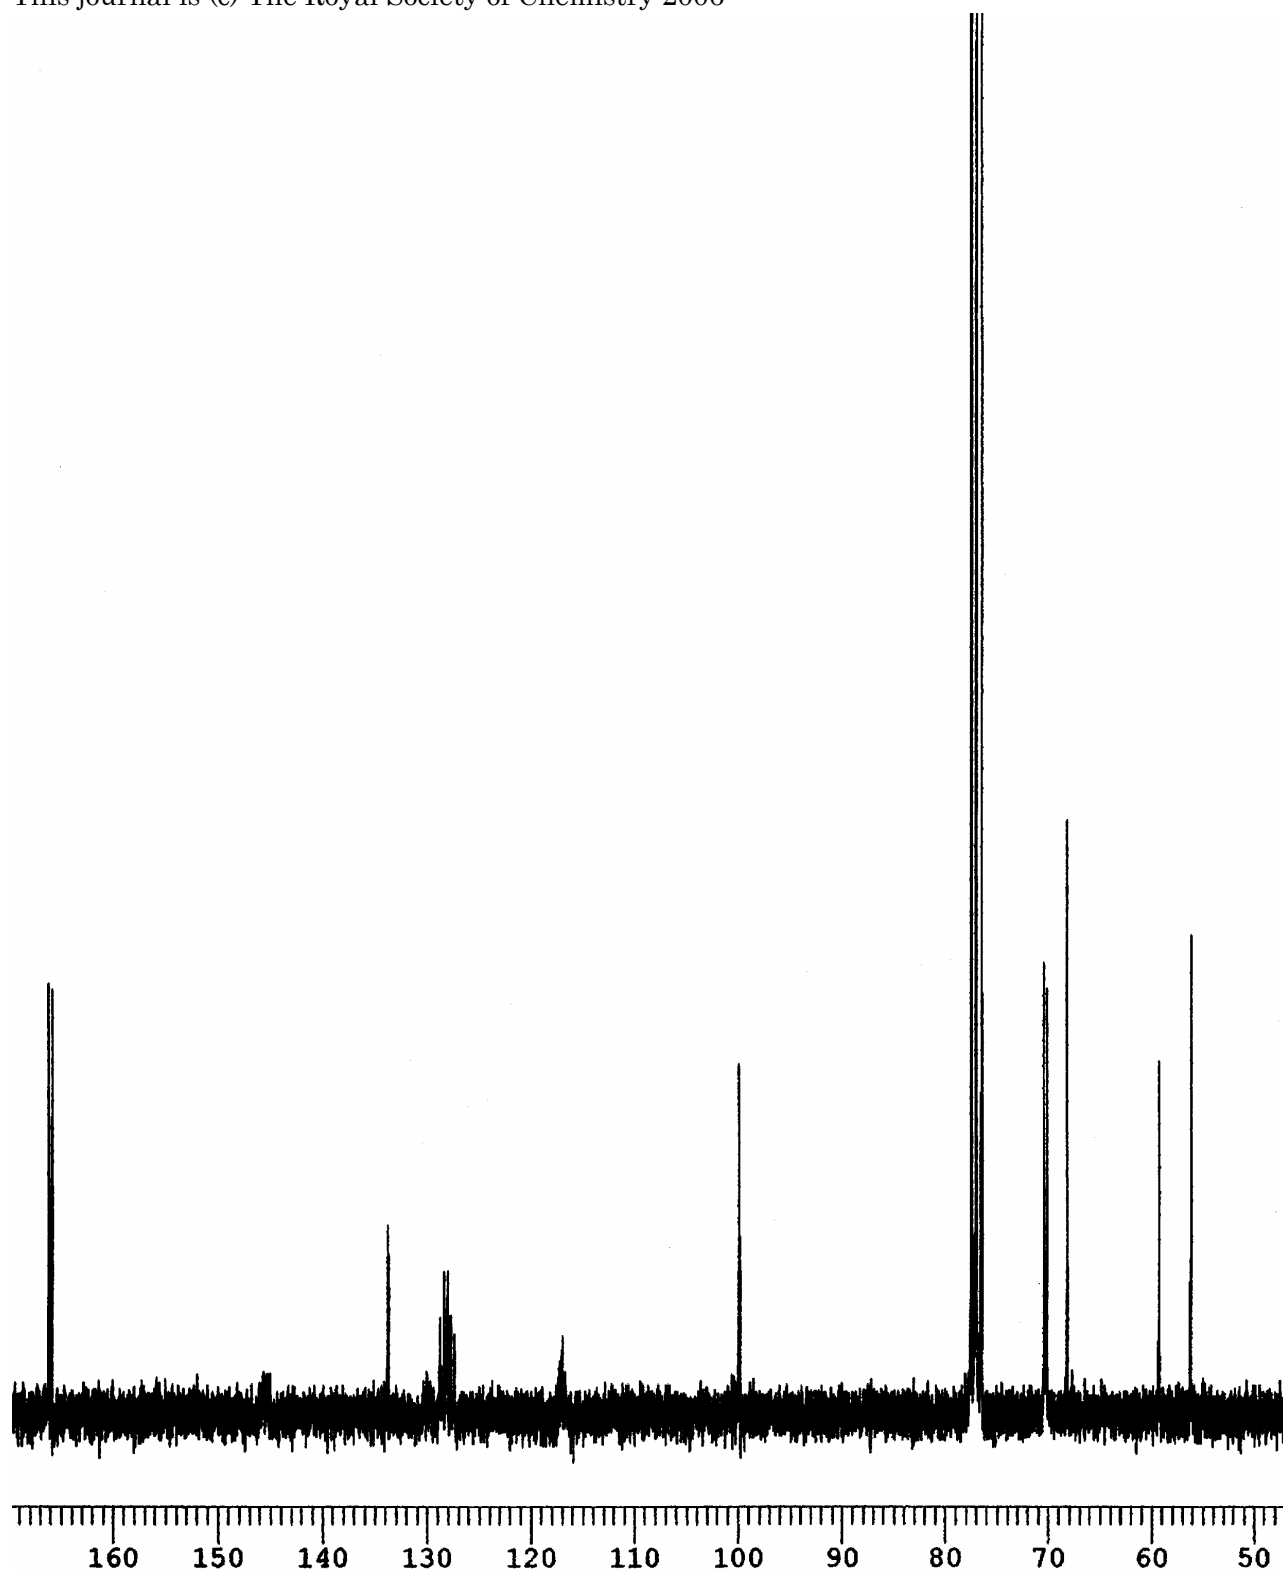

Figure S18.  $^{13}\text{C}$  NMR of methyl 2,4-di-*O*-(*E*)-cinnamoyl- $d_7$ - $\beta$ -D-xylopyranoside (**5d<sub>14</sub>**).

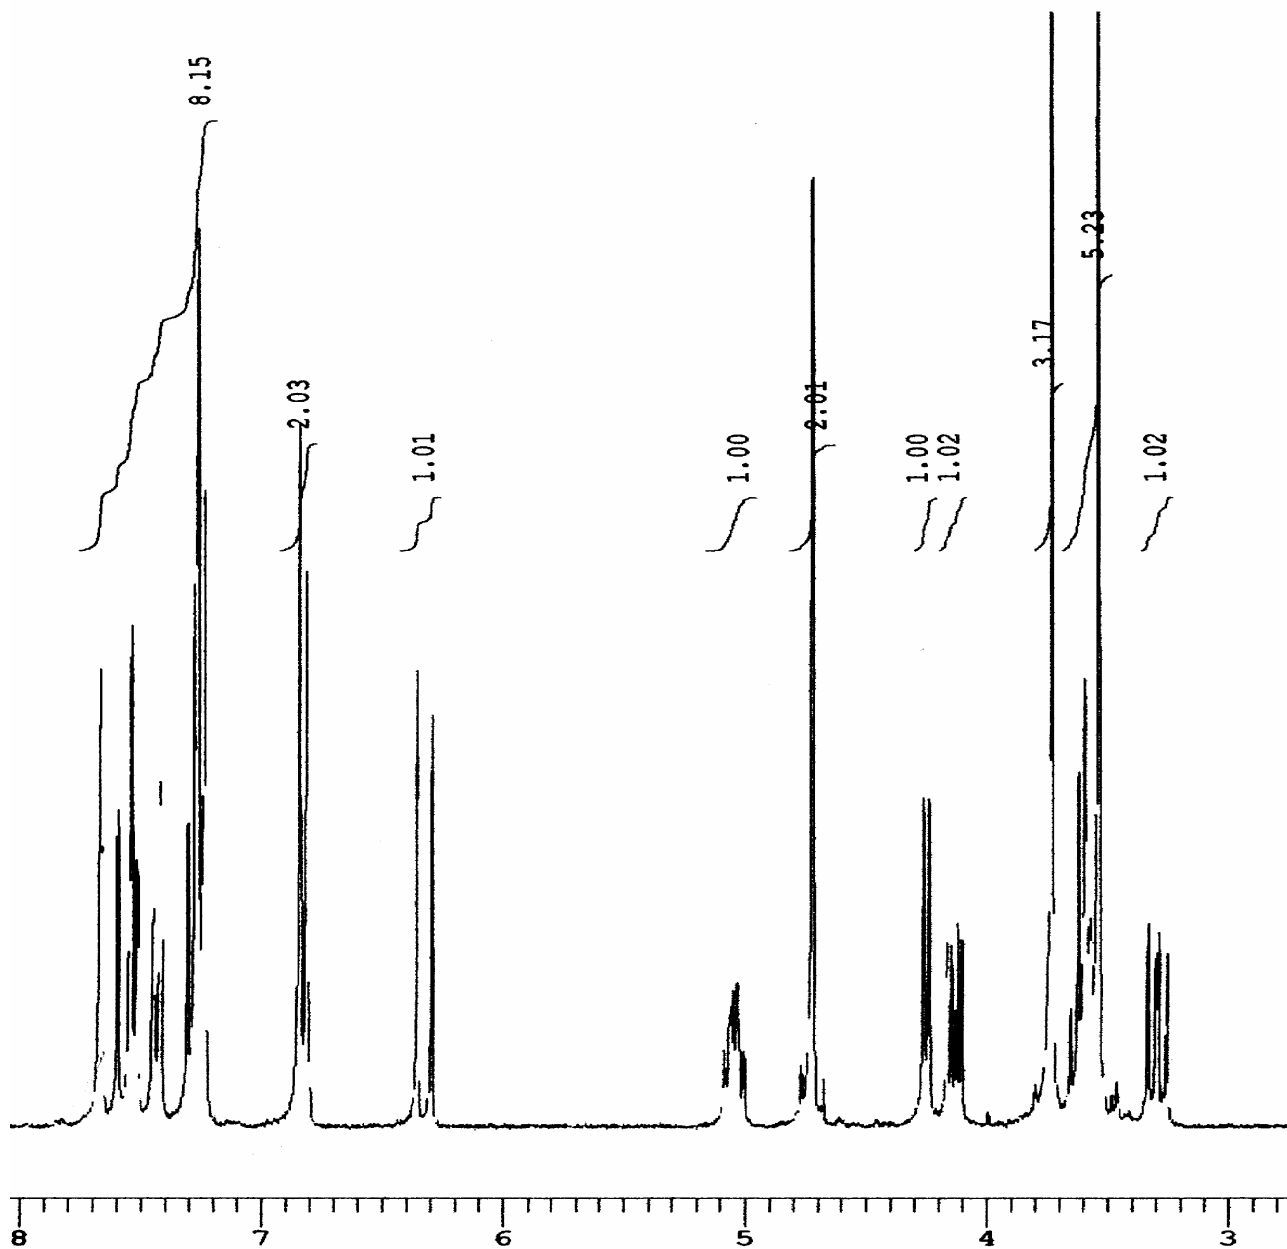

Figure S19. <sup>1</sup>H NMR of methyl 4-*O*-(*E*)-3-bromocinnamoyl-3-*O*-*p*-methoxybenzyl-β-D-xylopyranoside (**3Br**).

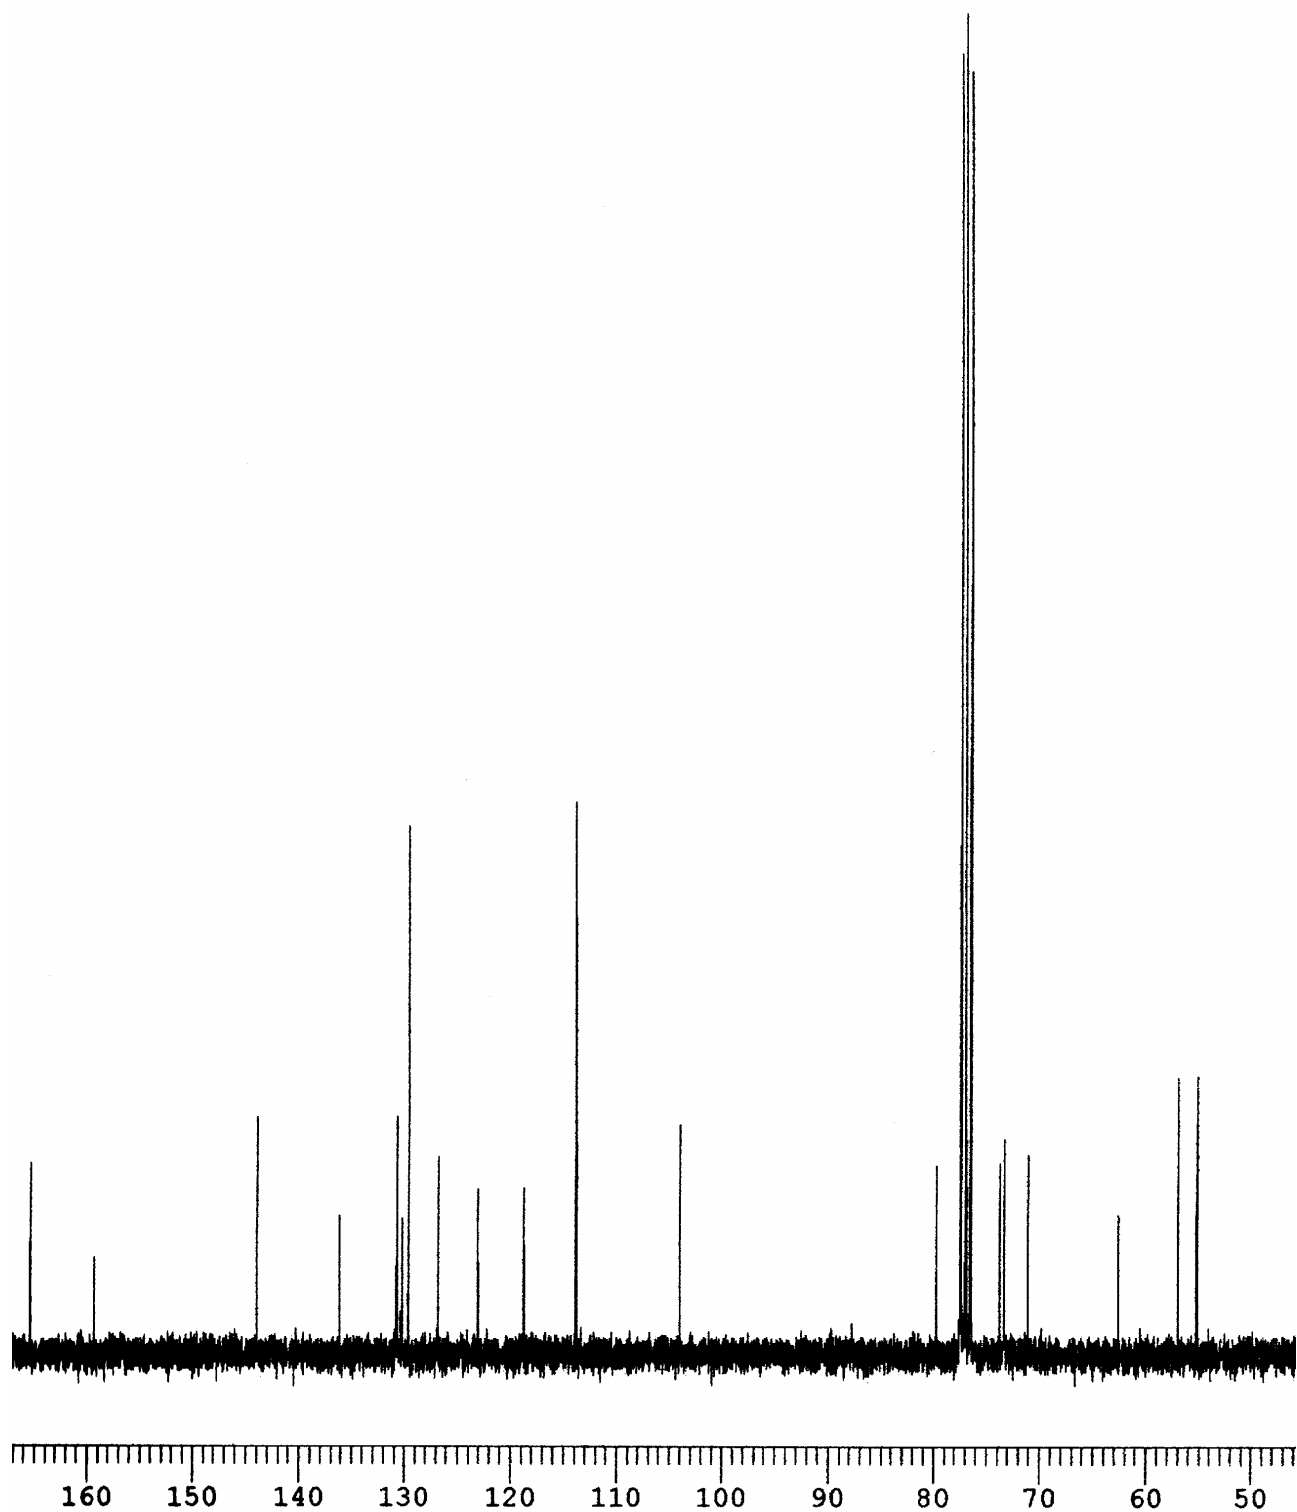

Figure S20.  $^{13}\text{C}$  NMR of methyl 4-*O*-(*E*)-3-bromocinnamoyl-3-*O*-*p*-methoxybenzyl- $\beta$ -D-xylopyranoside (**3Br**).

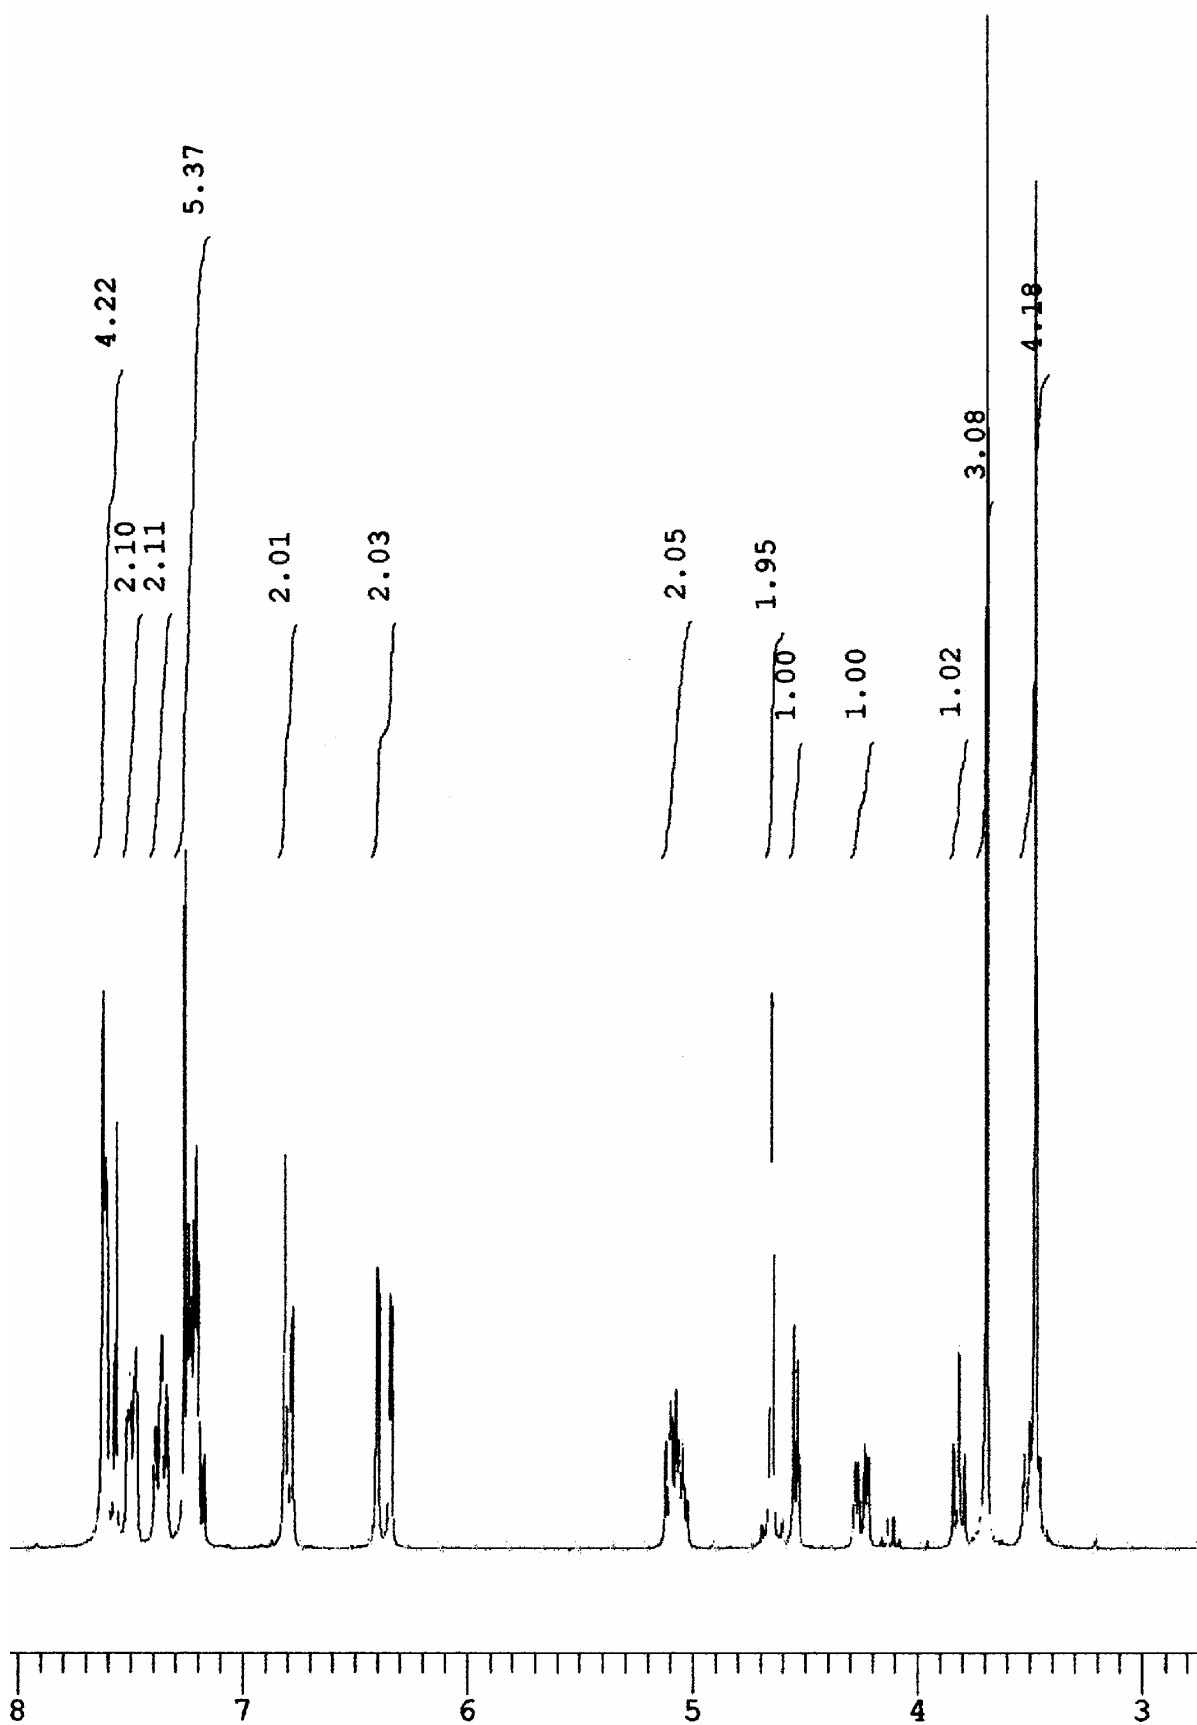

Figure S21. <sup>1</sup>H NMR of methyl 2,4-di-*O*-(*E*)-3-bromocinnamoyl-3-*O*-*p*-methoxybenzyl- $\beta$ -D-xylopyranoside

(4Br).

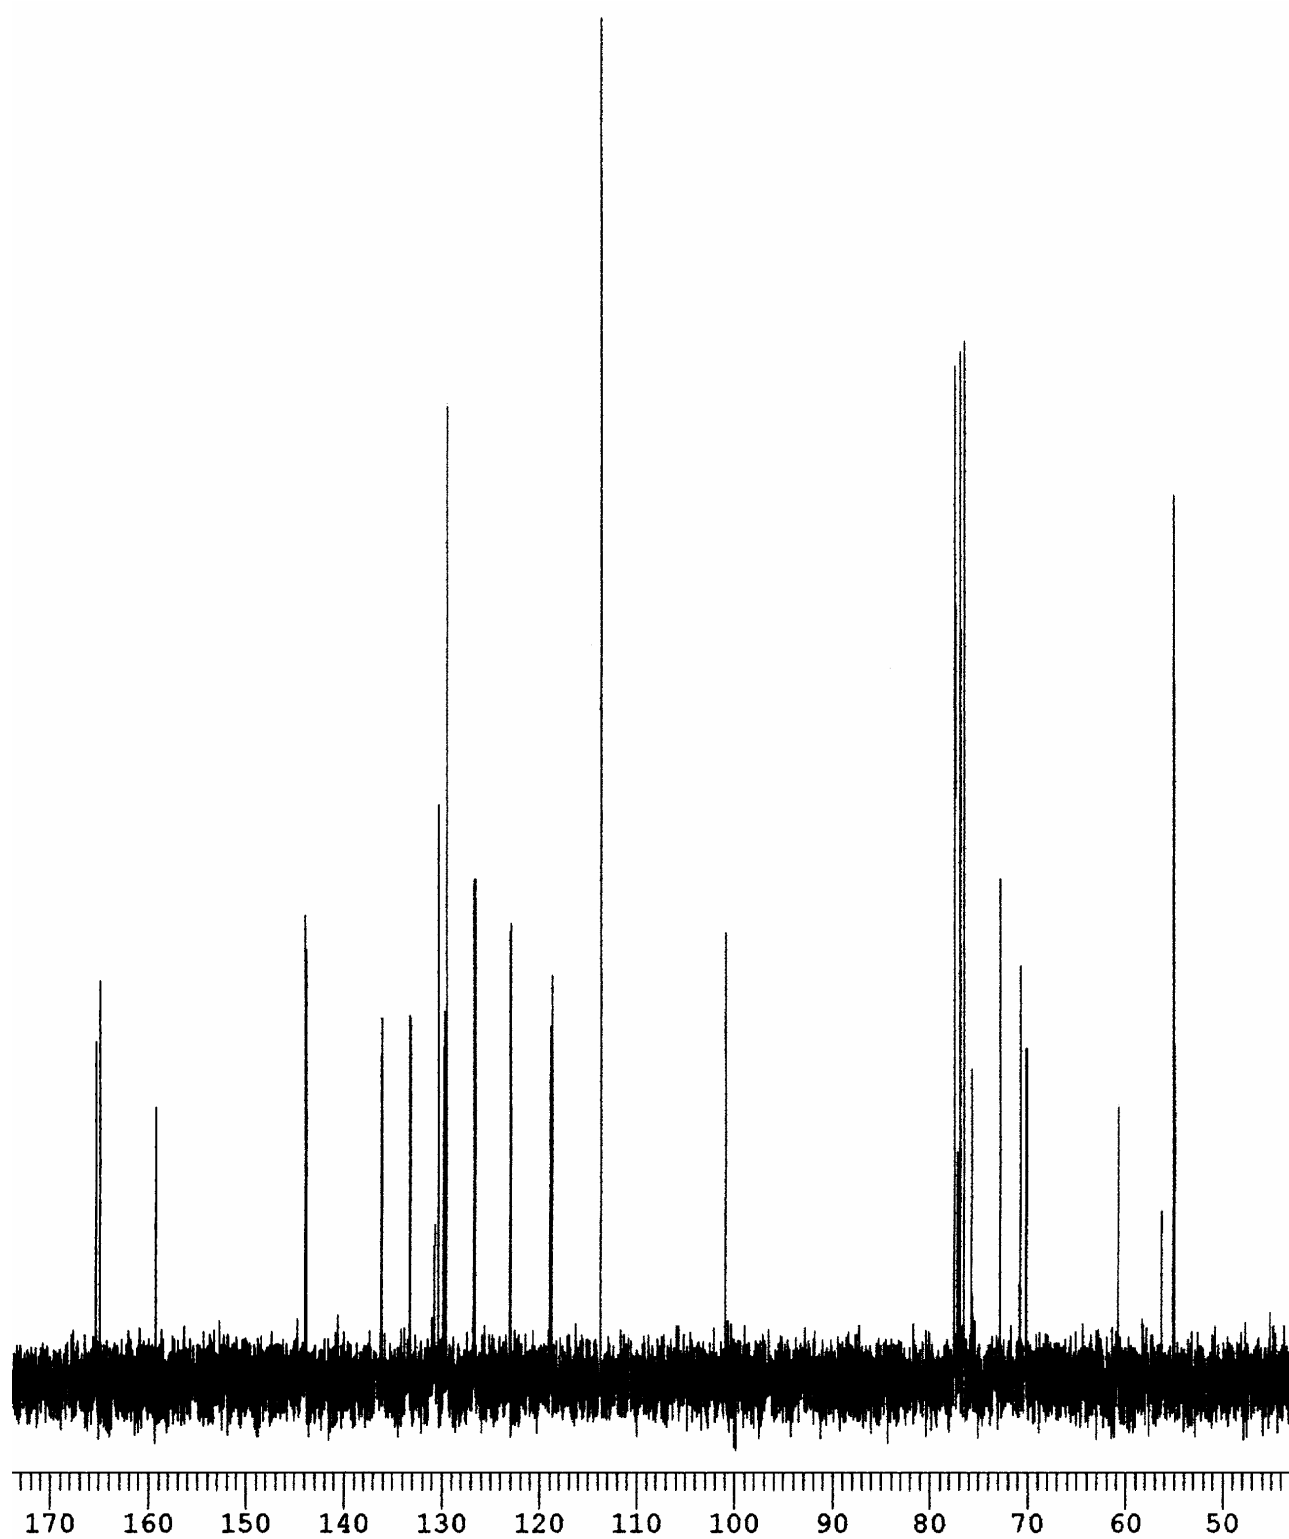

Figure S22.  $^{13}\text{C}$  NMR of methyl 2,4-di-*O*-(*E*)-3-bromocinnamoyl-3-*O*-*p*-methoxybenzyl- $\beta$ -D-xylopyranoside (4Br).



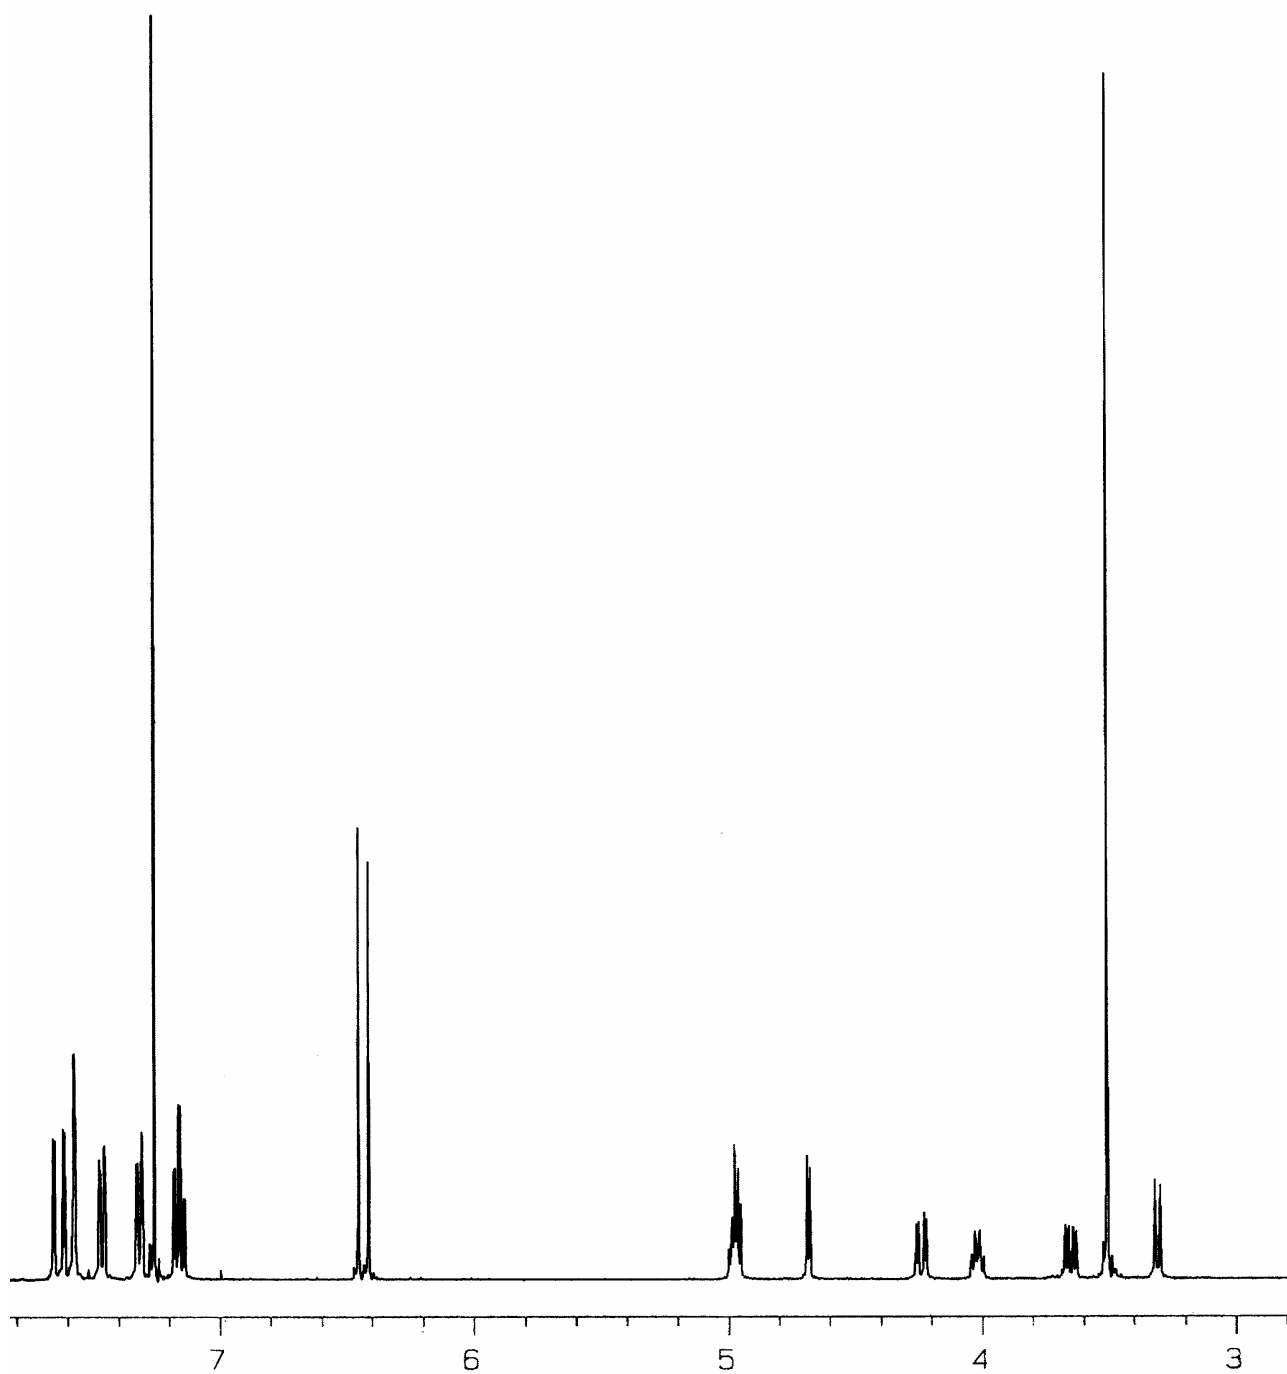

Figure S23.  $^1\text{H}$  NMR of methyl 2,4-di-*O*-(*E*)-3-bromocinnamoyl- $\beta$ -D-xylopyranoside (**5Br**).

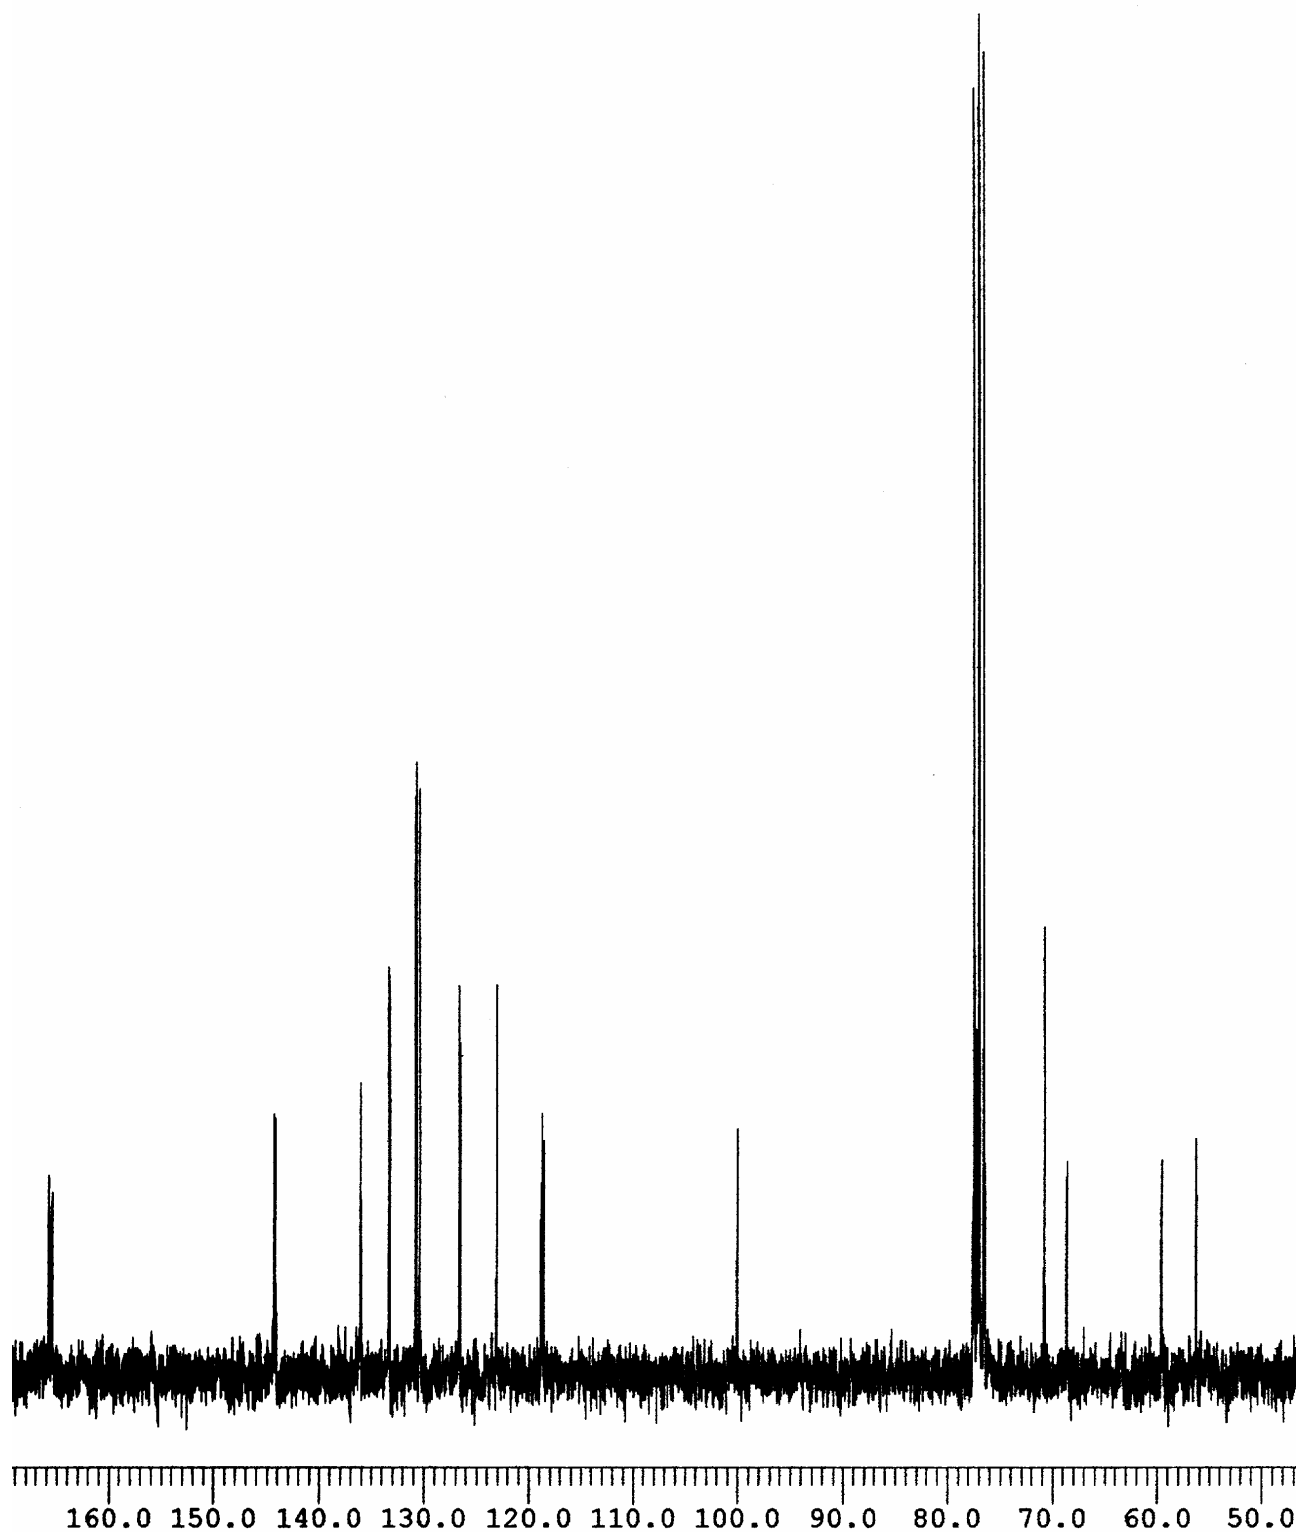

Figure S24.  $^{13}\text{C}$  NMR of methyl 2,4-di-*O*-(*E*)-3-bromocinnamoyl- $\beta$ -D-xylopyranoside (**5Br**).

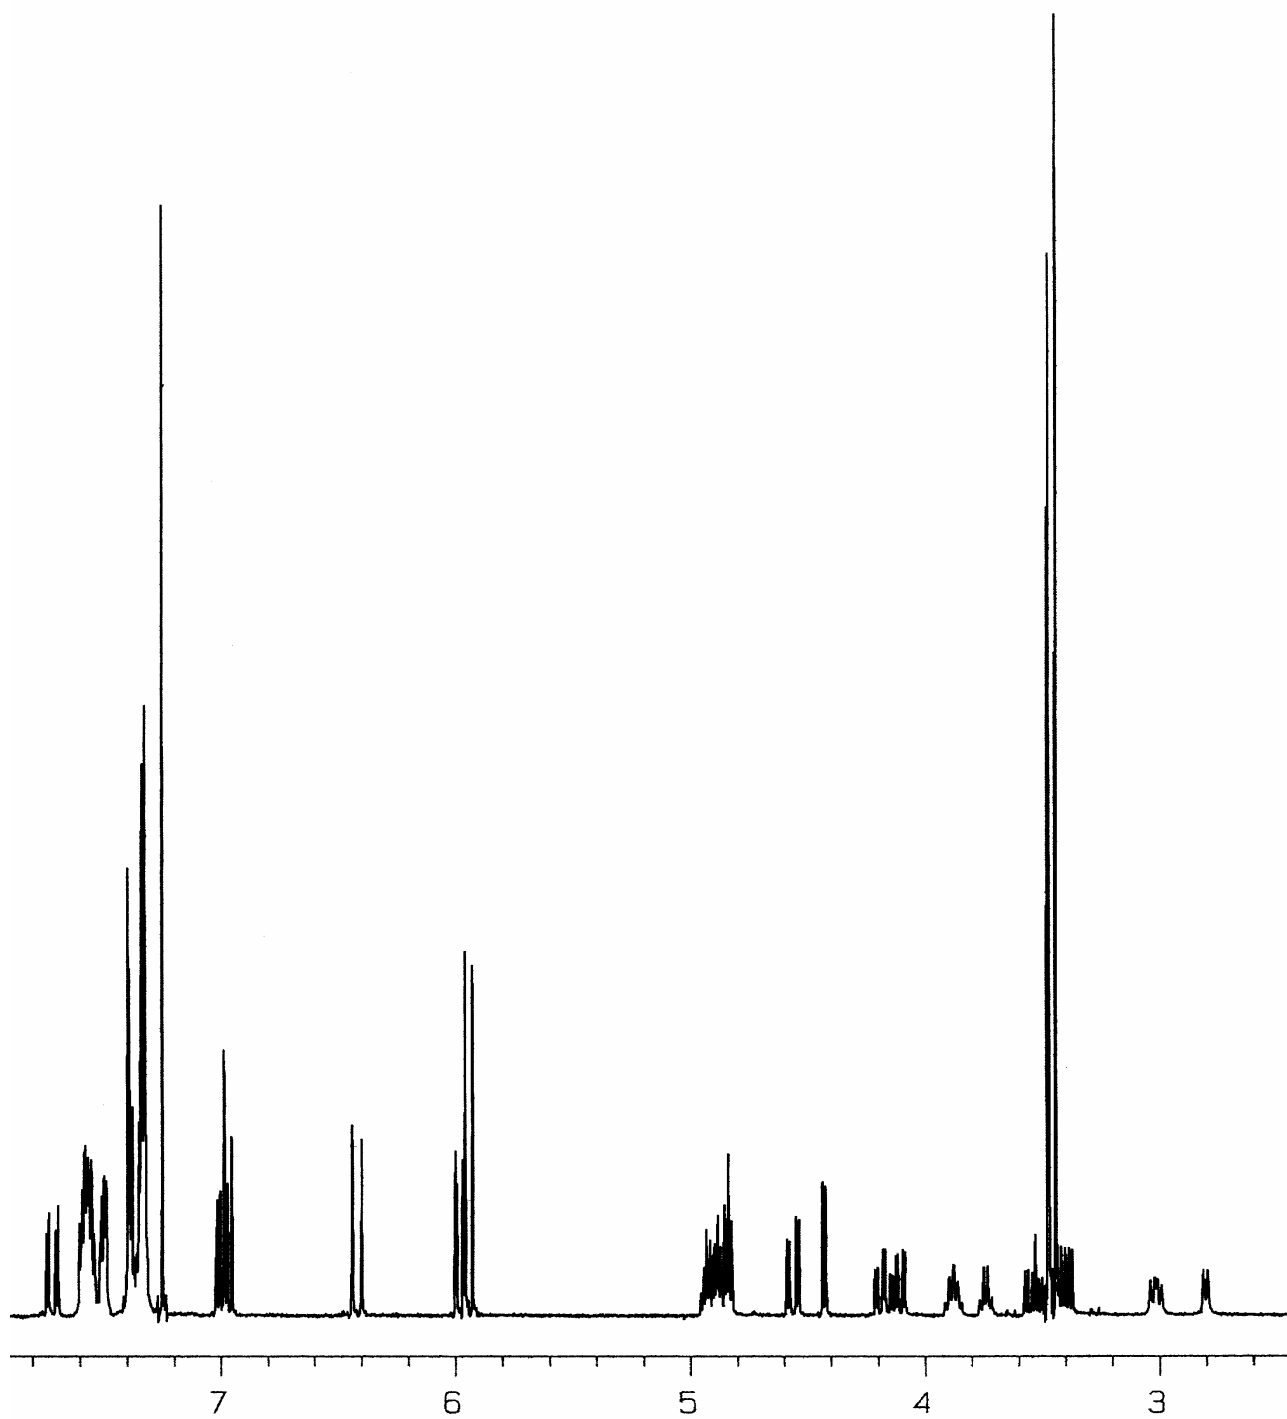

Figure S25.  $^1\text{H}$  NMR for the mixture of **5**<sub>trans-cis</sub>, **5**<sub>trans-cis</sub>, and **5**<sub>trans-cis</sub> (**Fr2**).

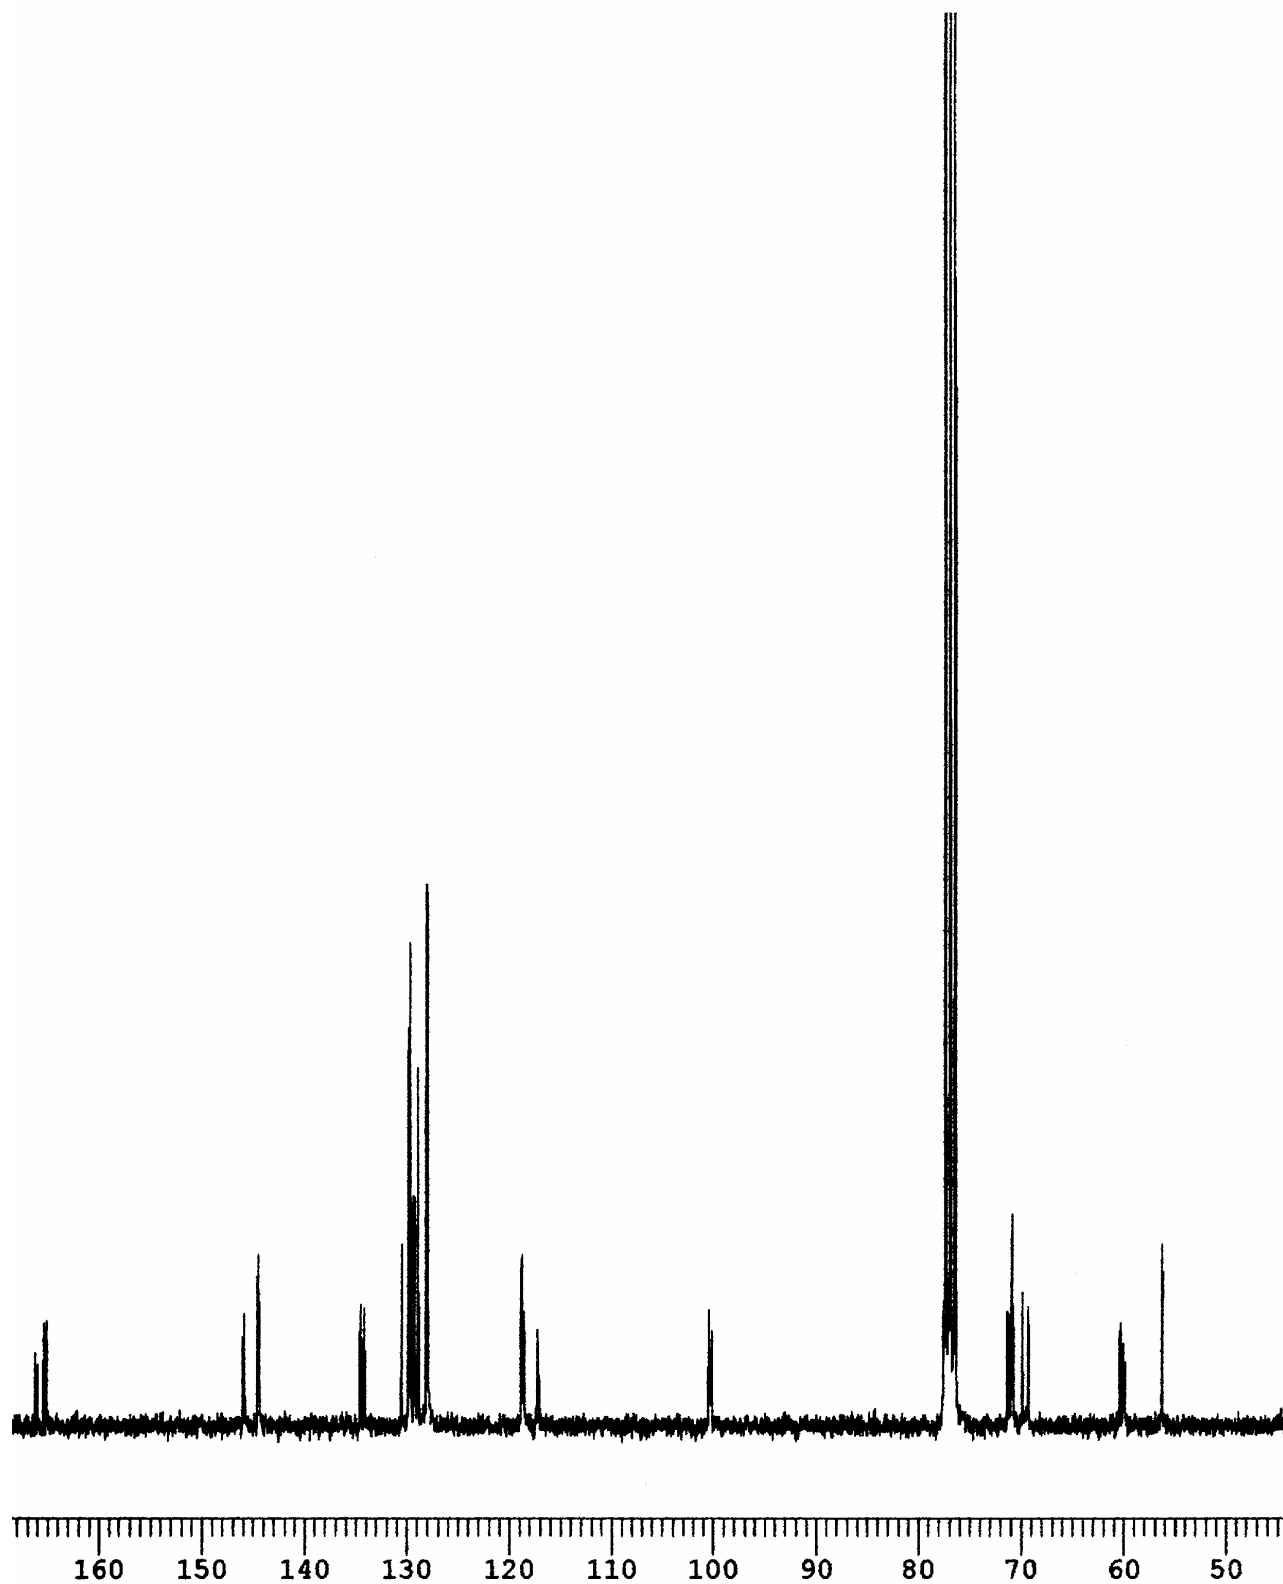

Figure S26.  $^{13}\text{C}$  NMR for the mixture of **5**<sub>trans-cis</sub>, **5**<sub>trans-cis</sub>, and **5**<sub>trans-cis</sub> (**Fr2**).

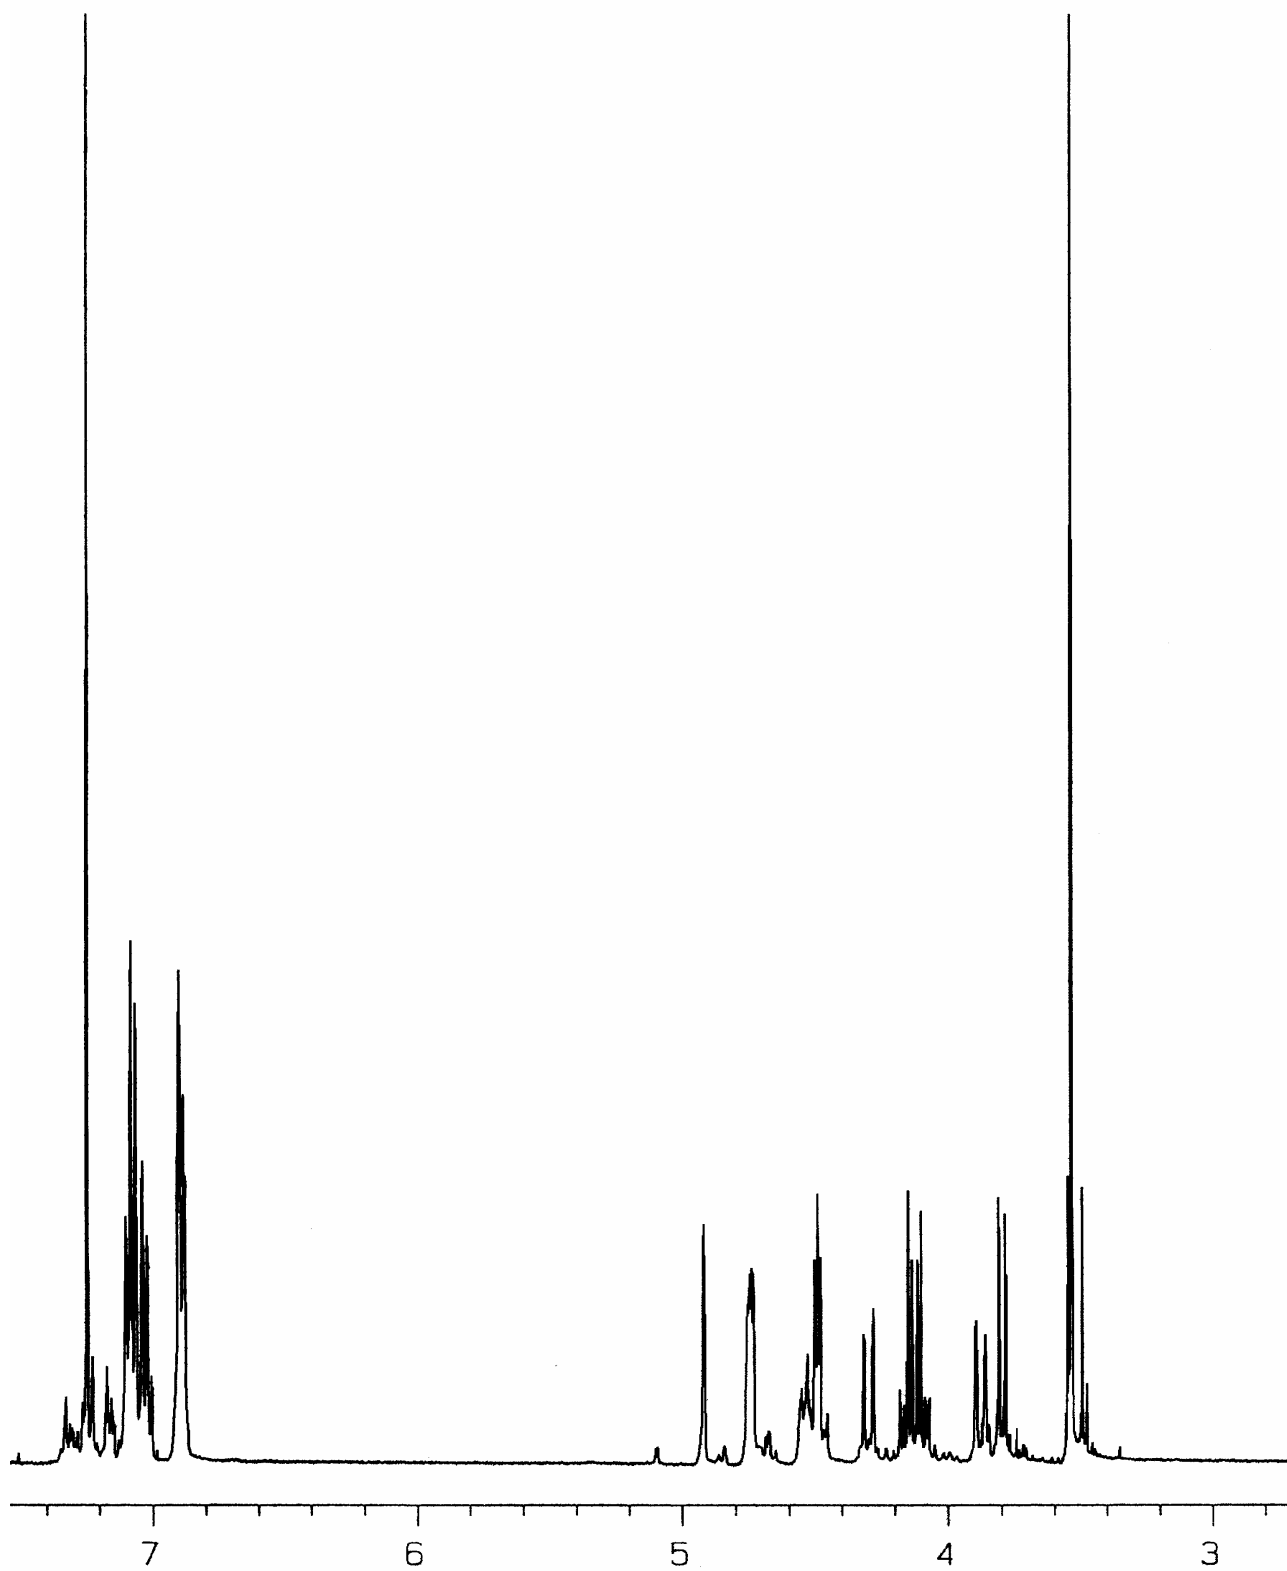

Figure S27.  $^1\text{H}$  NMR of methyl  $\beta$ -D-xylopyranoside-2,4- $\beta$ -truxinate (**7A**).

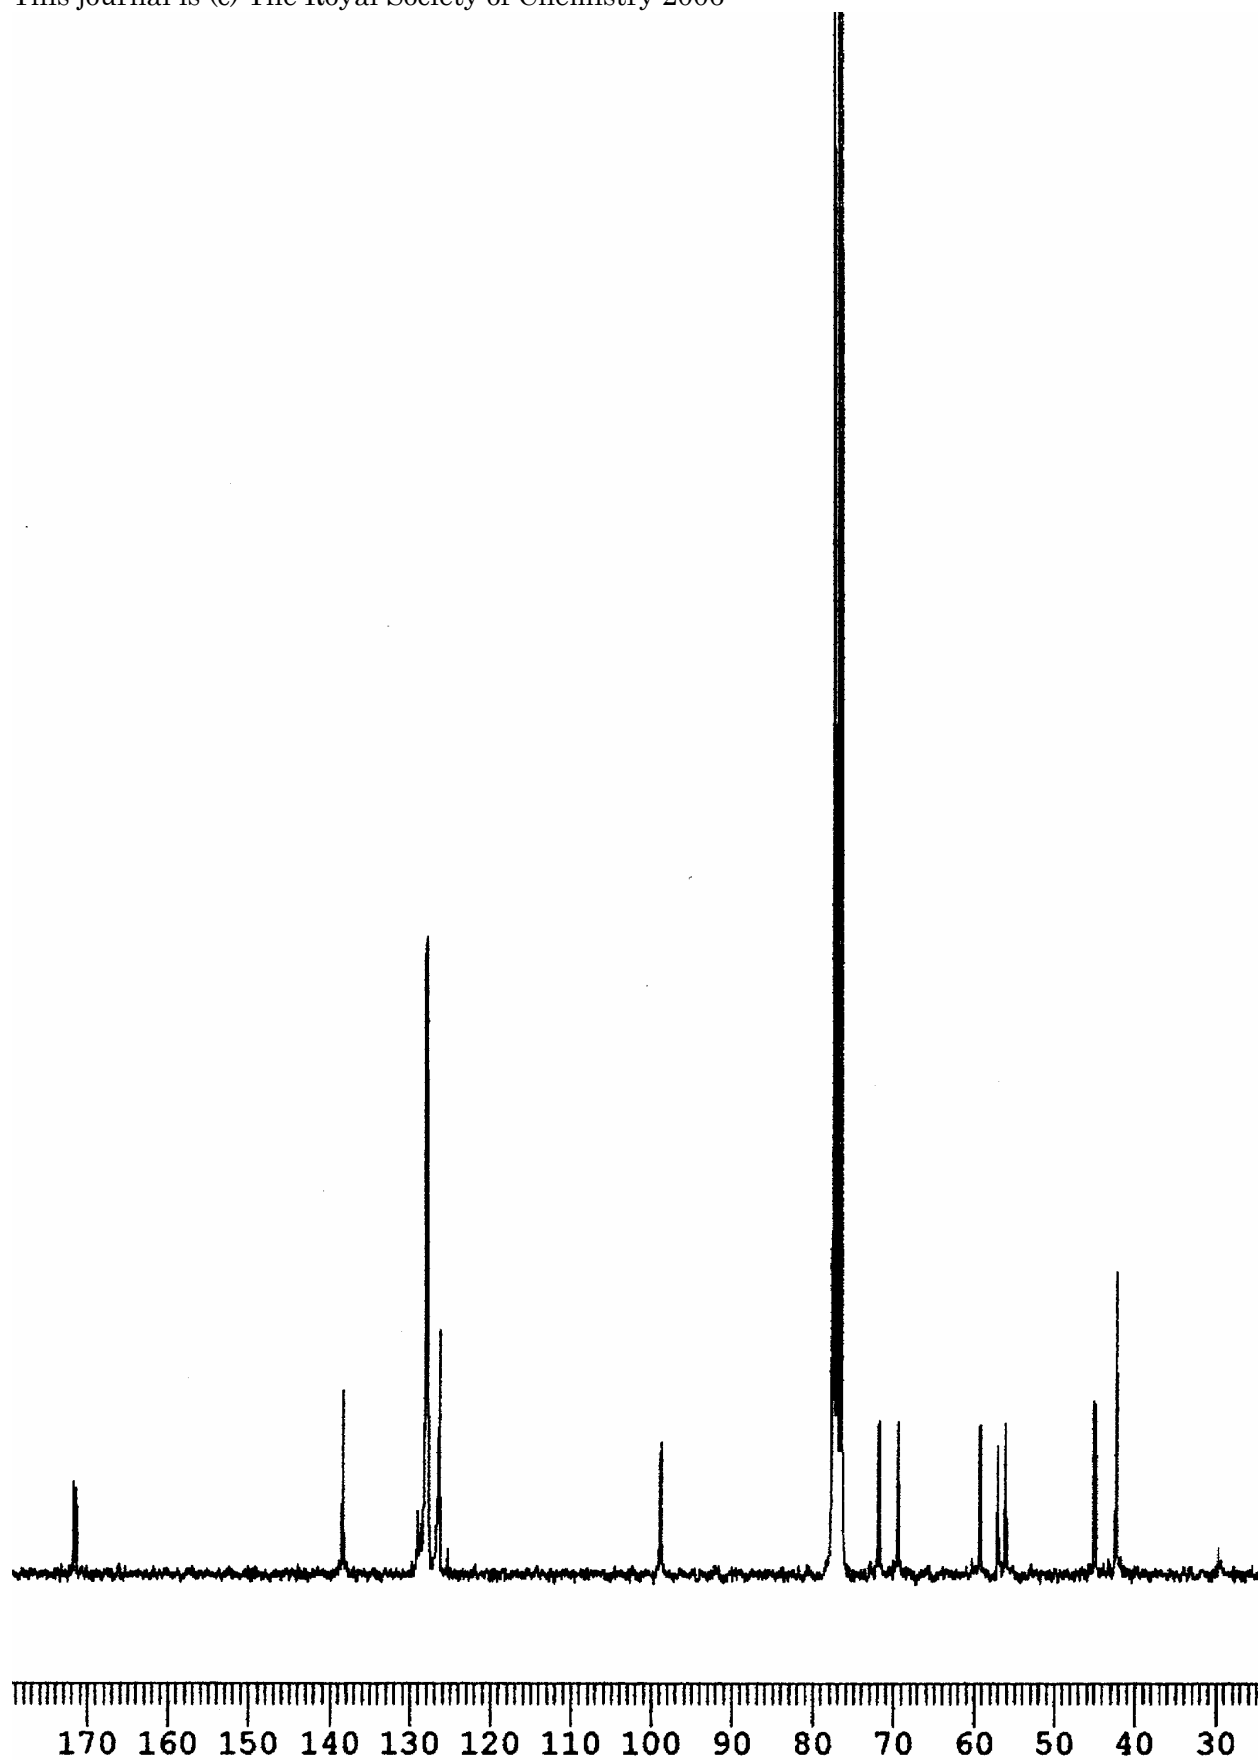

Figure S28.  $^{13}\text{C}$  NMR of methyl  $\beta$ -D-xylopyranoside-2,4- $\beta$ -truxinate (**7A**).

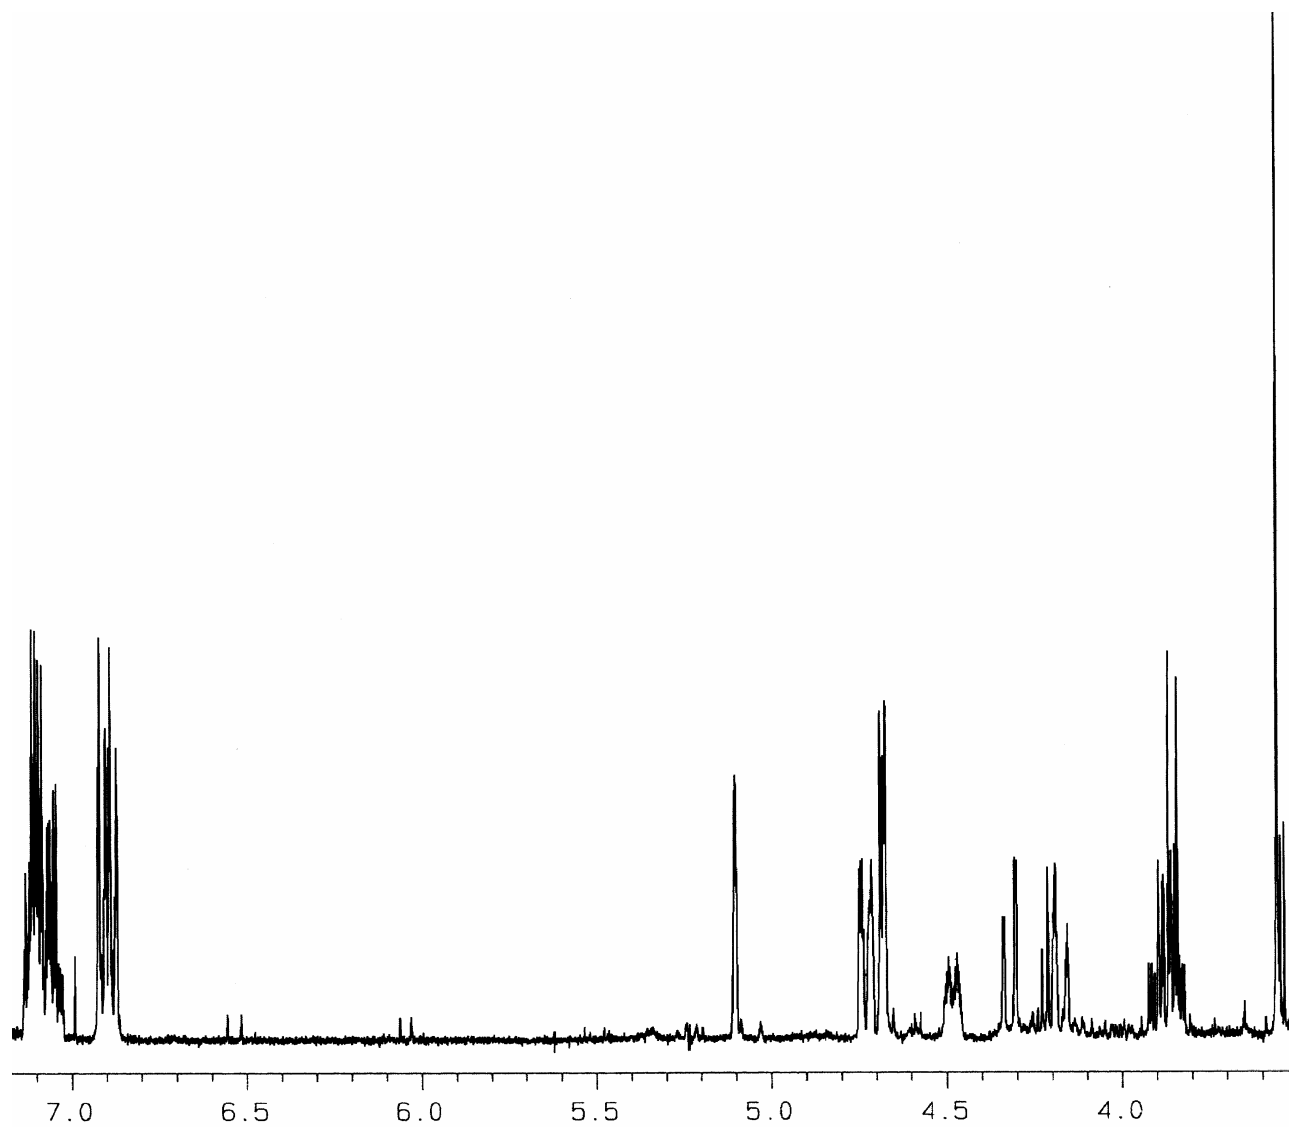

Figure S29.  $^1\text{H}$  NMR of methyl  $\beta$ -D-xylopyranoside-2,4- $\beta$ -truxinate (**7B**).

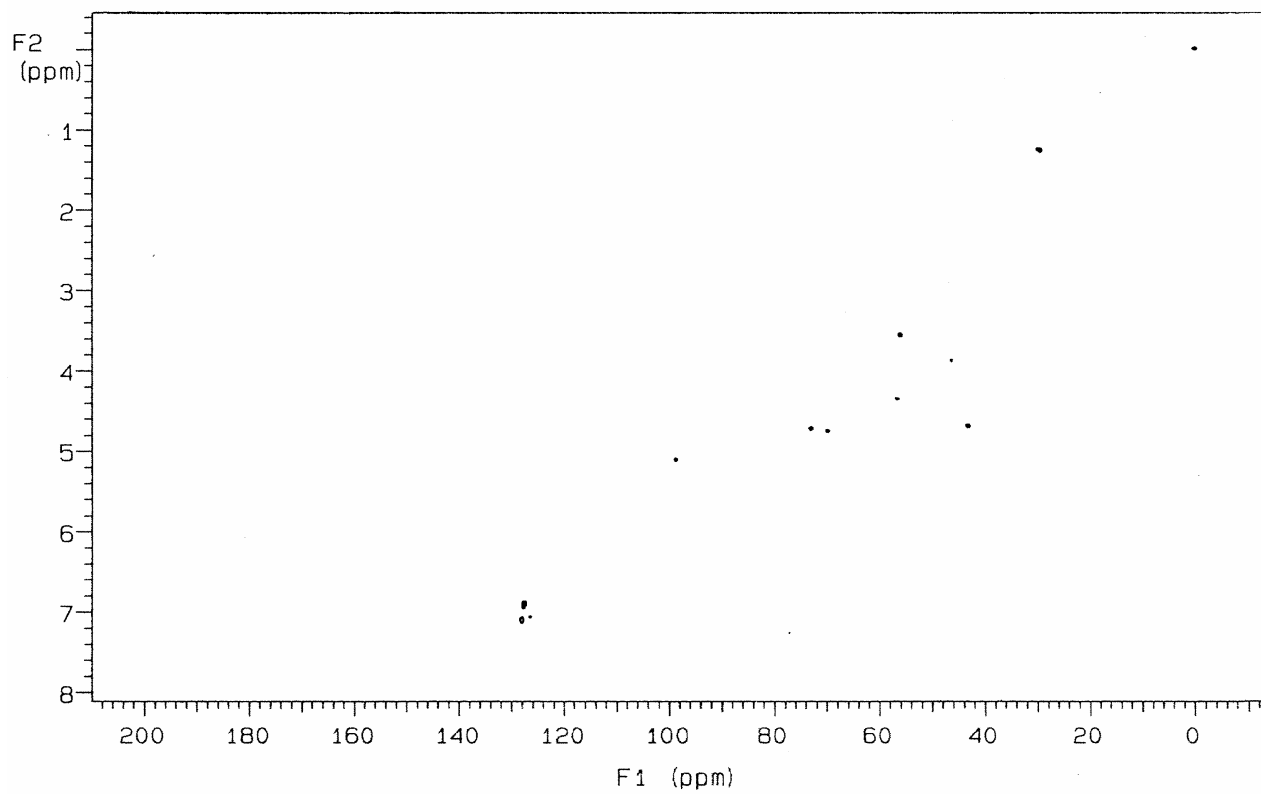

Figure S30. HMQC of methyl  $\beta$ -D-xylopyranoside-2,4- $\beta$ -truxinate (**7B**).



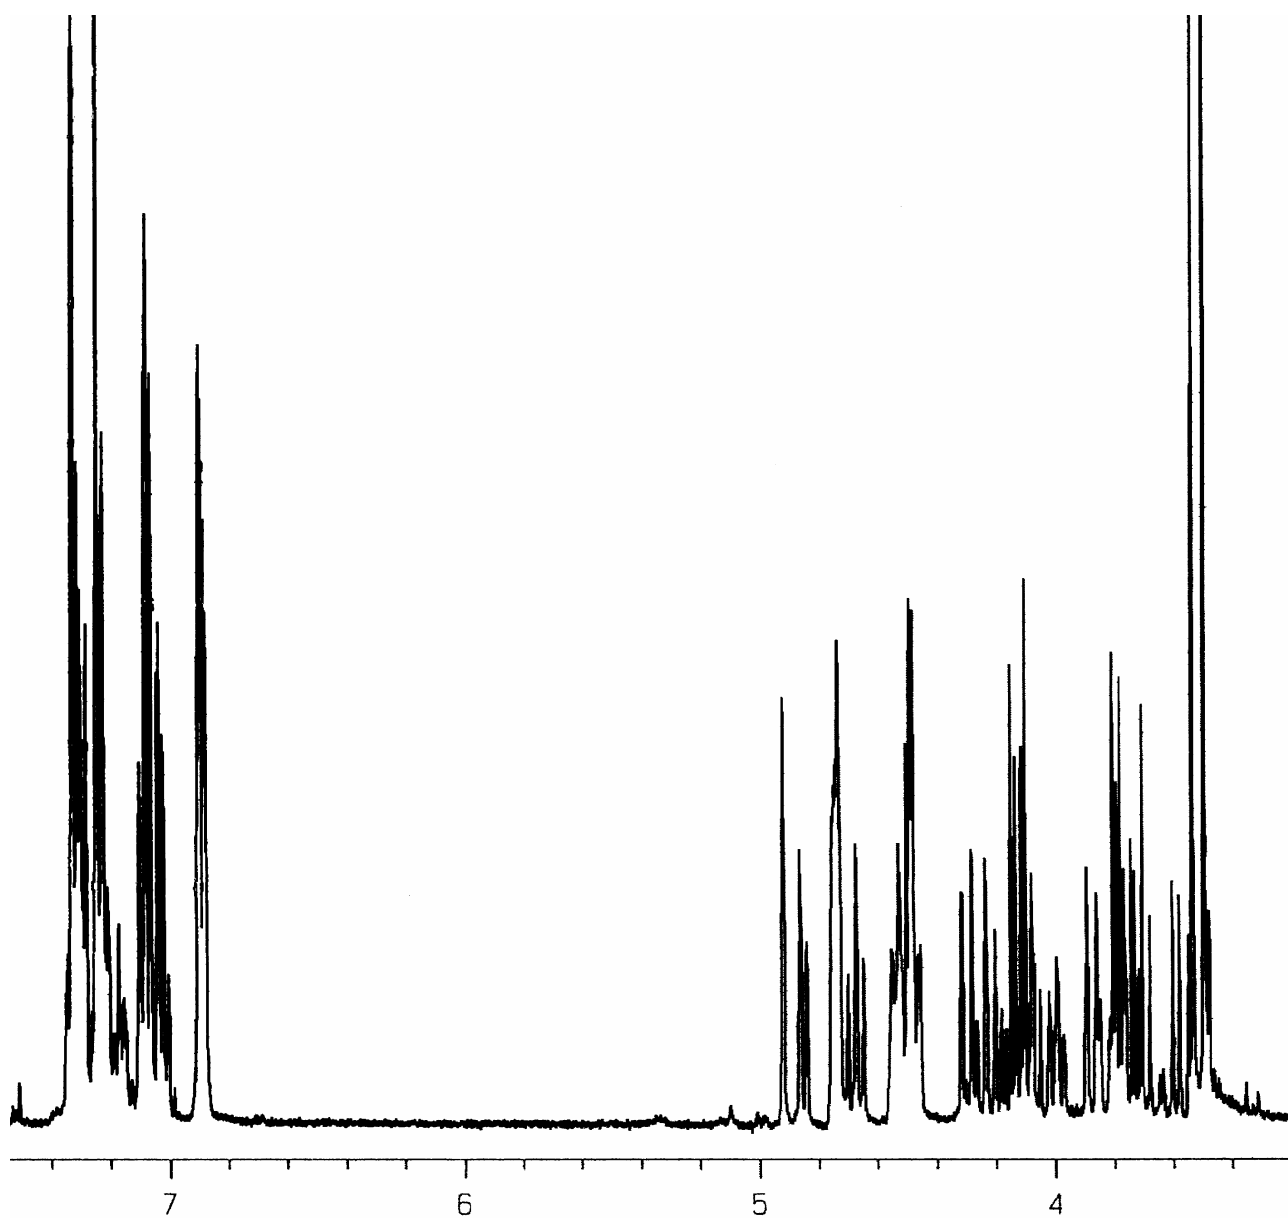

Figure S31.  $^1\text{H}$  NMR for the mixture of **7A**, **7C**, and **7D** (**Fr4**).

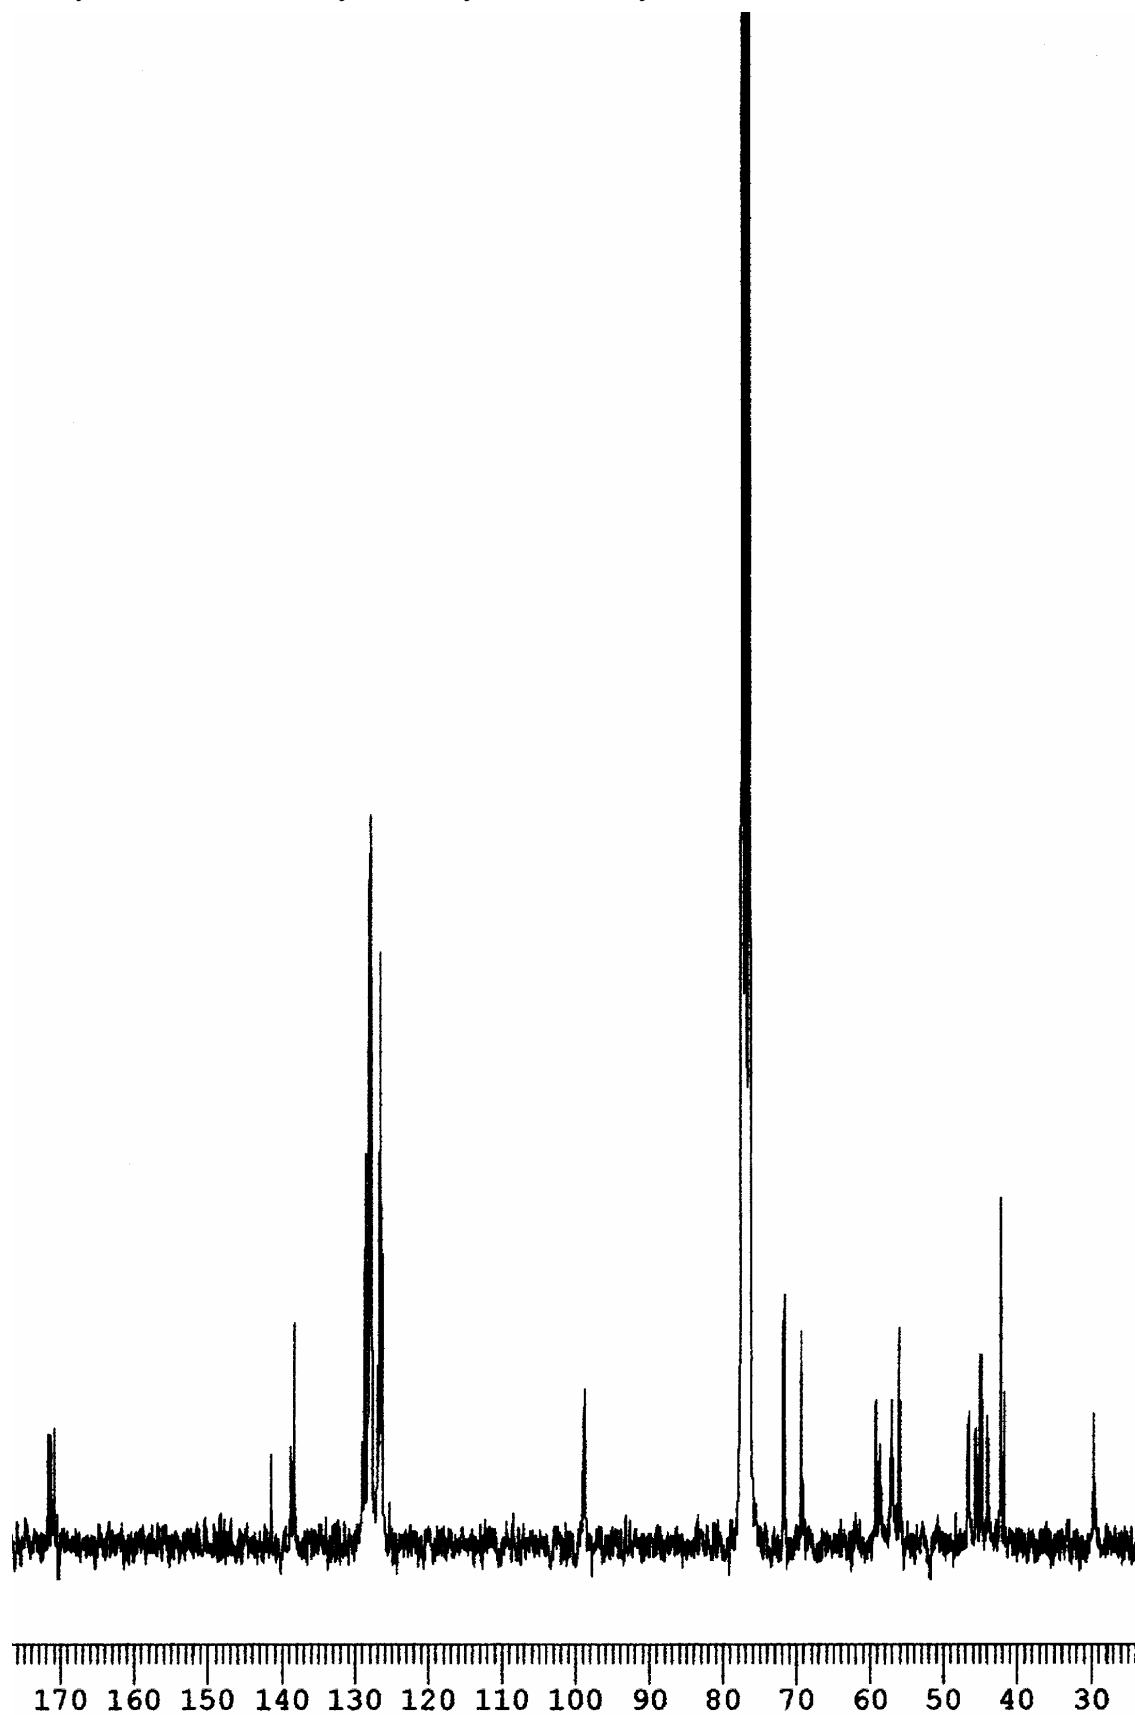

Figure S32.  $^{13}\text{C}$  NMR for the mixture of **7A**, **7C**, and **7D** (**Fr4**).

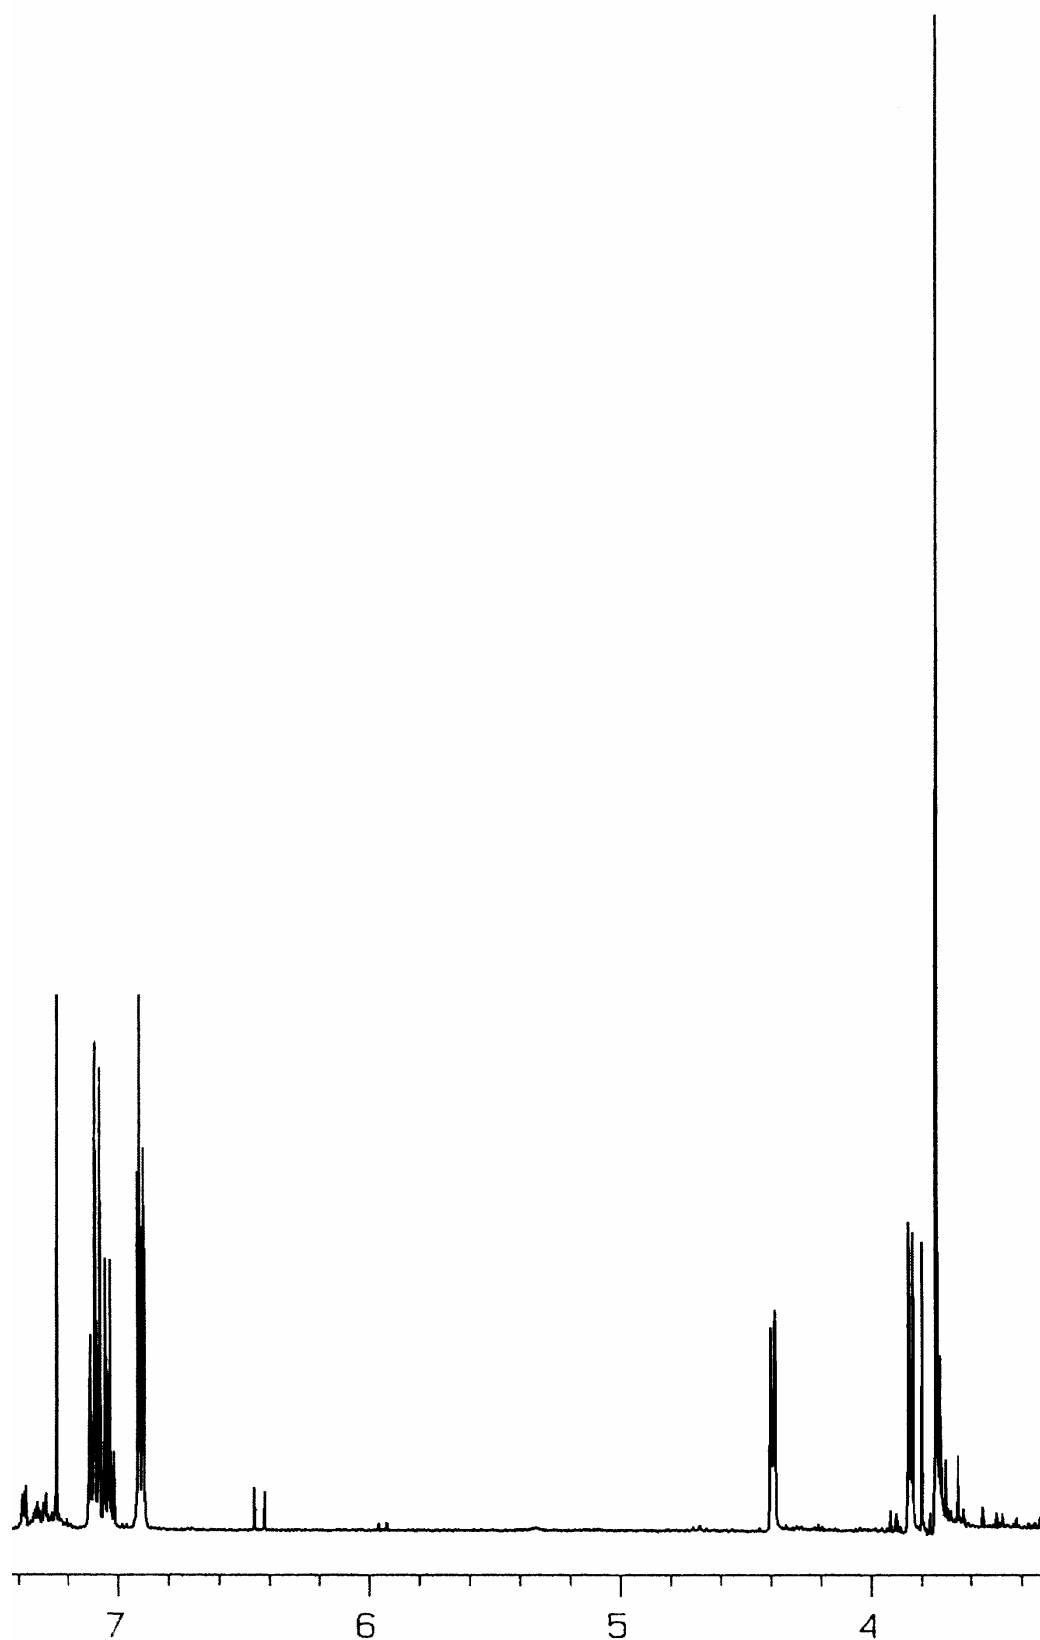

Figure S33. <sup>1</sup>H NMR of β-truxinate (**8β**).

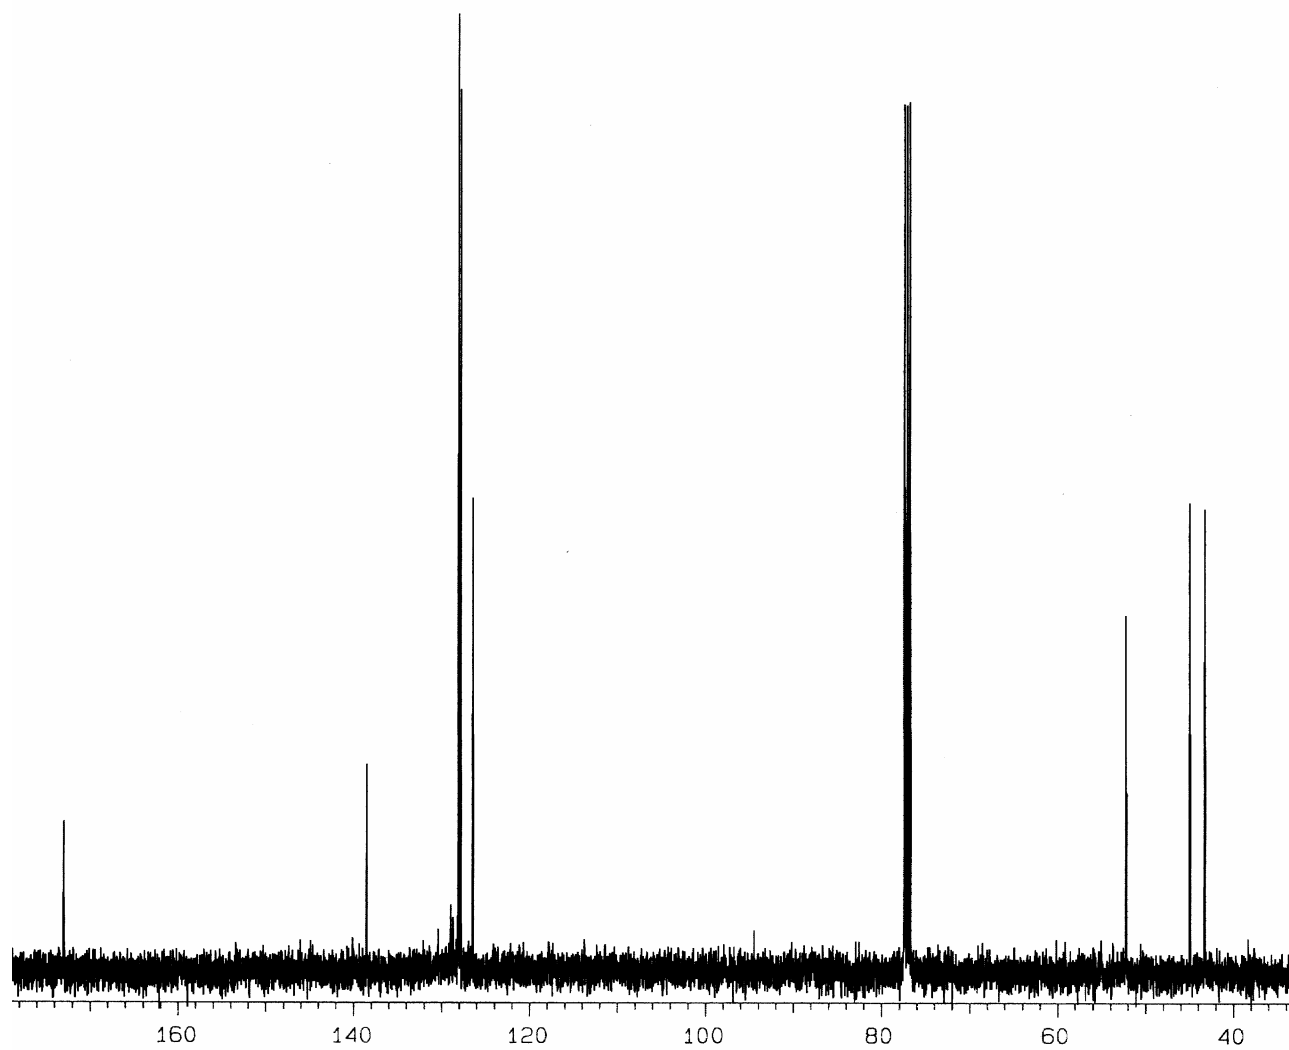

Figure S34.  $^{13}\text{C}$  NMR of  $\beta$ -truxinate (**8 $\beta$** ).

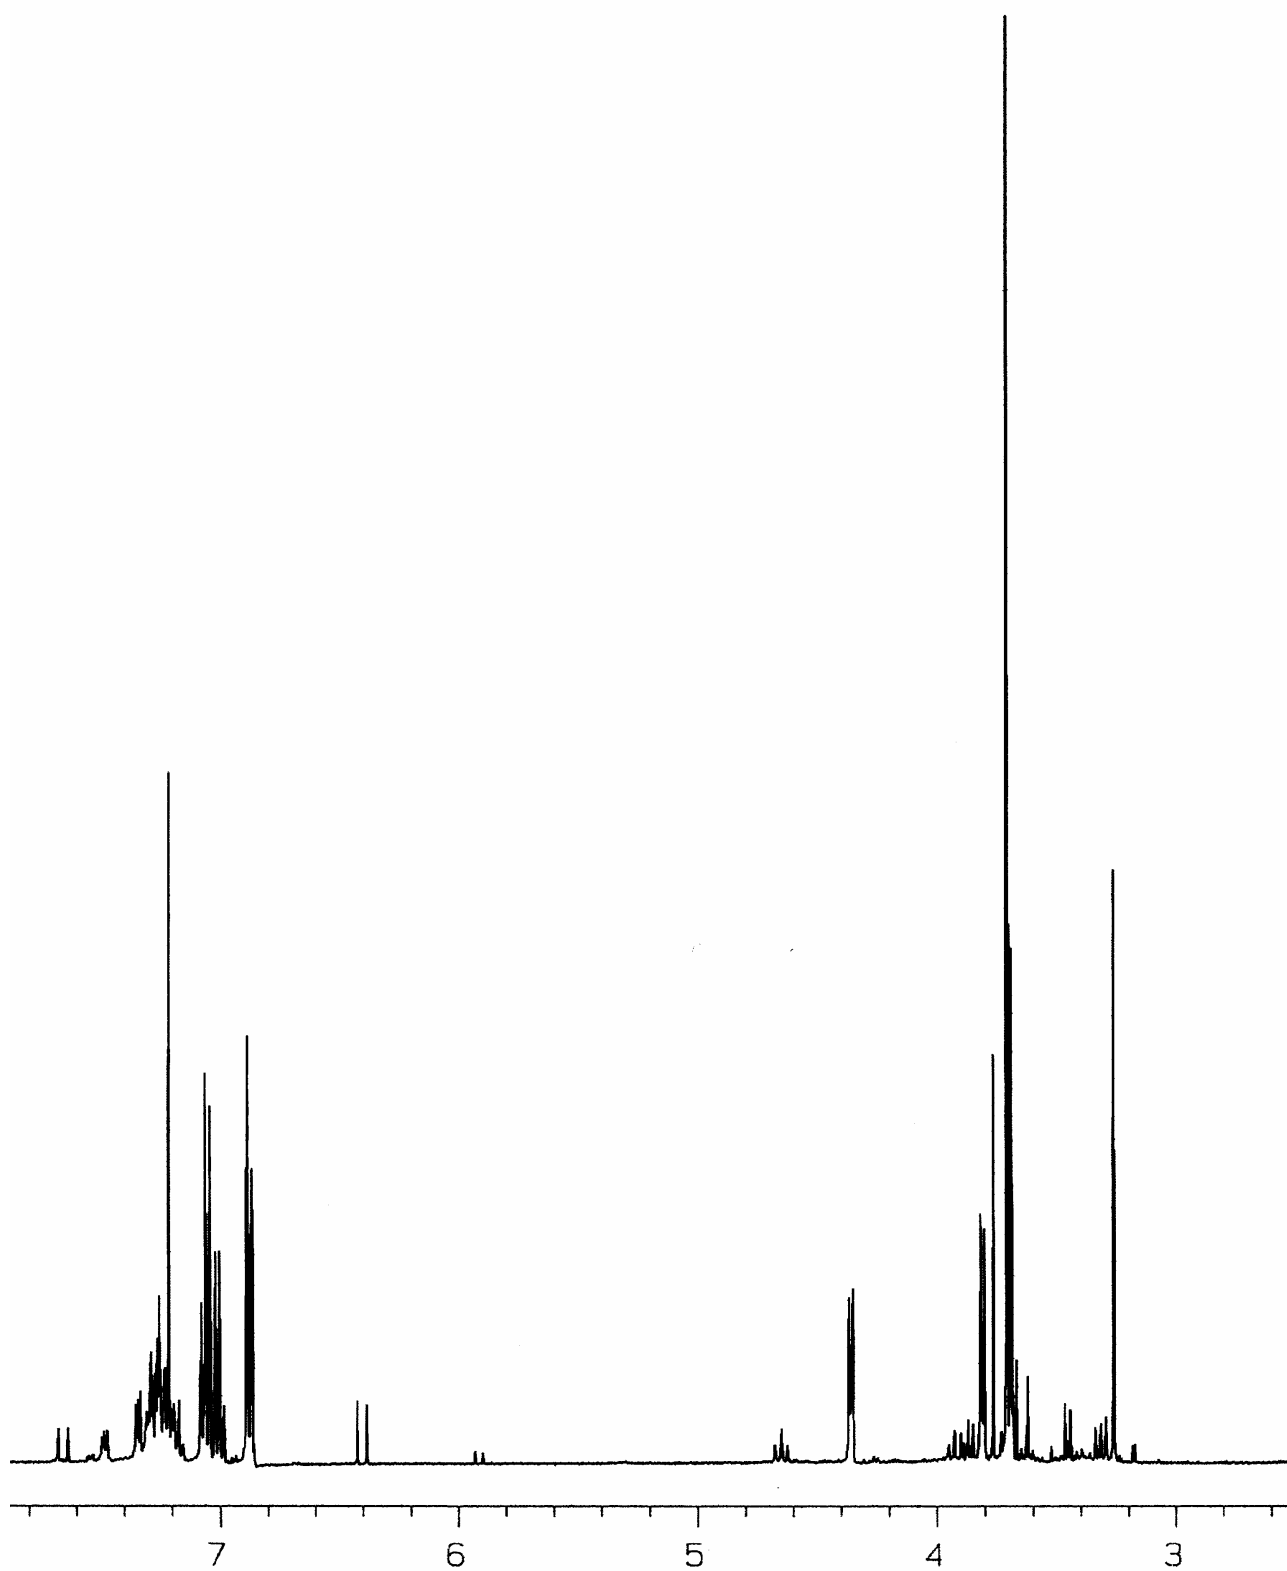

Figure S35.  $^1\text{H}$  NMR for the mixture of **8 $\beta$** , **8 $\delta$** , and **8 $\xi$**  (**Fr4**).

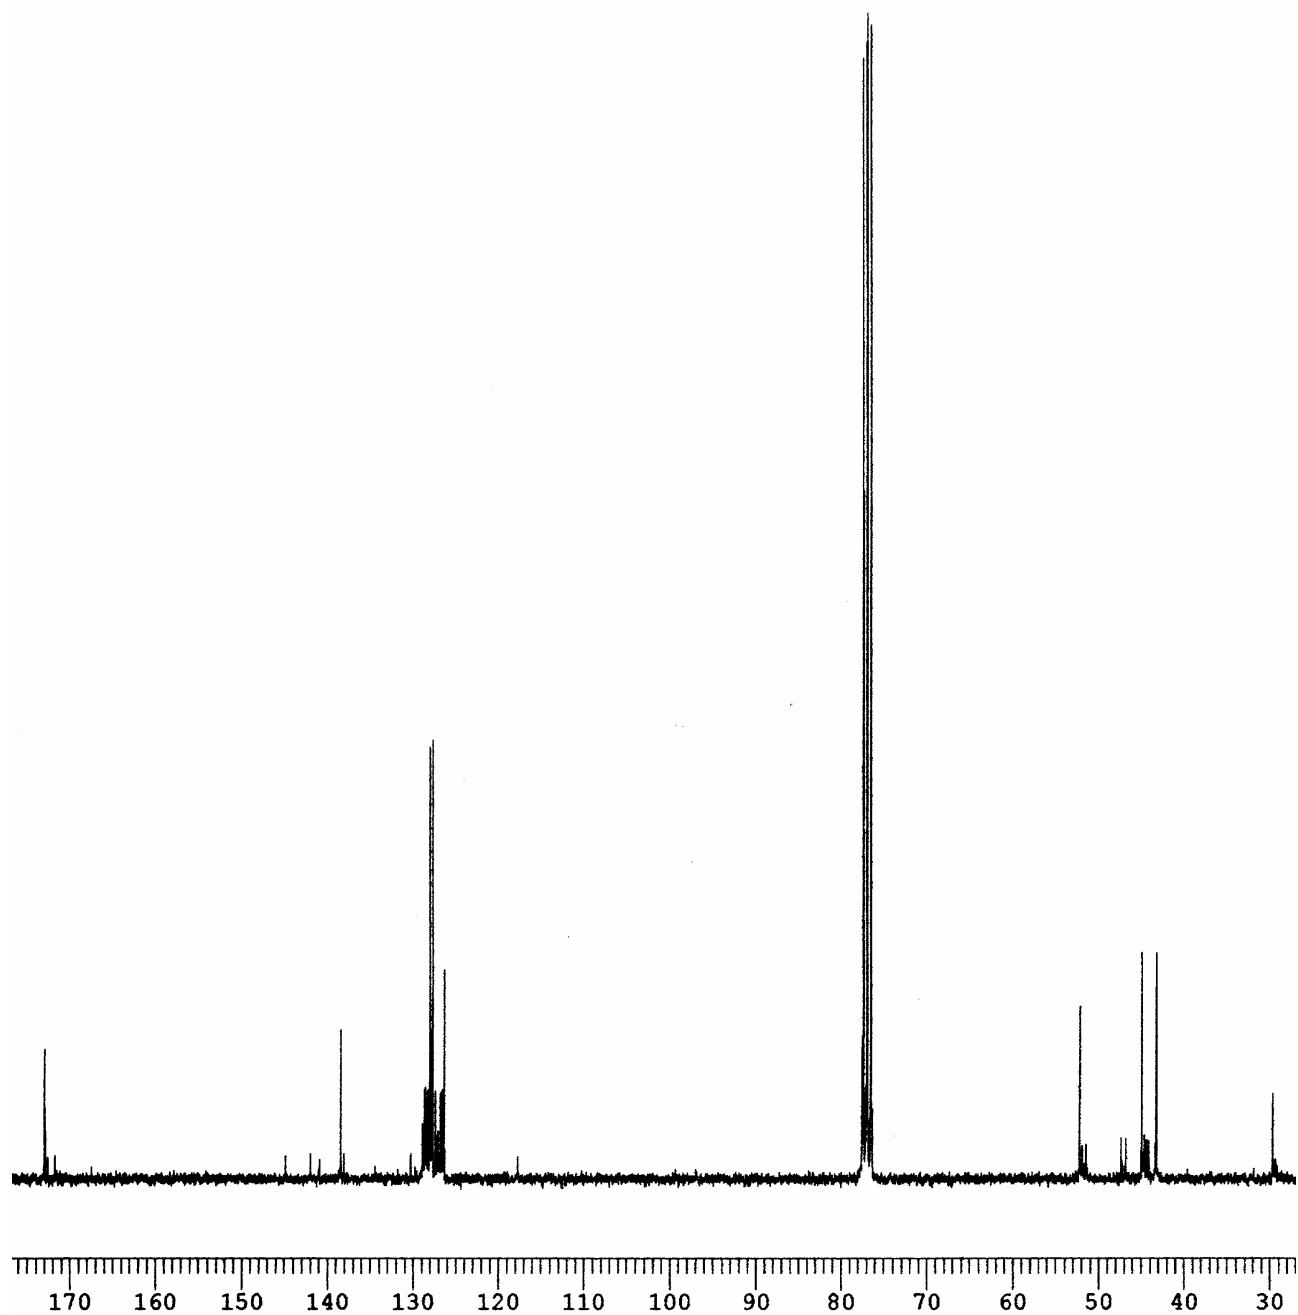

Figure S36.  $^{13}\text{C}$  NMR for the mixture of **8 $\beta$** , **8 $\delta$** , and **8 $\xi$**  (**Fr4**).

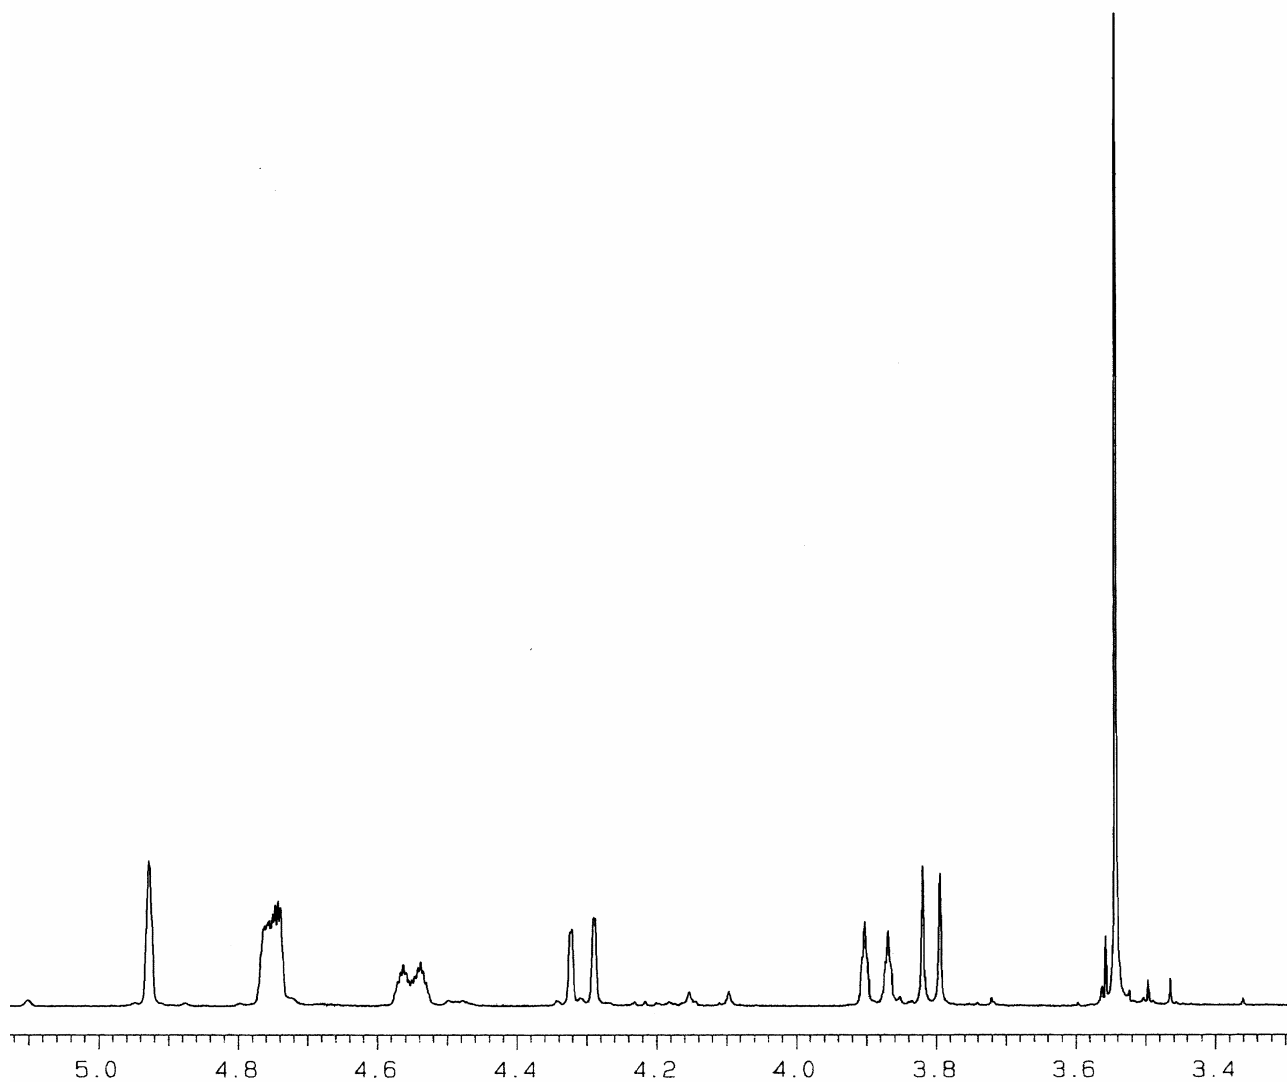

Figure S37.  $^1\text{H}$  NMR of methyl  $\beta$ -D-xylopyranoside-2,4- $\beta$ -truxinate- $d_{14}$  (**7d<sub>14</sub>A**).

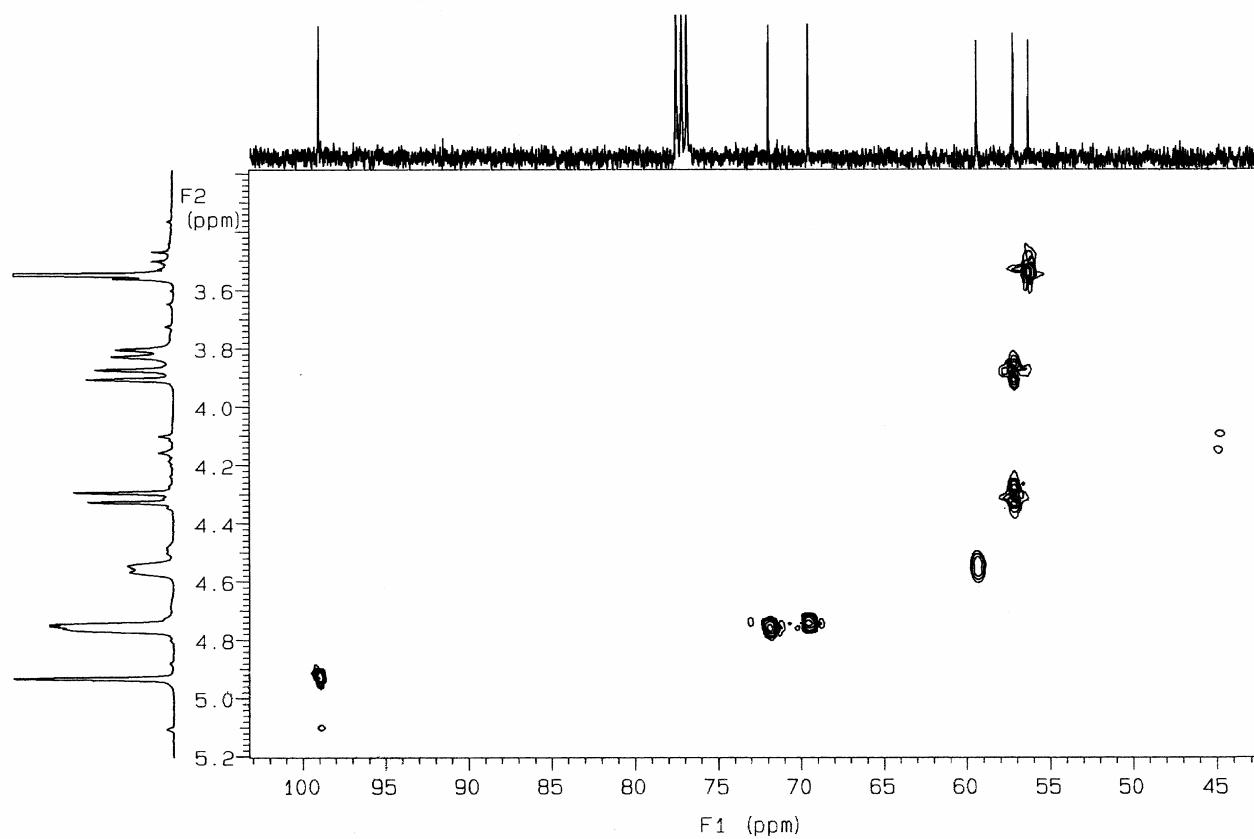

Figure S38. HMQC of methyl  $\beta$ -D-xylopyranoside-2,4- $\beta$ -truxinate- $d_{14}$  (**7d<sub>14</sub>A**).



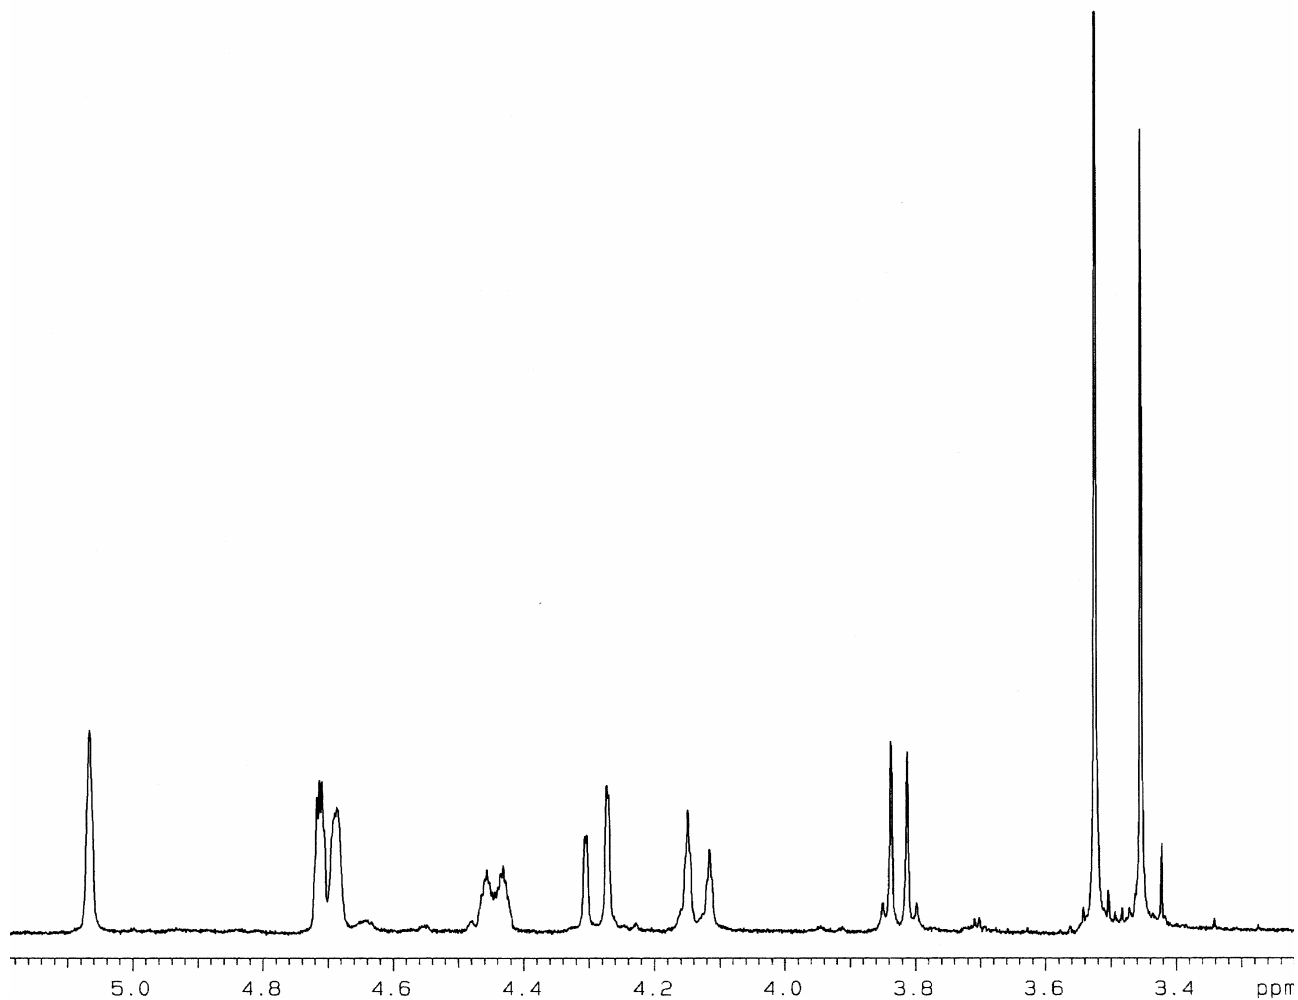

Figure S39.  $^1\text{H}$  NMR of methyl  $\beta$ -D-xylopyranoside-2,4- $\beta$ -truxinate- $d_{14}$  (**7d<sub>14</sub>B**).

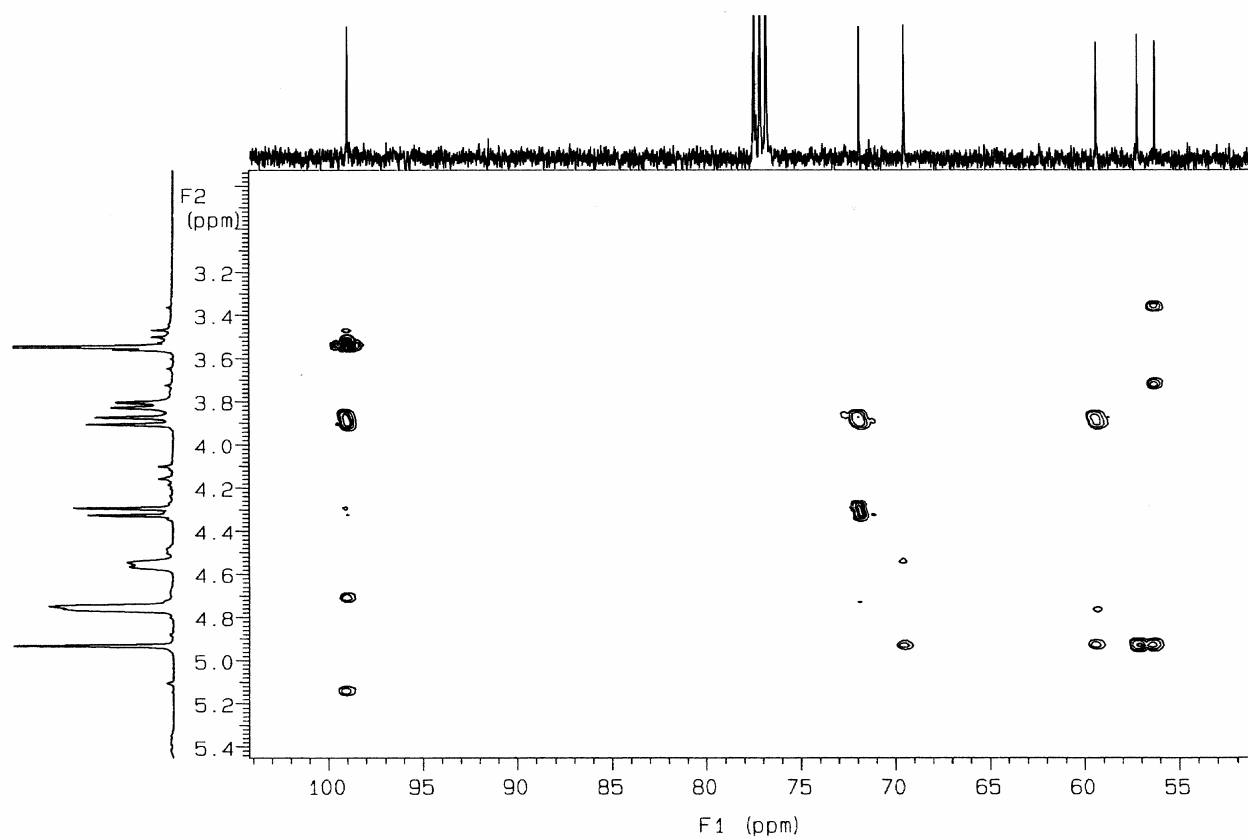

Figure S40. HMBC of methyl  $\beta$ -D-xylopyranoside-2,4- $\beta$ -truxinate- $d_{14}$  (**7d<sub>14</sub>A**).

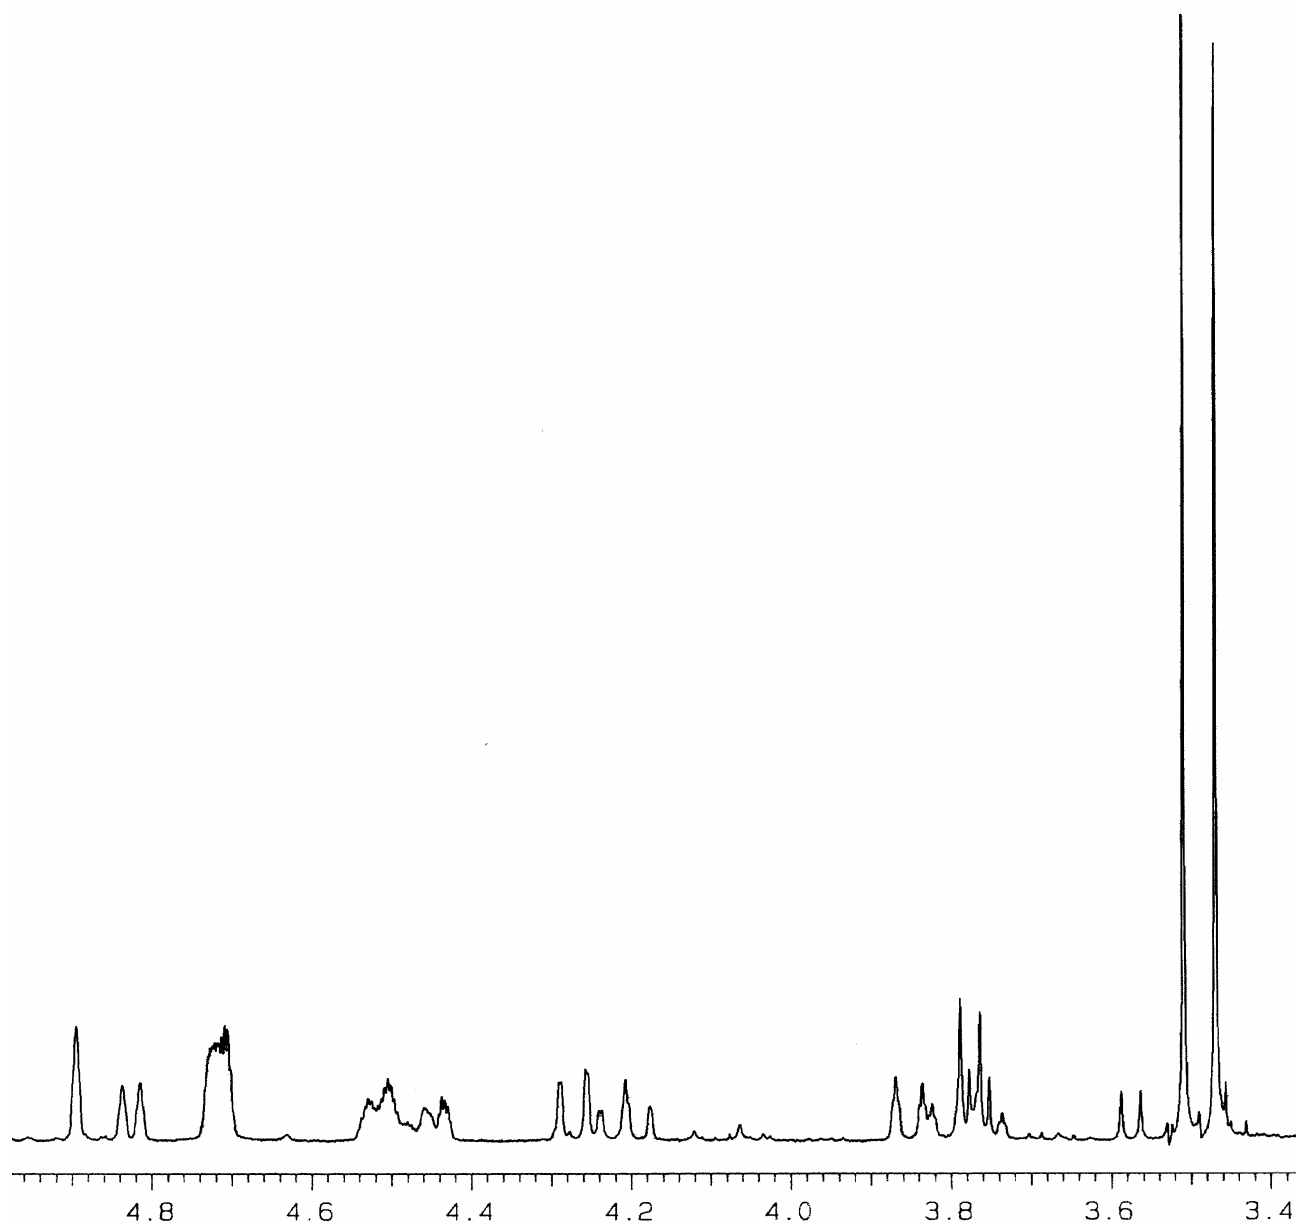

Figure S41. <sup>1</sup>H NMR for the mixture of **7d<sub>14</sub>A**, **7d<sub>14</sub>C**, and **7d<sub>14</sub>D (Fr3)**.

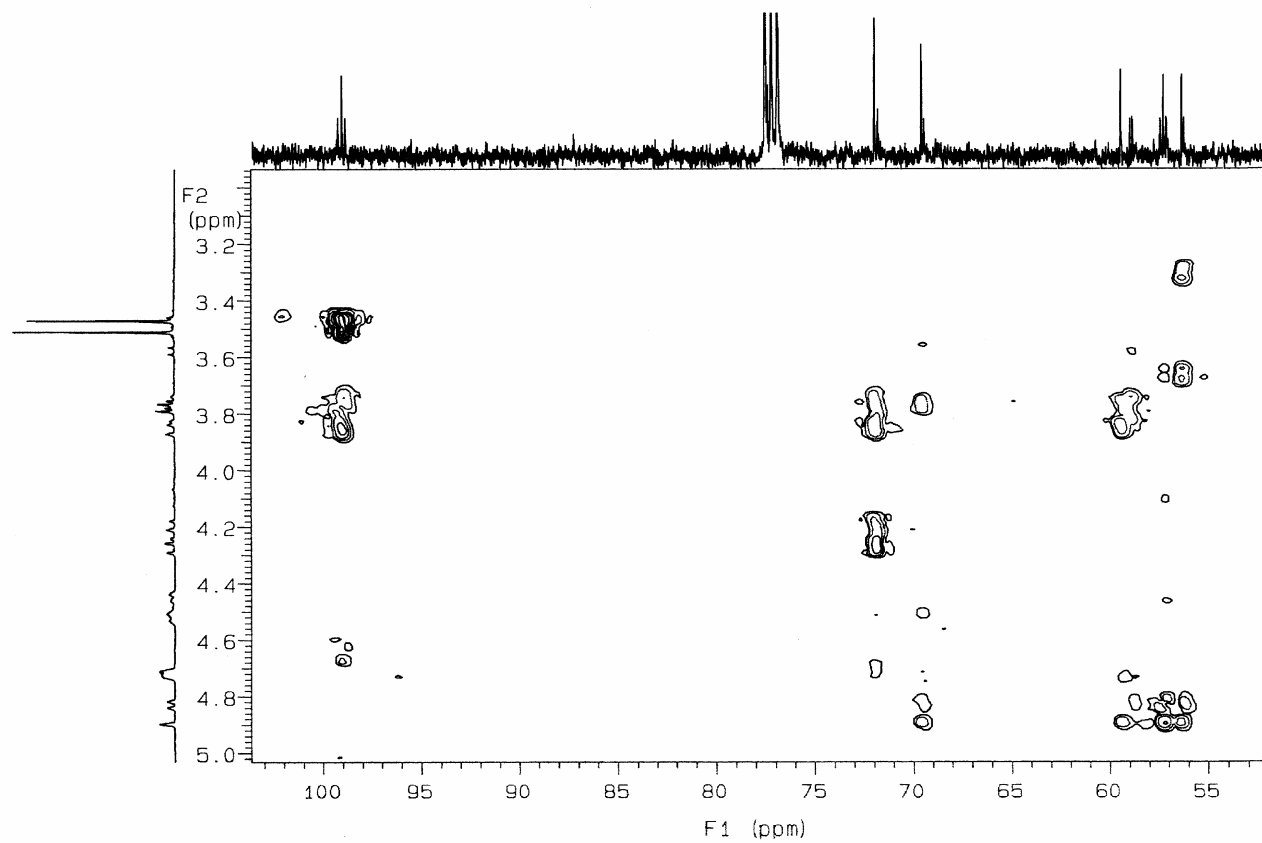

Figure S42. HMBC for the mixture of **7d<sub>14</sub>A**, **7d<sub>14</sub>C**, and **7d<sub>14</sub>D (Fr3)**.

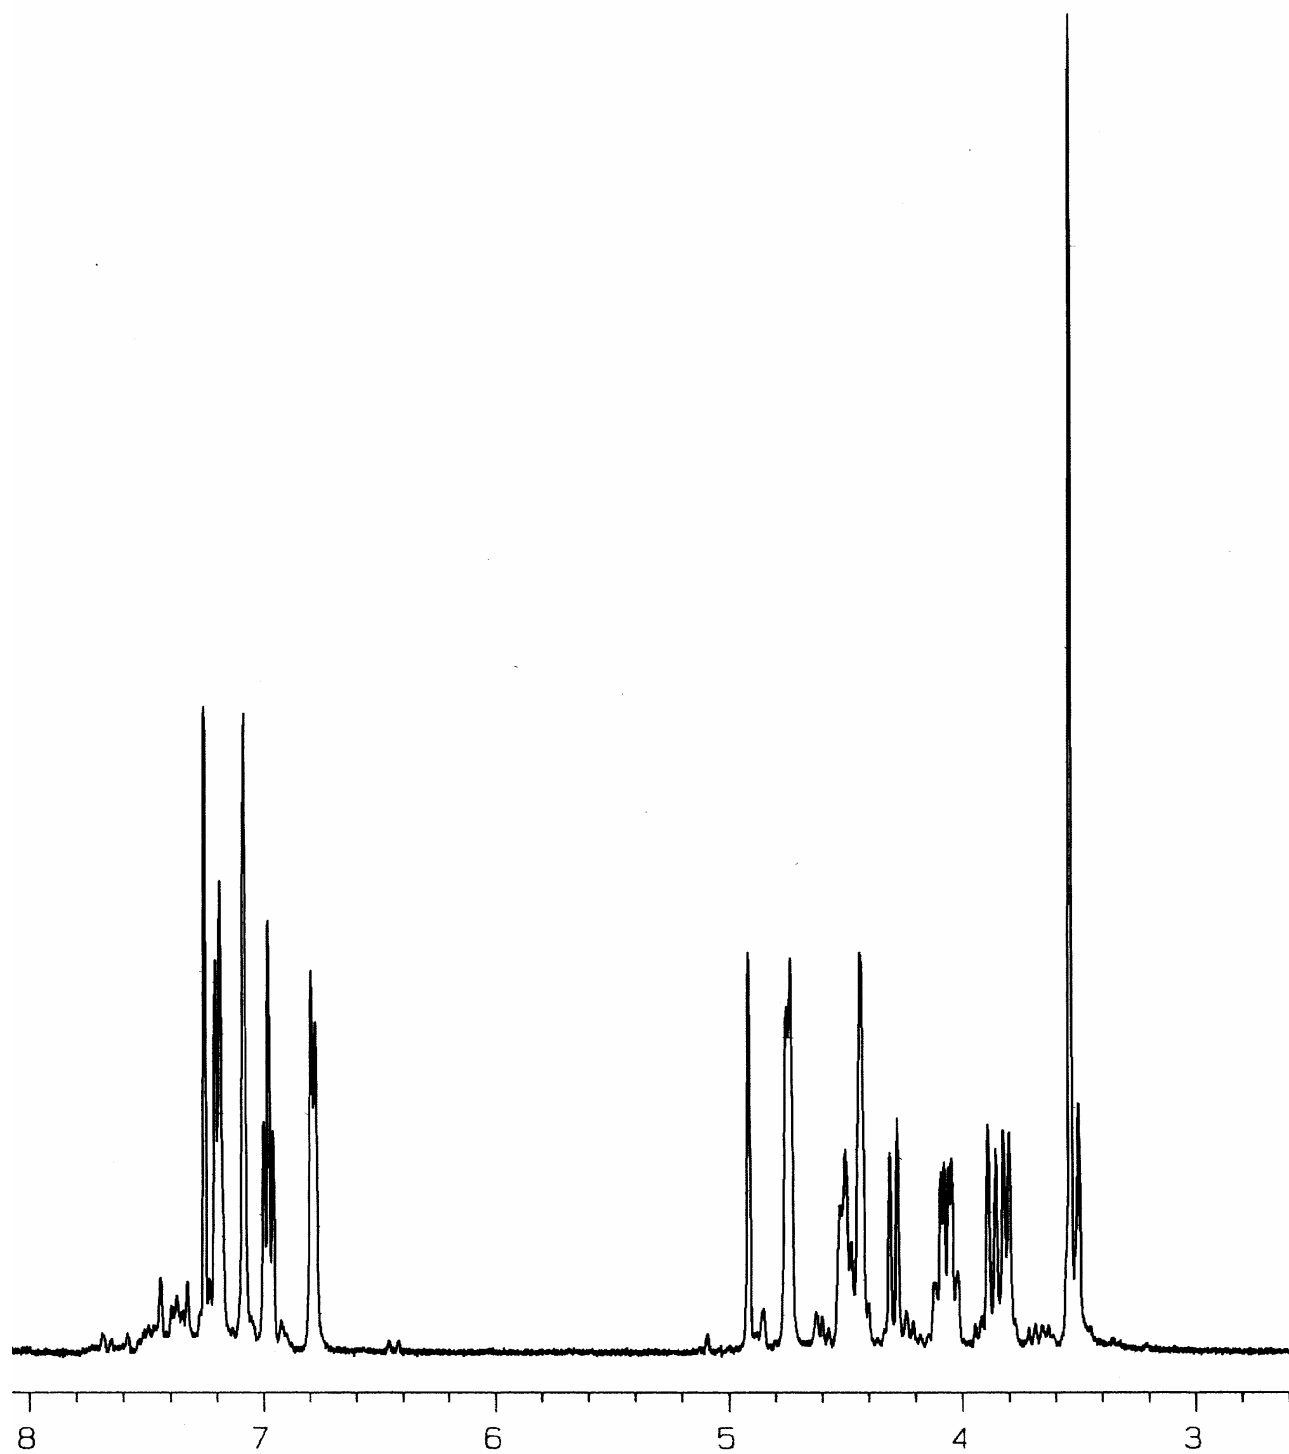

Figure S43. <sup>1</sup>H NMR of methyl  $\beta$ -D-xylopyranoside-2,4- $\beta$ -3,3'-dibromotruxinate (**7BrA**).

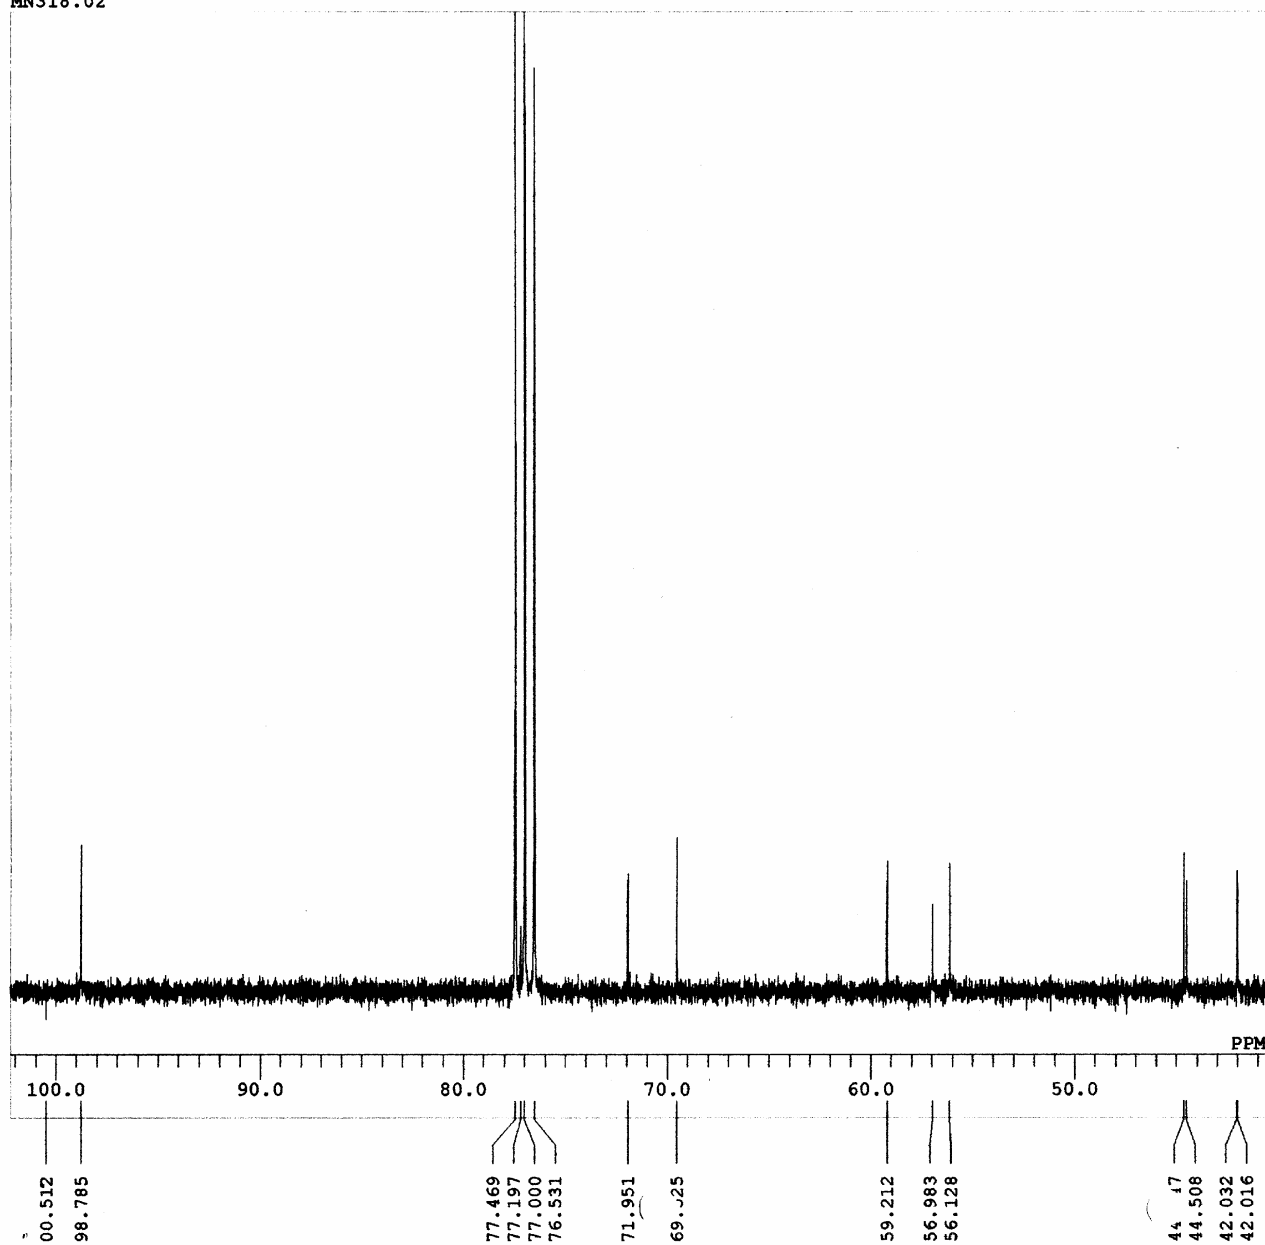Figure S44. <sup>13</sup>C NMR of methyl β-D-xylopyranoside-2,4-β-3,3'-dibromotruvinate (**7BrA**).

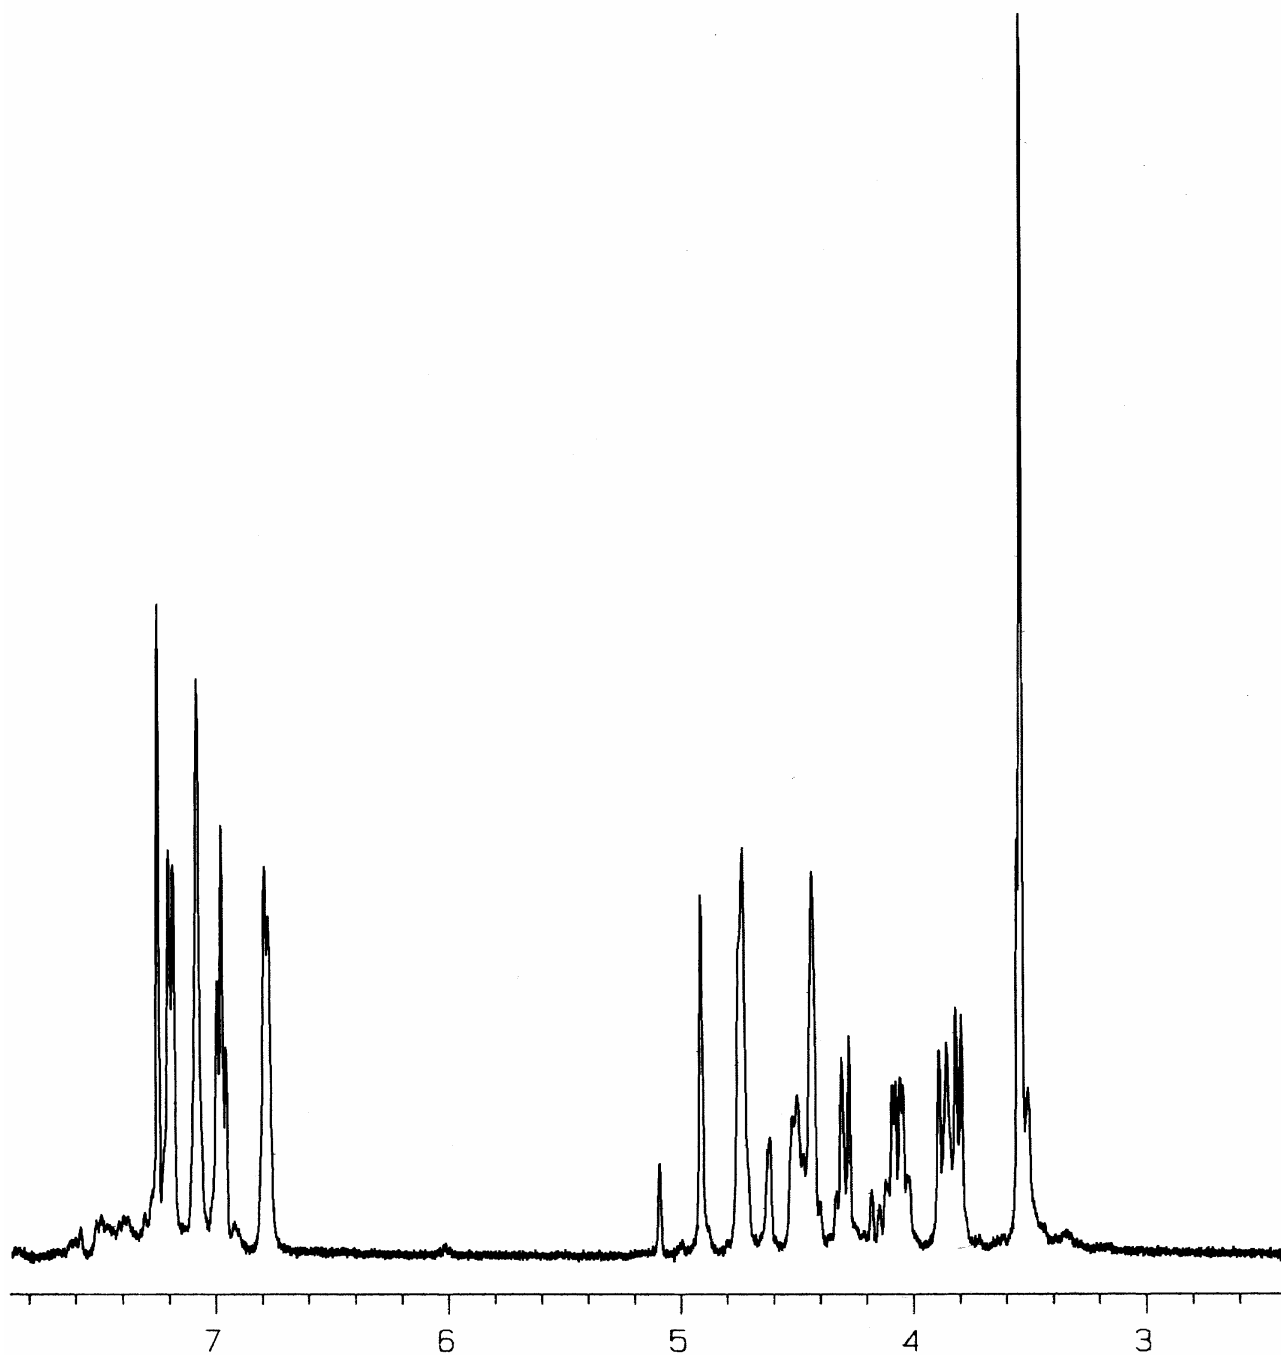

Figure S45.  $^1\text{H}$  NMR for the mixture of **7BrA** and **7BrB** (**Fr1**).

C:\WINNMR98\COMMON\\_DEFAULT.ALS  
Br.Irr

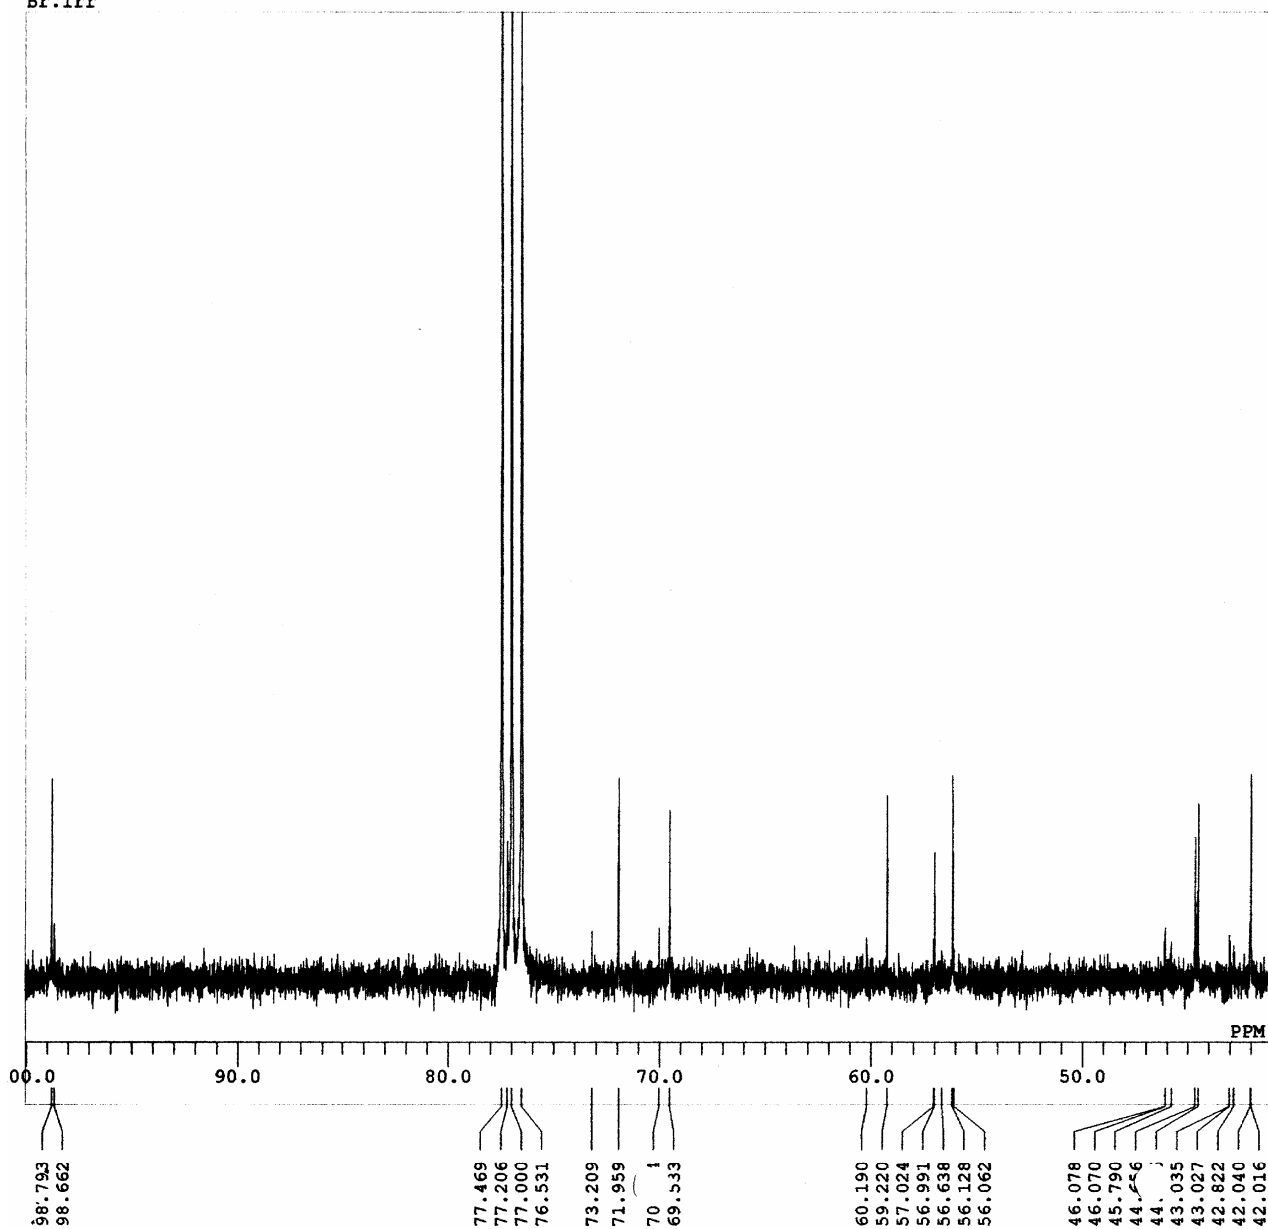

Figure S46.  $^{13}\text{C}$  NMR for the mixture of **7BrA** and **7BrB (Fr1)**.



C:\WINNMR98\COMMON\nakatani\整理\Cin\Br. ester\Br. ester. 1. als  
ester1

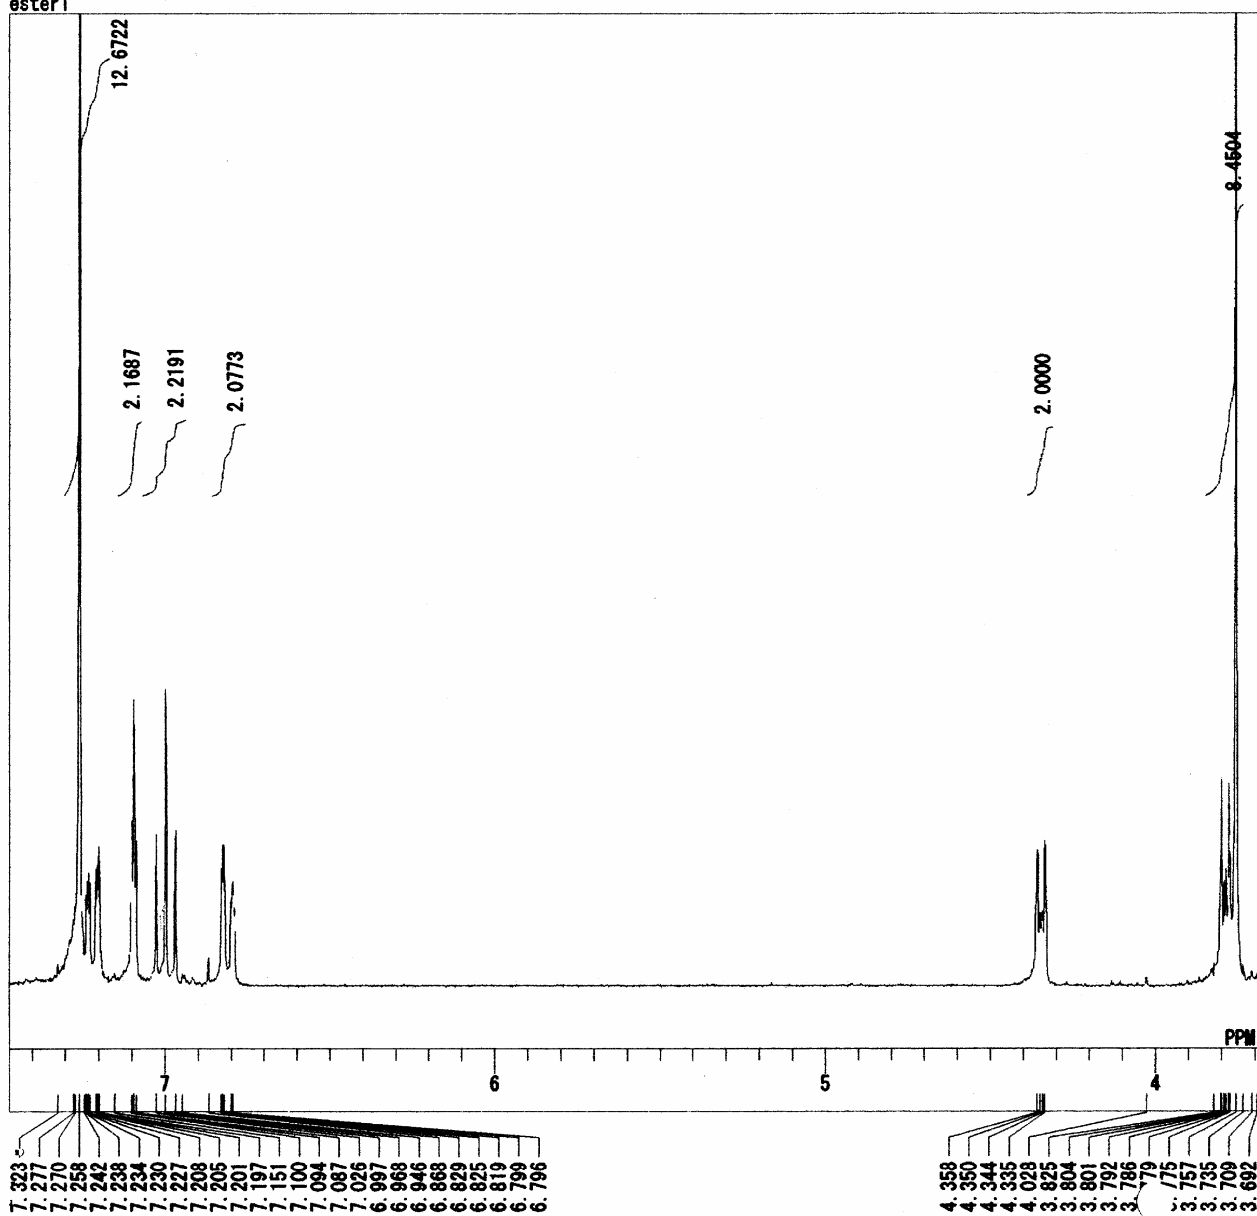

Figure S47.  $^1\text{H}$  NMR of  $\beta$ -3,3'-dibromotruvinate (**8Br $\beta$** ).

C:\WINNMR98\COMMON\DEFAULT.ALS  
PHY1.001

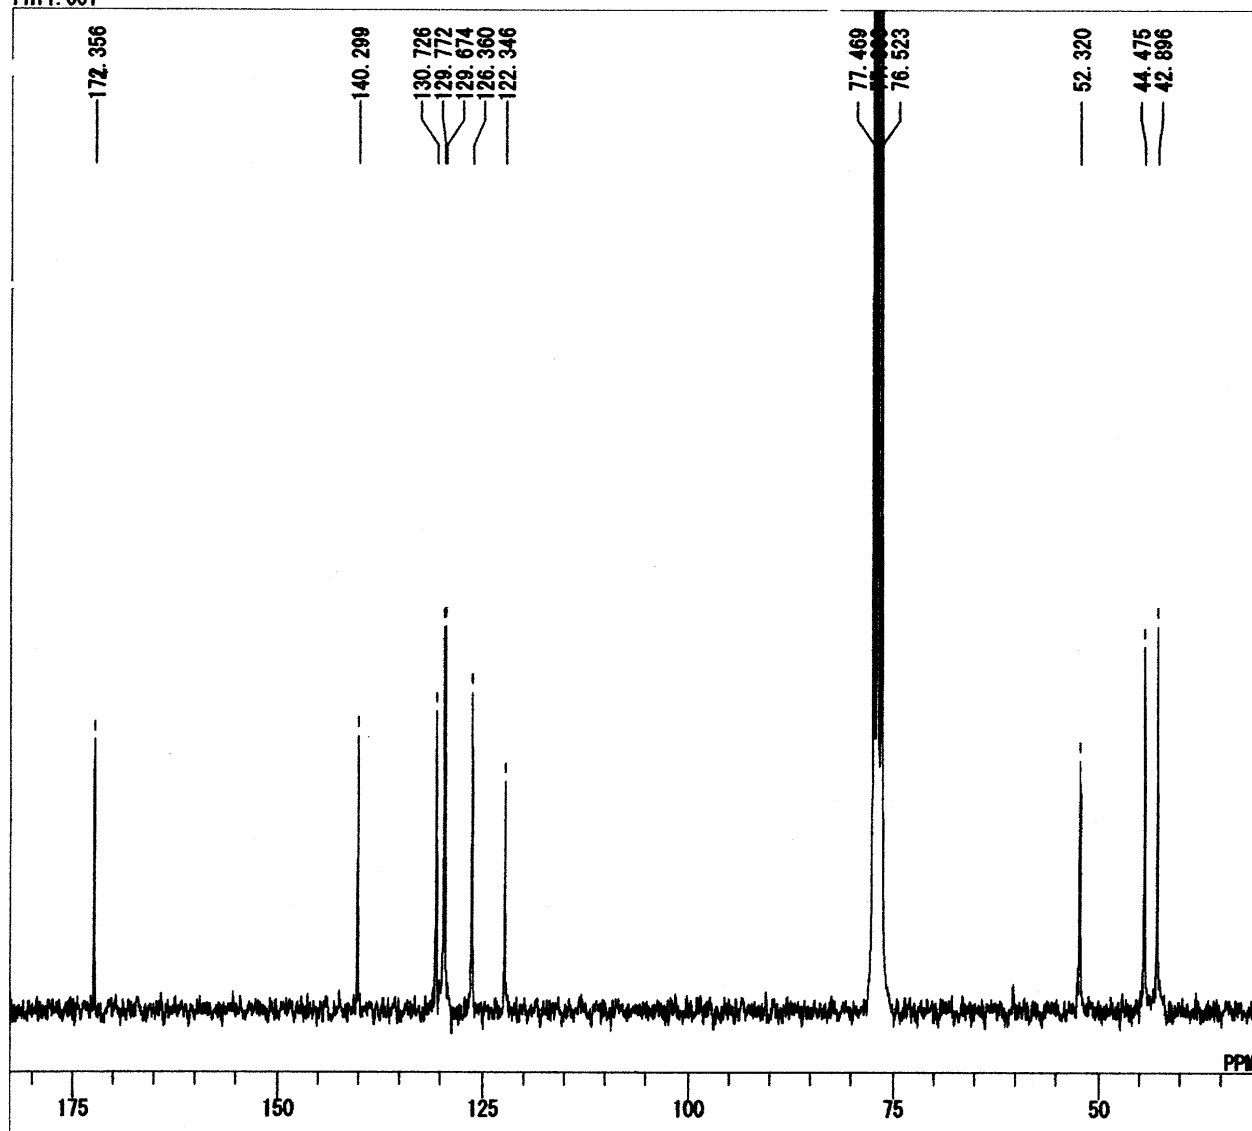

Figure S48.  $^{13}\text{C}$  NMR of  $\beta$ -3,3'-dibromotruvinate (**8Br $\beta$** ).
